# Supplementary material for: KLK3/PSA and cathepsin D activate VEGF-C and VEGF-D
Source: eLife journal article supplement (doi:10.7554/elife.44478), 2019-05-17
Supplement: supp [file elife-44478-supp-v1.zip]

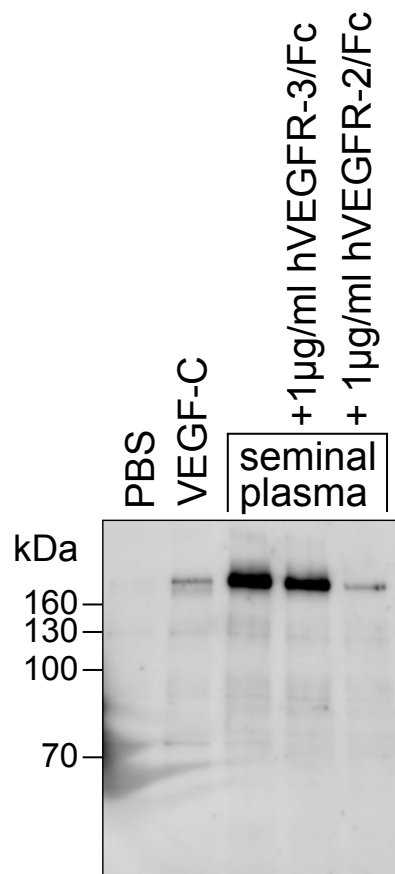

IP: Streptactin (VEGFR-2), WB: PY

Figure 3-figure supplement 2: The VEGFR-2 phosphorylating activity of seminal plasma is blocked by the VEGF-A-capturing VEGFR-2/Fc fusion protein
