# Supplementary material for: KLK3/PSA and cathepsin D activate VEGF-C and VEGF-D
Source: eLife journal article supplement (doi:10.7554/elife.44478), 2019-05-17
Supplement: supp [file elife-44478-supp-v1.zip]

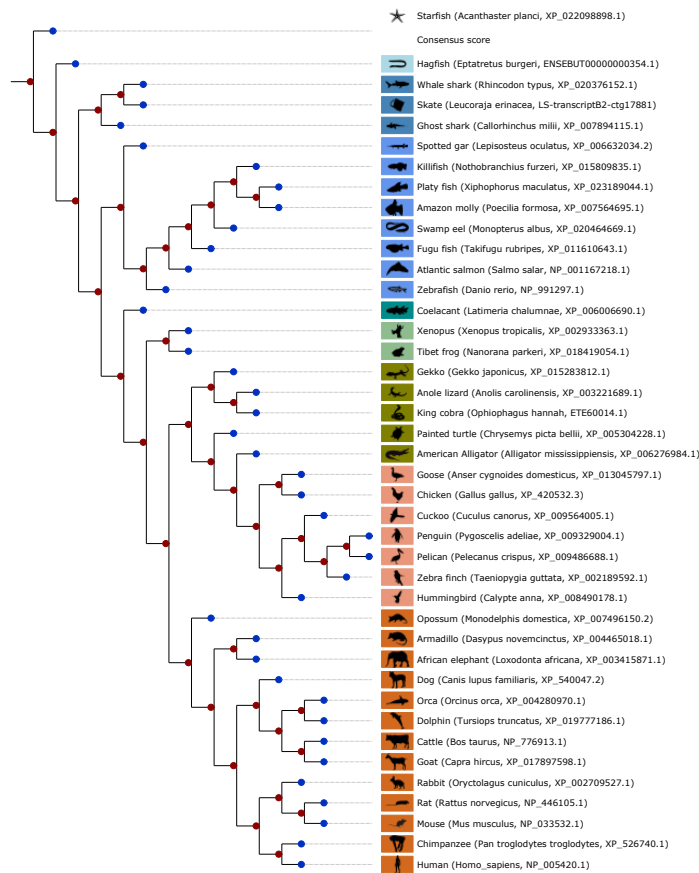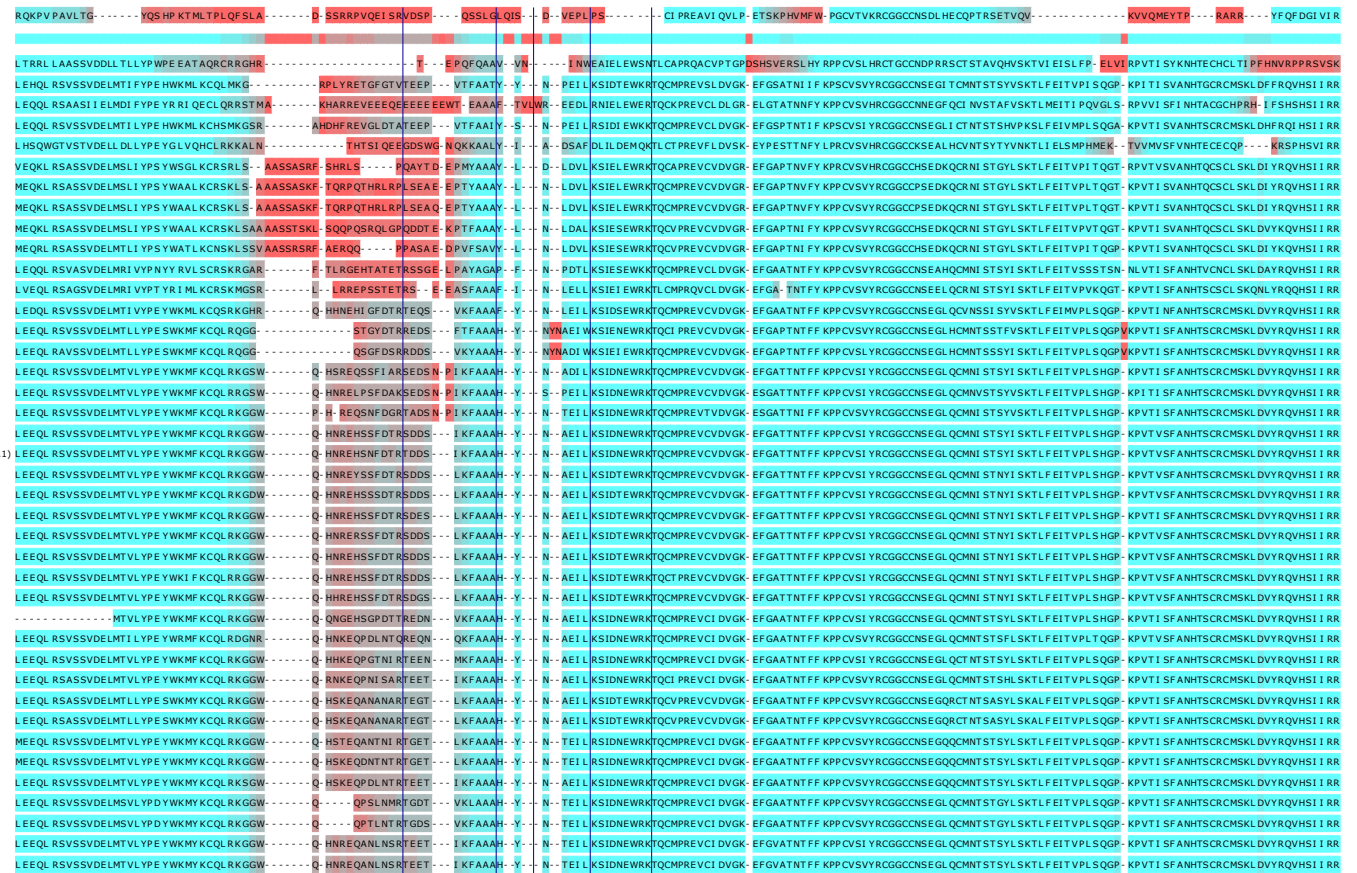

Figure 2-figure supplement 3: Interspecies analysis of VEGF-C amino acid sequences relevant for activation
