# Supplementary material for: KLK3/PSA and cathepsin D activate VEGF-C and VEGF-D
Source: eLife journal article supplement (doi:10.7554/elife.44478), 2019-05-17
Supplement: supp [file elife-44478-supp-v1.zip]

Archive with 22 entries (22 files):
- elife_poa_e44478_Figure_7_figure_supplement_2.pdf
- elife_poa_e44478_Figure_4_source_data_1.zip
- elife_poa_e44478_Supplementary_file_2.xlsx
- elife_poa_e44478_Figure_8_source_data_1.zip
- elife_poa_e44478_Figure_6_figure_supplement_1.pdf
- elife_poa_e44478_Figure_2_figure_supplement_3.pdf
- elife_poa_e44478_Supplementary_file_1.docx
- elife_poa_e44478_Transparent_Reporting_File.pdf
- elife_poa_e44478_Figure_4_figure_supplement_1.pdf
- elife_poa_e44478_Figure_3_figure_supplement_3.pdf
- elife_poa_e44478_Figure_5_source_data_1.zip
- elife_poa_e44478_Figure_3_figure_supplement_1.pdf
- elife_poa_e44478_Figure_6_source_data_1.zip
- elife_poa_e44478_Figure_1_source_data_1.zip
- elife_poa_e44478_Figure_7_figure_supplement_1.pdf
- elife_poa_e44478_Figure_2_figure_supplement_1.pdf
- elife_poa_e44478_Figure_5_figure_supplement_1.pdf
- elife_poa_e44478_Figure_3_figure_supplement_2.pdf
- elife_poa_e44478_Figure_3_source_data_1.zip
- elife_poa_e44478_Figure_2_figure_supplement_2.pdf
- elife_poa_e44478_Figure_7_source_data_1.zip
- elife_poa_e44478_Figure_8_figure_supplement_1.pdf
