# Supplementary material for: KLK3/PSA and cathepsin D activate VEGF-C and VEGF-D
Source: eLife journal article supplement (doi:10.7554/elife.44478), 2019-05-17
Supplement: supp [file elife-44478-supp-v1.zip]

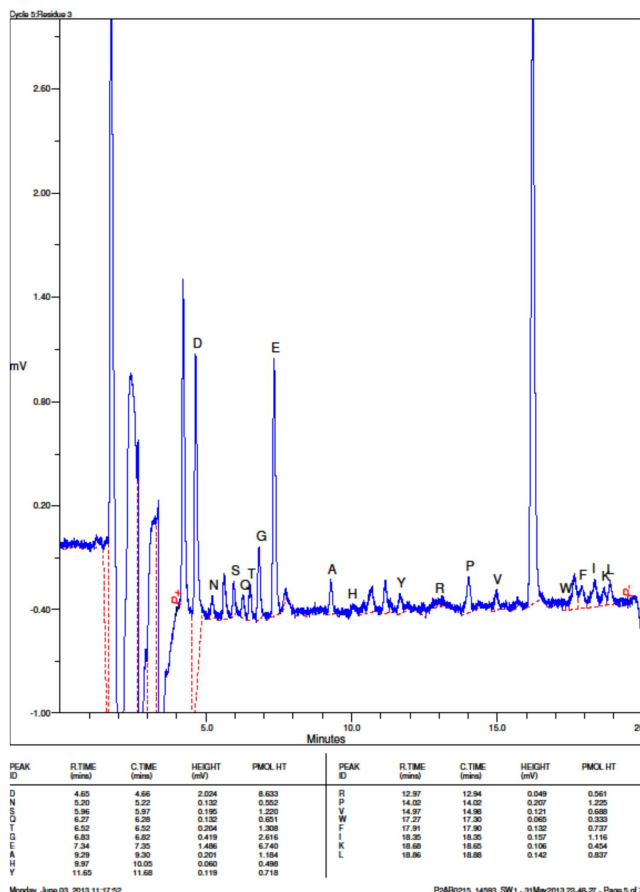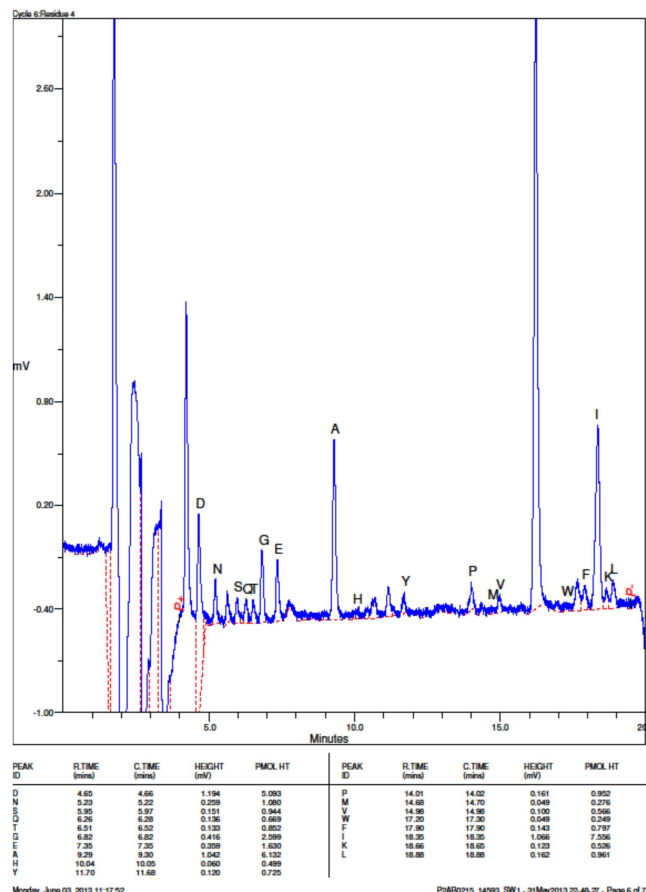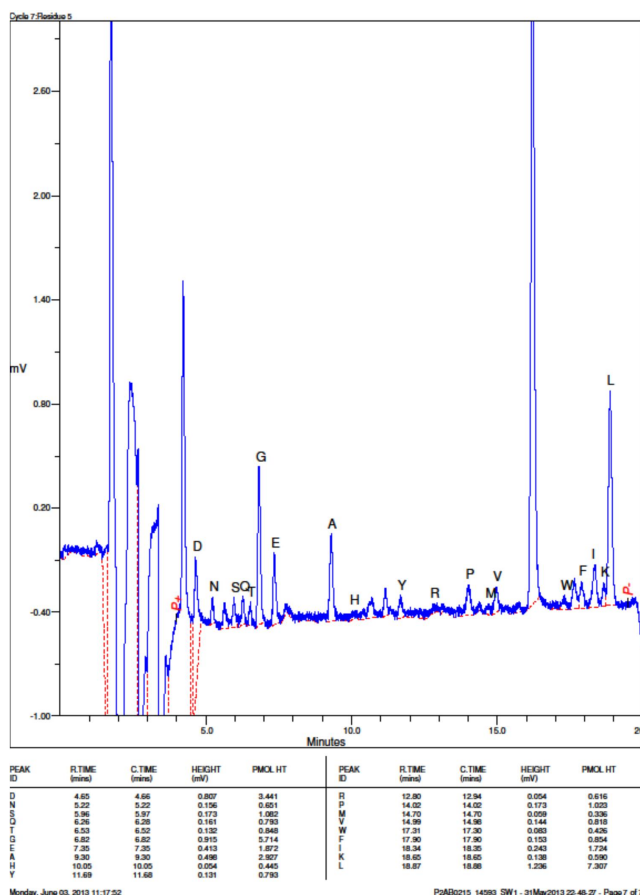

File: /home/mjeltch/Documents/Sci...EGF/ProtSeq/CLK3/disambig.txt Page 1 of 1

protein\_sequences.fasta:

```
>[p] P07288|KLK3_HUMAN Prostate-specific antigen OS=Homo sapiens OX=9606 GN=KLK3
PE=1 SV=2
MWRPVVLTLSVTW GAAPLI LSRI VGMCECKHSQVQWLVASRGRAVCGGLVHPQW/
LTAACI RNSVI LLGRSLFHPEDTGVQVSHSFPHLYDMSLLKNRFLRPGDSSHD
LMLRLSEPAELTDAVKMDLPTQEPALGTTCYASQMSI EPEELTPKKLQVQDLHI S
NDVCAQVHPQVTKFMLCAGRWFGGSTCSGDSGGLVCGVLLQG TSWSEPCALPERP
SLYTKVHYRW KDTI VAP
>VEGF_HUMAN P49767 Vascular endothelial growth factor C precursor (VEGF-C)
(Vascular endothelial growth factor related protein) (VRP) (Flt4 ligand) (Flt4-L).
MHLGFFSVACSLAAALLPGPREAPAAAFAESGLDSDAEPDAGEATAYASKOLEQL
RSVSVDELIMVLYPEIWHYKCOLRGQGNINRQANLNSTETI KFAAHYNTLE LK
SI DNEVRKTCQMPREVO DVGKEFGVATNTFFKPPQVSVYRGCGCGSEGLQNTSTSY
LSKTLFEI TVPLSQGPKVTI SFANHTSCROKMLDYRQVHI IRRSLPATLPQCAQAN
KTCPTNVMWNH CRCLAQEDFMSDAGDDSDTGDFHI CGPKNELDEETCCVCRAGLR
PASGPHKELDRNSCQVCKNLFPSQCGANREFDENTCCQCKRTCPRNPLNPGKAC
ECTESRQKLLKGKPHQITCSYVRPCTNRKXACEFGFSYSEVRCVPSYWRPQMS
```

protein\_sequences.fuzzpro:

```
#####
# Program fuzzpro
# Rndate: Mon 16 Jul 2018 11:43:46
# Command line: fuzzpro
# -pattern: "[NS][TS][EDG][AI][GLA]"
# [-sequence] protein_sequences.fasta
# Report format: seqtable
# Report file: protein_sequences.fuzzpro
#####
#
#
# Sequence: VEGF_HUMAN from 1 to: 419
# Hit Count: 2
#
# Pattern name: Msnatch Pattern
# pattern: 0 [NS][TS][EDG][AI][GLA]
#
#
# Start End Pattern Msnatch Sequence
# 115 119 pattern: [NS][TS][EDG][AI][GLA] NTEIL
# 265 269 pattern: [NS][TS][EDG][AI][GLA] SSDAG
#
#
# Total sequences: 2
# Total length: 680
# Reported sequences: 1
# Reported hit count: 2
#
```

Figure 2-figure supplement 2: Results of Edman degradation of KLK3-cleaved pro-VEGF-C
