# Supplementary material for: KLK3/PSA and cathepsin D activate VEGF-C and VEGF-D
Source: eLife journal article supplement (doi:10.7554/elife.44478), 2019-05-17
Supplement: supp [file elife-44478-supp-v1.zip › elife_poa_e44478_Figure_7_figure_supplement_1.pdf]

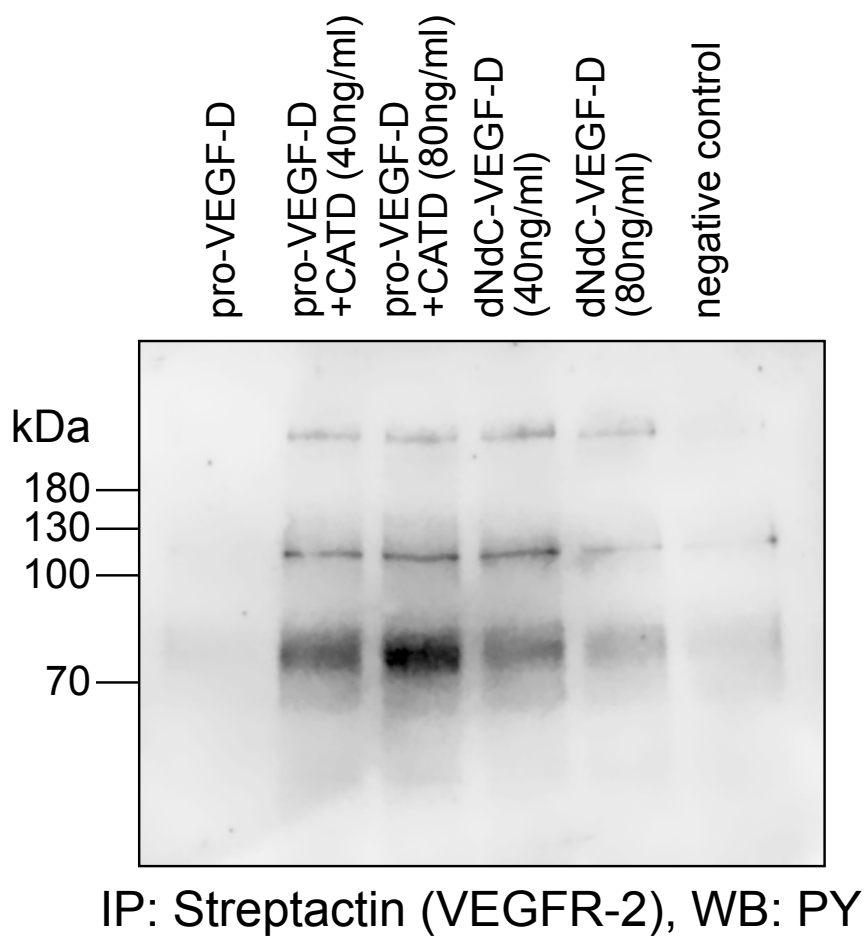

Figure 7-figure supplement 1. Cathepsin D-cleaved pro-VEGF-D stimulates the phosphorylation of VEGFR-2 in PAE cells
