# Supplementary material for: KLK3/PSA and cathepsin D activate VEGF-C and VEGF-D
Source: eLife journal article supplement (doi:10.7554/elife.44478), 2019-05-17
Supplement: supp [file elife-44478-supp-v1.zip › elife_poa_e44478_Supplementary_file_1.docx]

## Supplementary Table T1.

## List of anti-VEGF-C antibodies used in this study.

| **Antibody** | **Antigen** | **Purification** | **Supplier** | **Dilution** |
| --- | --- | --- | --- | --- |
| *Antisera (AS)* | | | | |
| AS no. 6 | histagged, human VEGF-C (aa 32-419) produced in HighFive cells | None | [(Baluk et al. 2005)](https://paperpile.com/c/mIUAVE/s0lG) | 1:2000 |
| AS 882 | peptide (aa 104-120): NH2-EETIKFAAAHYNTEILK = N-terminal sequence of minor, mature VEGF-C | None | [(Joukov et al. 1997)](https://paperpile.com/c/mIUAVE/g3IH) | 1:1000 |
| AS 905 | peptide (aa 33-54): NH2-ESGLDLSDAEPD AGEATAYASK = N-terminal sequence of the N-terminal propeptide | None | [(Joukov et al. 1997)](https://paperpile.com/c/mIUAVE/g3IH) | 1:500 |
| AS 885 | peptide (aa 120-136): NH2-KSIDNEWRKTQ CMPREV = N-terminal sequence of hypo- thetical shortest active form of mature VEGF-C | None | In-house | 1:250 |
| AS 890 | peptide (aa 372-394): NH2-KGKKFHHQTCS CYRRPCTNRQKA = internal peptide close to the C-terminus of the silk homology domain | None | In-house | 1:250 |
| AS no. 3/4 | histagged, human VEGF-C (aa 103-215) produced in HighFive cells | None | In-house | 1:1000 |
| *Polyclonal antibodies* | | | | |
| [ab9546](https://www.abcam.com/vegfc-antibody-ab9546.html) | rat VEGF-C protein (aa 101-221) produced in insect cells | protein A-purified | Abcam | 1:1000 |
| [ab135506](https://www.abcam.com/vegfc-antibody-ab135506.html) | recombinant human VEGF-C protein (aa 1-290) | protein A and peptide affinity-purified | Abcam | 1:1000 |
| [NB110-61022](https://www.novusbio.com/products/vegf-c-antibody_nb110-61022) | purified, recombinant rat VEGF-C protein (aa 101-221) | protein G purified | Novus (Biotechne) | 1:1000 |
| [#2445](https://www.cellsignal.com/products/primary-antibodies/vegf-c-antibody/2445) | peptide (residues surrounding Thr189 of human VEGF-C) | protein A and peptide affinity-purified | Cell Signaling Technology | 1:1000 |
| [PA5-29772](https://www.thermofisher.com/antibody/product/VEGFC-Antibody-Polyclonal/PA5-29772) | human VEGF-C protein (aa 180-414) | antigen affinity purified | Invitrogen/ ThermoFisher | 1:500 |
| [SAB1303101](https://www.sigmaaldrich.com/catalog/product/sigma/sab1303101) | recombinant human VEGF-C protein (aa 1-290) | affinity-purified | Sigma-Aldrich/ Merck | 1:500 |
| [SAB1303607](https://www.sigmaaldrich.com/catalog/product/sigma/sab1303607) | a synthetic peptide located between aa 248-277 | affinity-purified | Sigma-Aldrich/ Merck | 1:500 |
| [AF752](https://www.rndsystems.com/products/human-vegf-c-antibody_af752) | recombinant human VEGF-C produced in *E. coli* (aa 104-330) | antigen affinity-purified | R&D Systems (Biotechne) | 1:1000 |
| *Monoclonal antibodies* | | | | |
| [sc-374628](https://www.scbt.com/scbt/product/vegf-c-antibody-e-6) | peptide (aa 103-137): NH2-TEETIKFAAAHY NTEILKSIDNEWRKTQCMPREVC =  N-terminus of minor, mature VEGF-C | protein A-purified | Santa Cruz Biotechnology | 1:500 |
| [sc-101583](https://www.scbt.com/scbt/product/vegf-c-antibody-mm0006-2e65) | raised against recombinant human VEGF-C protein (aa ???-???) | protein A-purified | Santa Cruz Biotechnology | 1:500 |
| [MAB752](https://www.rndsystems.com/products/human-vegf-c-antibody-193208_mab752) | recombinant human VEGF-C protein (C156S mutant, aa 103-227) produced in the mouse myeloma cell line NS0 | protein A/G purified from hybridoma sup | R&D Systems (Biotechne) | 1:500 |
| [MA5-26494](https://www.thermofisher.com/antibody/product/VEGFC-Antibody-clone-OTI4A1-Monoclonal/MA5-26494) | recombinant major, mature form of human VEGF-C (aa 112-227) produced in *E. coli* | affinity purified | Invitrogen/ ThermoFisher | 1:200 |
| [SAB1306762](https://www.sigmaaldrich.com/catalog/product/sigma/sab1306762) | recombinant human VEGF-C protein (aa 1-290) | purified from hybridoma | Sigma-Aldrich/ Merck | 1:100 |
