# Supplementary material for: KLK3/PSA and cathepsin D activate VEGF-C and VEGF-D
Source: eLife journal article supplement (doi:10.7554/elife.44478), 2019-05-17
Supplement: supp [file elife-44478-supp-v1.zip › elife_poa_e44478_Supplementary_file_2.xlsx]

## Sheet: Sample #1
Accession	Description	Score	Coverage	# Unique Peptides	# Peptides	# PSMs	# AAs	MW [kDa]
P01833	Polymeric immunoglobulin receptor OS=Homo sapiens GN=PIGR PE=1 SV=4 - [PIGR_HUMAN]	869.03	25.92	17	17	19	764	83.2317
P54108	Cysteine-rich secretory protein 3 OS=Homo sapiens GN=CRISP3 PE=1 SV=1 - [CRIS3_HUMAN]	823.3	64.49	22	22	119	245	27.612
P80188	Neutrophil gelatinase-associated lipocalin OS=Homo sapiens GN=LCN2 PE=1 SV=2 - [NGAL_HUMAN]	762.4	71.21	16	16	44	198	22.5737
P04745	Alpha-amylase 1 OS=Homo sapiens GN=AMY1A PE=1 SV=2 - [AMY1_HUMAN]	725.96	34.44	14	14	17	511	57.7309
P02768	Serum albumin OS=Homo sapiens GN=ALB PE=1 SV=2 - [ALBU_HUMAN]	695.07	26.93	17	17	21	609	69.3215
P35908	Keratin, type II cytoskeletal 2 epidermal OS=Homo sapiens GN=KRT2 PE=1 SV=2 - [K22E_HUMAN]	683.96	30.52	12	14	14	639	65.3932
P01834	Ig kappa chain C region OS=Homo sapiens GN=IGKC PE=1 SV=1 - [IGKC_HUMAN]	674.95	100	12	12	117	106	11.6017
P25311	Zinc-alpha-2-glycoprotein OS=Homo sapiens GN=AZGP1 PE=1 SV=2 - [ZA2G_HUMAN]	654.83	56.04	15	15	20	298	34.2371
P0CG05	Ig lambda-2 chain C regions OS=Homo sapiens GN=IGLC2 PE=1 SV=1 - [LAC2_HUMAN]	642.69	96.23	5	11	85	106	11.2865
Q96DA0	Zymogen granule protein 16 homolog B OS=Homo sapiens GN=ZG16B PE=1 SV=3 - [ZG16B_HUMAN]	629.85	55.29	13	13	109	208	22.7246
P13645	Keratin, type I cytoskeletal 10 OS=Homo sapiens GN=KRT10 PE=1 SV=6 - [K1C10_HUMAN]	622.49	21.06	10	11	11	584	58.7917
Q96DR5	BPI fold-containing family A member 2 OS=Homo sapiens GN=BPIFA2 PE=1 SV=2 - [BPIA2_HUMAN]	600.19	44.58	14	14	17	249	26.9947
P22079	Lactoperoxidase OS=Homo sapiens GN=LPO PE=1 SV=2 - [PERL_HUMAN]	600.08	21.91	16	16	20	712	80.2369
B9A064	Immunoglobulin lambda-like polypeptide 5 OS=Homo sapiens GN=IGLL5 PE=2 SV=2 - [IGLL5_HUMAN]	592.6	51.4	5	11	56	214	23.0486
P01876	Ig alpha-1 chain C region OS=Homo sapiens GN=IGHA1 PE=1 SV=2 - [IGHA1_HUMAN]	574.12	36.83	4	12	22	353	37.6306
P01877	Ig alpha-2 chain C region OS=Homo sapiens GN=IGHA2 PE=1 SV=3 - [IGHA2_HUMAN]	493.31	32.65	2	10	20	340	36.503
Q9UGM3	Deleted in malignant brain tumors 1 protein OS=Homo sapiens GN=DMBT1 PE=1 SV=2 - [DMBT1_HUMAN]	480.85	12.31	12	12	13	2413	260.569
P01591	Immunoglobulin J chain OS=Homo sapiens GN=IGJ PE=1 SV=4 - [IGJ_HUMAN]	472.58	48.43	11	11	33	159	18.087
P01011	Alpha-1-antichymotrypsin OS=Homo sapiens GN=SERPINA3 PE=1 SV=2 - [AACT_HUMAN]	457.02	25.06	12	12	13	423	47.6205
P22894	Neutrophil collagenase OS=Homo sapiens GN=MMP8 PE=1 SV=1 - [MMP8_HUMAN]	447.14	23.13	12	12	15	467	53.3785
P01857	Ig gamma-1 chain C region OS=Homo sapiens GN=IGHG1 PE=1 SV=1 - [IGHG1_HUMAN]	445.62	46.06	4	11	17	330	36.0832
P12273	Prolactin-inducible protein OS=Homo sapiens GN=PIP PE=1 SV=1 - [PIP_HUMAN]	445.38	65.07	9	9	11	146	16.5618
P01623	Ig kappa chain V-III region WOL OS=Homo sapiens PE=1 SV=1 - [KV305_HUMAN]	439.98	62.39	3	9	29	109	11.7389
P04206	Ig kappa chain V-III region GOL OS=Homo sapiens PE=1 SV=1 - [KV307_HUMAN]	431.39	87.16	3	9	26	109	11.823
P04264	Keratin, type II cytoskeletal 1 OS=Homo sapiens GN=KRT1 PE=1 SV=6 - [K2C1_HUMAN]	417.14	15.06	6	8	10	644	65.999
P61626	Lysozyme C OS=Homo sapiens GN=LYZ PE=1 SV=1 - [LYSC_HUMAN]	416.5	66.89	10	10	15	148	16.5263
P01622	Ig kappa chain V-III region Ti OS=Homo sapiens PE=1 SV=1 - [KV304_HUMAN]	409.15	76.15	2	8	26	109	11.7809
Q6P5S2	UPF0762 protein C6orf58 OS=Homo sapiens GN=C6orf58 PE=1 SV=2 - [CF058_HUMAN]	387.24	31.52	9	9	13	330	37.9016
P01859	Ig gamma-2 chain C region OS=Homo sapiens GN=IGHG2 PE=1 SV=2 - [IGHG2_HUMAN]	376.26	29.14	3	9	13	326	35.8778
Q06830	Peroxiredoxin-1 OS=Homo sapiens GN=PRDX1 PE=1 SV=1 - [PRDX1_HUMAN]	372.93	38.69	9	9	12	199	22.0963
P01860	Ig gamma-3 chain C region OS=Homo sapiens GN=IGHG3 PE=1 SV=2 - [IGHG3_HUMAN]	349.25	31.83	2	10	12	377	41.2604
P25774	Cathepsin S OS=Homo sapiens GN=CTSS PE=1 SV=3 - [CATS_HUMAN]	347.81	22.96	7	7	7	331	37.4713
P01861	Ig gamma-4 chain C region OS=Homo sapiens GN=IGHG4 PE=1 SV=1 - [IGHG4_HUMAN]	344.77	35.17	2	9	10	327	35.9179
Q8N4F0	BPI fold-containing family B member 2 OS=Homo sapiens GN=BPIFB2 PE=1 SV=2 - [BPIB2_HUMAN]	329.01	20.31	7	8	12	458	49.1417
Q92876	Kallikrein-6 OS=Homo sapiens GN=KLK6 PE=1 SV=1 - [KLK6_HUMAN]	289.47	38.93	7	7	11	244	26.8384
P02790	Hemopexin OS=Homo sapiens GN=HPX PE=1 SV=2 - [HEMO_HUMAN]	288.45	19.48	8	8	10	462	51.6433
P05090	Apolipoprotein D OS=Homo sapiens GN=APOD PE=1 SV=1 - [APOD_HUMAN]	282.21	34.92	6	6	7	189	21.2618
P35527	Keratin, type I cytoskeletal 9 OS=Homo sapiens GN=KRT9 PE=1 SV=3 - [K1C9_HUMAN]	271.6	7.87	3	4	4	623	62.0268
P09228	Cystatin-SA OS=Homo sapiens GN=CST2 PE=1 SV=1 - [CYTT_HUMAN]	270.41	42.55	3	6	7	141	16.4342
P01033	Metalloproteinase inhibitor 1 OS=Homo sapiens GN=TIMP1 PE=1 SV=1 - [TIMP1_HUMAN]	269.93	40.1	6	6	8	207	23.1555
P01610	Ig kappa chain V-I region WEA OS=Homo sapiens PE=1 SV=1 - [KV118_HUMAN]	257.97	42.59	2	5	12	108	11.8328
P01036	Cystatin-S OS=Homo sapiens GN=CST4 PE=1 SV=3 - [CYTS_HUMAN]	250.24	48.94	2	6	8	141	16.204
P80748	Ig lambda chain V-III region LOI OS=Homo sapiens PE=1 SV=1 - [LV302_HUMAN]	236.9	45.95	4	4	7	111	11.9278
P01624	Ig kappa chain V-III region POM OS=Homo sapiens PE=1 SV=1 - [KV306_HUMAN]	226.98	41.28	2	5	9	109	11.9149
Q99497	Protein DJ-1 OS=Homo sapiens GN=PARK7 PE=1 SV=2 - [PARK7_HUMAN]	220.12	32.28	5	5	5	189	19.8785
P01625	Ig kappa chain V-IV region Len OS=Homo sapiens PE=1 SV=2 - [KV402_HUMAN]	219.14	40.35	4	4	10	114	12.6322
P01598	Ig kappa chain V-I region EU OS=Homo sapiens PE=1 SV=1 - [KV106_HUMAN]	216.9	37.04	2	4	13	108	11.7808
P01599	Ig kappa chain V-I region Gal OS=Homo sapiens PE=1 SV=1 - [KV107_HUMAN]	216.7	43.52	2	5	14	108	11.8069
P01619	Ig kappa chain V-III region B6 OS=Homo sapiens PE=1 SV=1 - [KV301_HUMAN]	211.7	37.96	2	4	37	108	11.6278
Q9HC84	Mucin-5B OS=Homo sapiens GN=MUC5B PE=1 SV=3 - [MUC5B_HUMAN]	211.51	0.94	4	4	4	5762	595.96
P01596	Ig kappa chain V-I region CAR OS=Homo sapiens PE=1 SV=1 - [KV104_HUMAN]	210.52	53.27	4	5	15	107	11.6963
P01009	Alpha-1-antitrypsin OS=Homo sapiens GN=SERPINA1 PE=1 SV=3 - [A1AT_HUMAN]	209.12	14.83	6	6	6	418	46.707
P01617	Ig kappa chain V-II region TEW OS=Homo sapiens PE=1 SV=1 - [KV204_HUMAN]	202.45	38.94	3	4	12	113	12.3082
P01765	Ig heavy chain V-III region TIL OS=Homo sapiens PE=1 SV=1 - [HV304_HUMAN]	196.2	30.43	3	3	3	115	12.3481
P32119	Peroxiredoxin-2 OS=Homo sapiens GN=PRDX2 PE=1 SV=5 - [PRDX2_HUMAN]	193.01	25.25	6	6	6	198	21.8782
P01700	Ig lambda chain V-I region HA OS=Homo sapiens PE=1 SV=1 - [LV102_HUMAN]	189.63	30.36	2	5	13	112	11.8889
P04433	Ig kappa chain V-III region VG (Fragment) OS=Homo sapiens PE=1 SV=1 - [KV309_HUMAN]	181.45	37.39	2	4	10	115	12.5673
Q6P4A8	Phospholipase B-like 1 OS=Homo sapiens GN=PLBD1 PE=1 SV=2 - [PLBL1_HUMAN]	179.63	7.23	4	4	4	553	63.2142
P23280	Carbonic anhydrase 6 OS=Homo sapiens GN=CA6 PE=1 SV=3 - [CAH6_HUMAN]	179.3	14.29	4	4	8	308	35.3446
Q9UL52	Transmembrane protease serine 11E OS=Homo sapiens GN=TMPRSS11E PE=1 SV=2 - [TM11E_HUMAN]	169.26	8.98	3	3	3	423	47.6651
P02774	Vitamin D-binding protein OS=Homo sapiens GN=GC PE=1 SV=1 - [VTDB_HUMAN]	168.68	14.35	4	4	5	474	52.929
P01602	Ig kappa chain V-I region HK102 (Fragment) OS=Homo sapiens GN=IGKV1-5 PE=4 SV=1 - [KV110_HUMAN]	167	34.19	2	3	4	117	12.7603
Q96BQ1	Protein FAM3D OS=Homo sapiens GN=FAM3D PE=1 SV=1 - [FAM3D_HUMAN]	162.56	16.96	4	4	4	224	24.9468
P07602	Proactivator polypeptide OS=Homo sapiens GN=PSAP PE=1 SV=2 - [SAP_HUMAN]	159.44	8.97	3	3	4	524	58.0739
P01608	Ig kappa chain V-I region Roy OS=Homo sapiens PE=1 SV=1 - [KV116_HUMAN]	157.32	31.48	2	3	10	108	11.7748
P01613	Ig kappa chain V-I region Ni OS=Homo sapiens PE=1 SV=1 - [KV121_HUMAN]	153.05	30.36	2	2	10	112	12.238
P01037	Cystatin-SN OS=Homo sapiens GN=CST1 PE=1 SV=3 - [CYTN_HUMAN]	153.01	44.68	2	4	7	141	16.3773
P01597	Ig kappa chain V-I region DEE OS=Homo sapiens PE=1 SV=1 - [KV105_HUMAN]	146.13	32.41	2	4	20	108	11.6538
P04208	Ig lambda chain V-I region WAH OS=Homo sapiens PE=1 SV=1 - [LV106_HUMAN]	135.57	26.61	1	3	6	109	11.7177
P01616	Ig kappa chain V-II region MIL OS=Homo sapiens PE=1 SV=1 - [KV203_HUMAN]	130.96	33.04	1	2	4	112	12.0481
Q96S96	Phosphatidylethanolamine-binding protein 4 OS=Homo sapiens GN=PEBP4 PE=1 SV=3 - [PEBP4_HUMAN]	129.27	11.01	3	3	4	227	25.7168
P01606	Ig kappa chain V-I region OU OS=Homo sapiens PE=1 SV=1 - [KV114_HUMAN]	127.43	22.22	1	3	15	108	11.7697
P01612	Ig kappa chain V-I region Mev OS=Homo sapiens PE=1 SV=1 - [KV120_HUMAN]	126.33	22.02	2	2	4	109	11.8628
A8K2U0	Alpha-2-macroglobulin-like protein 1 OS=Homo sapiens GN=A2ML1 PE=1 SV=3 - [A2ML1_HUMAN]	124.97	3.71	4	4	4	1454	161.004
P01701	Ig lambda chain V-I region NEW OS=Homo sapiens PE=1 SV=1 - [LV103_HUMAN]	124.21	26.13	2	3	3	111	11.4457
P01604	Ig kappa chain V-I region Kue OS=Homo sapiens PE=1 SV=1 - [KV112_HUMAN]	123.32	37.04	2	4	6	108	12.119
P12109	Collagen alpha-1(VI) chain OS=Homo sapiens GN=COL6A1 PE=1 SV=3 - [CO6A1_HUMAN]	123.11	4.57	4	4	4	1028	108.462
P01719	Ig lambda chain V-V region DEL OS=Homo sapiens PE=1 SV=1 - [LV501_HUMAN]	117.05	31.48	2	2	2	108	11.3356
O60235	Transmembrane protease serine 11D OS=Homo sapiens GN=TMPRSS11D PE=1 SV=1 - [TM11D_HUMAN]	116.86	7.18	3	3	3	418	46.2344
P29508	Serpin B3 OS=Homo sapiens GN=SERPINB3 PE=1 SV=2 - [SPB3_HUMAN]	115.61	5.64	2	2	2	390	44.5365
P0CG48	Polyubiquitin-C OS=Homo sapiens GN=UBC PE=1 SV=3 - [UBC_HUMAN]	114.04	45.99	3	3	4	685	76.9915
P30740	Leukocyte elastase inhibitor OS=Homo sapiens GN=SERPINB1 PE=1 SV=1 - [ILEU_HUMAN]	112.5	6.6	2	2	2	379	42.7147
P07477	Trypsin-1 OS=Homo sapiens GN=PRSS1 PE=1 SV=1 - [TRY1_HUMAN]	103.04	14.57	2	2	2	247	26.5411
P00751	Complement factor B OS=Homo sapiens GN=CFB PE=1 SV=2 - [CFAB_HUMAN]	101.66	2.62	2	2	3	764	85.4785
P01702	Ig lambda chain V-I region NIG-64 OS=Homo sapiens PE=1 SV=1 - [LV104_HUMAN]	94	18.92	3	4	4	111	11.4465
P01707	Ig lambda chain V-II region TRO OS=Homo sapiens PE=1 SV=1 - [LV204_HUMAN]	93.69	26.13	2	3	9	111	11.5536
P02763	Alpha-1-acid glycoprotein 1 OS=Homo sapiens GN=ORM1 PE=1 SV=1 - [A1AG1_HUMAN]	93.42	11.44	2	2	2	201	23.4968
P05109	Protein S100-A8 OS=Homo sapiens GN=S100A8 PE=1 SV=1 - [S10A8_HUMAN]	89.51	29.03	3	3	3	93	10.8276
P24158	Myeloblastin OS=Homo sapiens GN=PRTN3 PE=1 SV=3 - [PRTN3_HUMAN]	86.1	8.2	2	2	2	256	27.7893
P15328	Folate receptor alpha OS=Homo sapiens GN=FOLR1 PE=1 SV=3 - [FOLR1_HUMAN]	80.15	7.39	2	2	2	257	29.7992
Q9UBX7	Kallikrein-11 OS=Homo sapiens GN=KLK11 PE=1 SV=2 - [KLK11_HUMAN]	79.95	8.16	2	2	2	282	31.0388
P01699	Ig lambda chain V-I region VOR OS=Homo sapiens PE=1 SV=1 - [LV101_HUMAN]	78.9	18.92	3	3	3	111	11.5075
P60033	CD81 antigen OS=Homo sapiens GN=CD81 PE=1 SV=1 - [CD81_HUMAN]	77.29	16.53	2	2	2	236	25.7921
P01714	Ig lambda chain V-III region SH OS=Homo sapiens PE=1 SV=1 - [LV301_HUMAN]	76.64	17.59	2	2	2	108	11.3856
P01615	Ig kappa chain V-II region FR OS=Homo sapiens PE=1 SV=1 - [KV202_HUMAN]	75.92	18.58	2	2	2	113	12.6517
Q99665	Interleukin-12 receptor subunit beta-2 OS=Homo sapiens GN=IL12RB2 PE=1 SV=1 - [I12R2_HUMAN]	75.59	0.93	1	2	4	862	97.0731
P06317	Ig lambda chain V-VI region SUT OS=Homo sapiens PE=1 SV=1 - [LV603_HUMAN]	74.77	13.51	2	2	2	111	12.2398
P04211	Ig lambda chain V region 4A OS=Homo sapiens PE=4 SV=1 - [LV001_HUMAN]	74.49	13.68	2	2	3	117	12.372
P07339	Cathepsin D OS=Homo sapiens GN=CTSD PE=1 SV=1 - [CATD_HUMAN]	68.7	10.92	3	3	3	412	44.5236
P07686	Beta-hexosaminidase subunit beta OS=Homo sapiens GN=HEXB PE=1 SV=3 - [HEXB_HUMAN]	68.15	3.42	3	3	3	556	63.0712
P07858	Cathepsin B OS=Homo sapiens GN=CTSB PE=1 SV=3 - [CATB_HUMAN]	67.87	8.26	2	2	2	339	37.7968
Q9UBC9	Small proline-rich protein 3 OS=Homo sapiens GN=SPRR3 PE=1 SV=2 - [SPRR3_HUMAN]	67.5	9.47	2	2	2	169	18.1422
P28325	Cystatin-D OS=Homo sapiens GN=CST5 PE=1 SV=1 - [CYTD_HUMAN]	67.19	15.49	2	2	2	142	16.0699
O00584	Ribonuclease T2 OS=Homo sapiens GN=RNASET2 PE=1 SV=2 - [RNT2_HUMAN]	62.98	12.11	2	2	2	256	29.4618

## Sheet: Sample #2
Accession	Description	Score	Coverage	# Unique Peptides	# Peptides	# PSMs	# AAs	MW [kDa]
P02768	Serum albumin OS=Homo sapiens GN=ALB PE=1 SV=2 - [ALBU_HUMAN]	1227.53	52.87	30	30	39	609	69.3215
P01833	Polymeric immunoglobulin receptor OS=Homo sapiens GN=PIGR PE=1 SV=4 - [PIGR_HUMAN]	1033.02	32.72	22	22	27	764	83.2317
P04745	Alpha-amylase 1 OS=Homo sapiens GN=AMY1A PE=1 SV=2 - [AMY1_HUMAN]	800.17	38.55	17	17	26	511	57.7309
P54108	Cysteine-rich secretory protein 3 OS=Homo sapiens GN=CRISP3 PE=1 SV=1 - [CRIS3_HUMAN]	771.84	78.78	22	22	102	245	27.612
P25311	Zinc-alpha-2-glycoprotein OS=Homo sapiens GN=AZGP1 PE=1 SV=2 - [ZA2G_HUMAN]	768.54	53.02	17	17	28	298	34.2371
P01834	Ig kappa chain C region OS=Homo sapiens GN=IGKC PE=1 SV=1 - [IGKC_HUMAN]	700.21	100	12	12	121	106	11.6017
P04264	Keratin, type II cytoskeletal 1 OS=Homo sapiens GN=KRT1 PE=1 SV=6 - [K2C1_HUMAN]	697.72	21.74	11	13	17	644	65.999
P22079	Lactoperoxidase OS=Homo sapiens GN=LPO PE=1 SV=2 - [PERL_HUMAN]	691.27	25	17	17	27	712	80.2369
P01876	Ig alpha-1 chain C region OS=Homo sapiens GN=IGHA1 PE=1 SV=2 - [IGHA1_HUMAN]	597.86	38.81	4	13	18	353	37.6306
P0CG05	Ig lambda-2 chain C regions OS=Homo sapiens GN=IGLC2 PE=1 SV=1 - [LAC2_HUMAN]	588.87	69.81	5	10	73	106	11.2865
Q96DR5	BPI fold-containing family A member 2 OS=Homo sapiens GN=BPIFA2 PE=1 SV=2 - [BPIA2_HUMAN]	552.96	43.78	13	13	17	249	26.9947
P35527	Keratin, type I cytoskeletal 9 OS=Homo sapiens GN=KRT9 PE=1 SV=3 - [K1C9_HUMAN]	552.32	24.72	10	11	13	623	62.0268
B9A064	Immunoglobulin lambda-like polypeptide 5 OS=Homo sapiens GN=IGLL5 PE=2 SV=2 - [IGLL5_HUMAN]	539.52	38.32	5	10	49	214	23.0486
P01877	Ig alpha-2 chain C region OS=Homo sapiens GN=IGHA2 PE=1 SV=3 - [IGHA2_HUMAN]	515.74	43.53	3	12	17	340	36.503
Q96DA0	Zymogen granule protein 16 homolog B OS=Homo sapiens GN=ZG16B PE=1 SV=3 - [ZG16B_HUMAN]	492.88	36.06	10	10	54	208	22.7246
P13645	Keratin, type I cytoskeletal 10 OS=Homo sapiens GN=KRT10 PE=1 SV=6 - [K1C10_HUMAN]	472.01	15.92	6	9	9	584	58.7917
P01857	Ig gamma-1 chain C region OS=Homo sapiens GN=IGHG1 PE=1 SV=1 - [IGHG1_HUMAN]	468.67	46.36	6	11	15	330	36.0832
A8K2U0	Alpha-2-macroglobulin-like protein 1 OS=Homo sapiens GN=A2ML1 PE=1 SV=3 - [A2ML1_HUMAN]	456.48	7.08	9	9	10	1454	161.004
Q6P5S2	UPF0762 protein C6orf58 OS=Homo sapiens GN=C6orf58 PE=1 SV=2 - [CF058_HUMAN]	442.25	27.27	10	10	14	330	37.9016
Q9UGM3	Deleted in malignant brain tumors 1 protein OS=Homo sapiens GN=DMBT1 PE=1 SV=2 - [DMBT1_HUMAN]	427.33	12.68	11	11	11	2413	260.569
P22894	Neutrophil collagenase OS=Homo sapiens GN=MMP8 PE=1 SV=1 - [MMP8_HUMAN]	425.06	22.7	11	11	12	467	53.3785
P02751	Fibronectin OS=Homo sapiens GN=FN1 PE=1 SV=4 - [FINC_HUMAN]	420.54	4.95	11	11	11	2386	262.46
P04206	Ig kappa chain V-III region GOL OS=Homo sapiens PE=1 SV=1 - [KV307_HUMAN]	420.29	93.58	4	9	25	109	11.823
P61626	Lysozyme C OS=Homo sapiens GN=LYZ PE=1 SV=1 - [LYSC_HUMAN]	412.97	66.89	10	10	13	148	16.5263
P01009	Alpha-1-antitrypsin OS=Homo sapiens GN=SERPINA1 PE=1 SV=3 - [A1AT_HUMAN]	388.14	19.38	8	8	10	418	46.707
P01623	Ig kappa chain V-III region WOL OS=Homo sapiens PE=1 SV=1 - [KV305_HUMAN]	380.82	62.39	3	8	27	109	11.7389
P80188	Neutrophil gelatinase-associated lipocalin OS=Homo sapiens GN=LCN2 PE=1 SV=2 - [NGAL_HUMAN]	377.03	55.05	10	10	12	198	22.5737
P25774	Cathepsin S OS=Homo sapiens GN=CTSS PE=1 SV=3 - [CATS_HUMAN]	357.96	24.77	7	7	7	331	37.4713
P01860	Ig gamma-3 chain C region OS=Homo sapiens GN=IGHG3 PE=1 SV=2 - [IGHG3_HUMAN]	357.55	30.5	2	8	11	377	41.2604
P12273	Prolactin-inducible protein OS=Homo sapiens GN=PIP PE=1 SV=1 - [PIP_HUMAN]	352.76	47.95	7	7	7	146	16.5618
P23280	Carbonic anhydrase 6 OS=Homo sapiens GN=CA6 PE=1 SV=3 - [CAH6_HUMAN]	352.52	37.34	10	10	21	308	35.3446
P07339	Cathepsin D OS=Homo sapiens GN=CTSD PE=1 SV=1 - [CATD_HUMAN]	348.59	24.27	8	8	11	412	44.5236
P29508	Serpin B3 OS=Homo sapiens GN=SERPINB3 PE=1 SV=2 - [SPB3_HUMAN]	345.04	18.97	7	7	7	390	44.5365
P01861	Ig gamma-4 chain C region OS=Homo sapiens GN=IGHG4 PE=1 SV=1 - [IGHG4_HUMAN]	343.49	29.36	4	8	12	327	35.9179
P01622	Ig kappa chain V-III region Ti OS=Homo sapiens PE=1 SV=1 - [KV304_HUMAN]	342.24	76.15	2	7	22	109	11.7809
P35908	Keratin, type II cytoskeletal 2 epidermal OS=Homo sapiens GN=KRT2 PE=1 SV=2 - [K22E_HUMAN]	332.96	14.08	4	7	7	639	65.3932
Q92876	Kallikrein-6 OS=Homo sapiens GN=KLK6 PE=1 SV=1 - [KLK6_HUMAN]	314.18	47.13	8	8	12	244	26.8384
Q8N4F0	BPI fold-containing family B member 2 OS=Homo sapiens GN=BPIFB2 PE=1 SV=2 - [BPIB2_HUMAN]	301.23	18.78	7	7	10	458	49.1417
P01011	Alpha-1-antichymotrypsin OS=Homo sapiens GN=SERPINA3 PE=1 SV=2 - [AACT_HUMAN]	296.87	18.44	8	8	8	423	47.6205
P05090	Apolipoprotein D OS=Homo sapiens GN=APOD PE=1 SV=1 - [APOD_HUMAN]	294.37	31.22	7	7	8	189	21.2618
P01033	Metalloproteinase inhibitor 1 OS=Homo sapiens GN=TIMP1 PE=1 SV=1 - [TIMP1_HUMAN]	281.71	40.1	6	6	10	207	23.1555
P01610	Ig kappa chain V-I region WEA OS=Homo sapiens PE=1 SV=1 - [KV118_HUMAN]	274.07	42.59	3	5	14	108	11.8328
P01591	Immunoglobulin J chain OS=Homo sapiens GN=IGJ PE=1 SV=4 - [IGJ_HUMAN]	273.95	42.14	7	7	9	159	18.087
P08779	Keratin, type I cytoskeletal 16 OS=Homo sapiens GN=KRT16 PE=1 SV=4 - [K1C16_HUMAN]	273.03	16.7	4	7	7	473	51.2362
P01036	Cystatin-S OS=Homo sapiens GN=CST4 PE=1 SV=3 - [CYTS_HUMAN]	272.34	48.94	3	6	8	141	16.204
P01625	Ig kappa chain V-IV region Len OS=Homo sapiens PE=1 SV=2 - [KV402_HUMAN]	268.32	53.51	5	5	19	114	12.6322
P09228	Cystatin-SA OS=Homo sapiens GN=CST2 PE=1 SV=1 - [CYTT_HUMAN]	243.29	41.84	2	5	6	141	16.4342
P07602	Proactivator polypeptide OS=Homo sapiens GN=PSAP PE=1 SV=2 - [SAP_HUMAN]	242.75	14.12	6	6	7	524	58.0739
Q9UL52	Transmembrane protease serine 11E OS=Homo sapiens GN=TMPRSS11E PE=1 SV=2 - [TM11E_HUMAN]	238.4	17.49	6	6	8	423	47.6651
P02790	Hemopexin OS=Homo sapiens GN=HPX PE=1 SV=2 - [HEMO_HUMAN]	236.94	16.23	7	7	8	462	51.6433
P01621	Ig kappa chain V-III region NG9 (Fragment) OS=Homo sapiens PE=1 SV=1 - [KV303_HUMAN]	235.23	60	3	5	10	100	10.7223
P80748	Ig lambda chain V-III region LOI OS=Homo sapiens PE=1 SV=1 - [LV302_HUMAN]	223.19	45.95	4	4	4	111	11.9278
P01624	Ig kappa chain V-III region POM OS=Homo sapiens PE=1 SV=1 - [KV306_HUMAN]	221.3	41.28	2	5	10	109	11.9149
Q9HC84	Mucin-5B OS=Homo sapiens GN=MUC5B PE=1 SV=3 - [MUC5B_HUMAN]	217.41	0.92	4	4	4	5762	595.96
P01596	Ig kappa chain V-I region CAR OS=Homo sapiens PE=1 SV=1 - [KV104_HUMAN]	214.68	48.6	4	5	14	107	11.6963
P06310	Ig kappa chain V-II region RPMI 6410 OS=Homo sapiens PE=4 SV=1 - [KV206_HUMAN]	212.08	21.8	2	5	14	133	14.6974
P01766	Ig heavy chain V-III region BRO OS=Homo sapiens PE=1 SV=1 - [HV305_HUMAN]	208.93	38.33	2	4	5	120	13.2184
P01617	Ig kappa chain V-II region TEW OS=Homo sapiens PE=1 SV=1 - [KV204_HUMAN]	206.52	38.94	3	4	15	113	12.3082
P30740	Leukocyte elastase inhibitor OS=Homo sapiens GN=SERPINB1 PE=1 SV=1 - [ILEU_HUMAN]	205.06	15.3	5	5	6	379	42.7147
P63010	AP-2 complex subunit beta OS=Homo sapiens GN=AP2B1 PE=1 SV=1 - [AP2B1_HUMAN]	199.24	5.76	5	5	6	937	104.486
P01619	Ig kappa chain V-III region B6 OS=Homo sapiens PE=1 SV=1 - [KV301_HUMAN]	197.63	37.96	2	4	39	108	11.6278
P02774	Vitamin D-binding protein OS=Homo sapiens GN=GC PE=1 SV=1 - [VTDB_HUMAN]	190.95	18.99	5	5	6	474	52.929
Q9UBX7	Kallikrein-11 OS=Homo sapiens GN=KLK11 PE=1 SV=2 - [KLK11_HUMAN]	185.9	14.18	4	4	6	282	31.0388
P07711	Cathepsin L1 OS=Homo sapiens GN=CTSL1 PE=1 SV=2 - [CATL1_HUMAN]	183.08	13.51	4	4	4	333	37.5397
Q08188	Protein-glutamine gamma-glutamyltransferase E OS=Homo sapiens GN=TGM3 PE=1 SV=4 - [TGM3_HUMAN]	181.13	7.22	5	5	5	693	76.5836
P01700	Ig lambda chain V-I region HA OS=Homo sapiens PE=1 SV=1 - [LV102_HUMAN]	175.45	30.36	3	5	7	112	11.8889
P01781	Ig heavy chain V-III region GAL OS=Homo sapiens PE=1 SV=1 - [HV320_HUMAN]	175.35	31.03	3	4	5	116	12.7222
P01602	Ig kappa chain V-I region HK102 (Fragment) OS=Homo sapiens GN=IGKV1-5 PE=4 SV=1 - [KV110_HUMAN]	173.68	34.19	2	3	5	117	12.7603
P04433	Ig kappa chain V-III region VG (Fragment) OS=Homo sapiens PE=1 SV=1 - [KV309_HUMAN]	173.63	37.39	2	4	10	115	12.5673
P07858	Cathepsin B OS=Homo sapiens GN=CTSB PE=1 SV=3 - [CATB_HUMAN]	173.52	18.58	6	6	6	339	37.7968
P01598	Ig kappa chain V-I region EU OS=Homo sapiens PE=1 SV=1 - [KV106_HUMAN]	169.9	37.04	2	4	15	108	11.7808
P01613	Ig kappa chain V-I region Ni OS=Homo sapiens PE=1 SV=1 - [KV121_HUMAN]	167.19	30.36	2	2	12	112	12.238
Q96BQ1	Protein FAM3D OS=Homo sapiens GN=FAM3D PE=1 SV=1 - [FAM3D_HUMAN]	166.62	22.77	4	4	4	224	24.9468
P12109	Collagen alpha-1(VI) chain OS=Homo sapiens GN=COL6A1 PE=1 SV=3 - [CO6A1_HUMAN]	160.07	5.16	5	5	6	1028	108.462
P02538	Keratin, type II cytoskeletal 6A OS=Homo sapiens GN=KRT6A PE=1 SV=3 - [K2C6A_HUMAN]	158.82	5.14	2	3	3	564	60.0083
P01764	Ig heavy chain V-III region VH26 OS=Homo sapiens PE=1 SV=1 - [HV303_HUMAN]	158.32	23.08	2	3	3	117	12.5742
P07686	Beta-hexosaminidase subunit beta OS=Homo sapiens GN=HEXB PE=1 SV=3 - [HEXB_HUMAN]	155.8	10.61	7	7	7	556	63.0712
P01608	Ig kappa chain V-I region Roy OS=Homo sapiens PE=1 SV=1 - [KV116_HUMAN]	153.14	31.48	2	3	12	108	11.7748
P24158	Myeloblastin OS=Homo sapiens GN=PRTN3 PE=1 SV=3 - [PRTN3_HUMAN]	151.9	20.7	4	4	4	256	27.7893
Q9UBR2	Cathepsin Z OS=Homo sapiens GN=CTSZ PE=1 SV=1 - [CATZ_HUMAN]	148.13	7.26	2	2	2	303	33.8462
P01604	Ig kappa chain V-I region Kue OS=Homo sapiens PE=1 SV=1 - [KV112_HUMAN]	145.22	37.04	2	4	8	108	12.119
P19021	Peptidyl-glycine alpha-amidating monooxygenase OS=Homo sapiens GN=PAM PE=1 SV=2 - [AMD_HUMAN]	139.03	4.42	4	4	5	973	108.263
P01597	Ig kappa chain V-I region DEE OS=Homo sapiens PE=1 SV=1 - [KV105_HUMAN]	137.06	22.22	1	3	21	108	11.6538
O60235	Transmembrane protease serine 11D OS=Homo sapiens GN=TMPRSS11D PE=1 SV=1 - [TM11D_HUMAN]	136.63	7.18	3	3	3	418	46.2344
P01714	Ig lambda chain V-III region SH OS=Homo sapiens PE=1 SV=1 - [LV301_HUMAN]	132.47	34.26	3	3	3	108	11.3856
P06311	Ig kappa chain V-III region IARC/BL41 OS=Homo sapiens PE=1 SV=1 - [KV311_HUMAN]	129.93	24.22	2	2	2	128	14.0611
P01606	Ig kappa chain V-I region OU OS=Homo sapiens PE=1 SV=1 - [KV114_HUMAN]	127.9	22.22	1	3	17	108	11.7697
Q6P4A8	Phospholipase B-like 1 OS=Homo sapiens GN=PLBD1 PE=1 SV=2 - [PLBL1_HUMAN]	125.4	4.16	3	3	3	553	63.2142
Q96S96	Phosphatidylethanolamine-binding protein 4 OS=Homo sapiens GN=PEBP4 PE=1 SV=3 - [PEBP4_HUMAN]	125.26	11.01	3	3	3	227	25.7168
P01719	Ig lambda chain V-V region DEL OS=Homo sapiens PE=1 SV=1 - [LV501_HUMAN]	120.87	31.48	2	2	2	108	11.3356
P01024	Complement C3 OS=Homo sapiens GN=C3 PE=1 SV=2 - [CO3_HUMAN]	110.98	2.1	3	3	3	1663	187.03
P01612	Ig kappa chain V-I region Mev OS=Homo sapiens PE=1 SV=1 - [KV120_HUMAN]	110.15	22.02	2	2	5	109	11.8628
Q06830	Peroxiredoxin-1 OS=Homo sapiens GN=PRDX1 PE=1 SV=1 - [PRDX1_HUMAN]	109.39	15.08	3	3	3	199	22.0963
P01616	Ig kappa chain V-II region MIL OS=Homo sapiens PE=1 SV=1 - [KV203_HUMAN]	108.86	33.04	1	2	9	112	12.0481
P06870	Kallikrein-1 OS=Homo sapiens GN=KLK1 PE=1 SV=2 - [KLK1_HUMAN]	107.67	13.74	3	3	3	262	28.8709
P21926	CD9 antigen OS=Homo sapiens GN=CD9 PE=1 SV=4 - [CD9_HUMAN]	107.19	9.65	3	3	3	228	25.399
P22735	Protein-glutamine gamma-glutamyltransferase K OS=Homo sapiens GN=TGM1 PE=1 SV=4 - [TGM1_HUMAN]	105.69	2.82	2	2	2	817	89.7303
P01615	Ig kappa chain V-II region FR OS=Homo sapiens PE=1 SV=1 - [KV202_HUMAN]	105.15	24.78	2	3	3	113	12.6517
P78417	Glutathione S-transferase omega-1 OS=Homo sapiens GN=GSTO1 PE=1 SV=2 - [GSTO1_HUMAN]	104.87	11.62	3	3	3	241	27.548
P28799	Granulins OS=Homo sapiens GN=GRN PE=1 SV=2 - [GRN_HUMAN]	103.93	4.05	2	2	2	593	63.4998
P01701	Ig lambda chain V-I region NEW OS=Homo sapiens PE=1 SV=1 - [LV103_HUMAN]	103.06	26.13	3	3	3	111	11.4457
O00584	Ribonuclease T2 OS=Homo sapiens GN=RNASET2 PE=1 SV=2 - [RNT2_HUMAN]	100.37	14.45	3	3	3	256	29.4618
P01825	Ig heavy chain V-II region NEWM OS=Homo sapiens PE=1 SV=1 - [HV207_HUMAN]	96.13	18.8	2	2	2	117	12.7823
P01707	Ig lambda chain V-II region TRO OS=Homo sapiens PE=1 SV=1 - [LV204_HUMAN]	95.07	26.13	2	3	3	111	11.5536
O00391	Sulfhydryl oxidase 1 OS=Homo sapiens GN=QSOX1 PE=1 SV=3 - [QSOX1_HUMAN]	91.4	3.08	2	2	3	747	82.5255
Q9UKR3	Kallikrein-13 OS=Homo sapiens GN=KLK13 PE=1 SV=1 - [KLK13_HUMAN]	86.51	7.94	2	2	2	277	30.5505
P0CG48	Polyubiquitin-C OS=Homo sapiens GN=UBC PE=1 SV=3 - [UBC_HUMAN]	85.5	36.79	3	3	3	685	76.9915
P02749	Beta-2-glycoprotein 1 OS=Homo sapiens GN=APOH PE=1 SV=3 - [APOH_HUMAN]	82.8	8.99	2	2	2	345	38.2727
P01871	Ig mu chain C region OS=Homo sapiens GN=IGHM PE=1 SV=3 - [IGHM_HUMAN]	77.74	4.2	2	2	2	452	49.2755
P06317	Ig lambda chain V-VI region SUT OS=Homo sapiens PE=1 SV=1 - [LV603_HUMAN]	73.73	13.51	2	2	2	111	12.2398
P36980	Complement factor H-related protein 2 OS=Homo sapiens GN=CFHR2 PE=1 SV=1 - [FHR2_HUMAN]	72.88	6.67	2	2	2	270	30.6306
P28325	Cystatin-D OS=Homo sapiens GN=CST5 PE=1 SV=1 - [CYTD_HUMAN]	67.01	15.49	2	2	2	142	16.0699
Q16651	Prostasin OS=Homo sapiens GN=PRSS8 PE=1 SV=1 - [PRSS8_HUMAN]	54.26	6.12	2	2	2	343	36.4083
Q9UBC9	Small proline-rich protein 3 OS=Homo sapiens GN=SPRR3 PE=1 SV=2 - [SPRR3_HUMAN]	53.01	9.47	2	2	2	169	18.1422

## Sheet: Sample #3
Accession	Description	Score	Coverage	# Unique Peptides	# Peptides	# PSMs	# AAs	MW [kDa]
P02768	Serum albumin OS=Homo sapiens GN=ALB PE=1 SV=2 - [ALBU_HUMAN]	1757.41	58.78	41	41	57	609	69.3215
P04264	Keratin, type II cytoskeletal 1 OS=Homo sapiens GN=KRT1 PE=1 SV=6 - [K2C1_HUMAN]	1640.75	52.48	26	29	36	644	65.999
P35908	Keratin, type II cytoskeletal 2 epidermal OS=Homo sapiens GN=KRT2 PE=1 SV=2 - [K22E_HUMAN]	1339.82	44.29	18	24	25	639	65.3932
P13645	Keratin, type I cytoskeletal 10 OS=Homo sapiens GN=KRT10 PE=1 SV=6 - [K1C10_HUMAN]	1295.84	41.78	21	22	22	584	58.7917
P04745	Alpha-amylase 1 OS=Homo sapiens GN=AMY1A PE=1 SV=2 - [AMY1_HUMAN]	1189	53.82	24	24	42	511	57.7309
P35527	Keratin, type I cytoskeletal 9 OS=Homo sapiens GN=KRT9 PE=1 SV=3 - [K1C9_HUMAN]	1078.75	39	19	20	24	623	62.0268
P25311	Zinc-alpha-2-glycoprotein OS=Homo sapiens GN=AZGP1 PE=1 SV=2 - [ZA2G_HUMAN]	980.35	56.38	19	19	38	298	34.2371
Q96DR5	BPI fold-containing family A member 2 OS=Homo sapiens GN=BPIFA2 PE=1 SV=2 - [BPIA2_HUMAN]	867.74	54.22	18	18	55	249	26.9947
P29508	Serpin B3 OS=Homo sapiens GN=SERPINB3 PE=1 SV=2 - [SPB3_HUMAN]	809.04	42.31	17	17	21	390	44.5365
P07858	Cathepsin B OS=Homo sapiens GN=CTSB PE=1 SV=3 - [CATB_HUMAN]	795.01	39.23	16	16	29	339	37.7968
P01876	Ig alpha-1 chain C region OS=Homo sapiens GN=IGHA1 PE=1 SV=2 - [IGHA1_HUMAN]	740.88	42.21	4	15	33	353	37.6306
P01009	Alpha-1-antitrypsin OS=Homo sapiens GN=SERPINA1 PE=1 SV=3 - [A1AT_HUMAN]	710.44	40.67	18	18	22	418	46.707
P07339	Cathepsin D OS=Homo sapiens GN=CTSD PE=1 SV=1 - [CATD_HUMAN]	666.77	41.99	14	14	22	412	44.5236
Q6P5S2	UPF0762 protein C6orf58 OS=Homo sapiens GN=C6orf58 PE=1 SV=2 - [CF058_HUMAN]	642.35	43.64	15	15	29	330	37.9016
P01834	Ig kappa chain C region OS=Homo sapiens GN=IGKC PE=1 SV=1 - [IGKC_HUMAN]	614.25	100	11	11	80	106	11.6017
P01877	Ig alpha-2 chain C region OS=Homo sapiens GN=IGHA2 PE=1 SV=3 - [IGHA2_HUMAN]	600.22	47.06	3	14	34	340	36.503
P01857	Ig gamma-1 chain C region OS=Homo sapiens GN=IGHG1 PE=1 SV=1 - [IGHG1_HUMAN]	561.06	46.36	7	13	37	330	36.0832
P23280	Carbonic anhydrase 6 OS=Homo sapiens GN=CA6 PE=1 SV=3 - [CAH6_HUMAN]	542.81	34.09	11	11	56	308	35.3446
Q96DA0	Zymogen granule protein 16 homolog B OS=Homo sapiens GN=ZG16B PE=1 SV=3 - [ZG16B_HUMAN]	518.99	51.92	10	10	72	208	22.7246
P01860	Ig gamma-3 chain C region OS=Homo sapiens GN=IGHG3 PE=1 SV=2 - [IGHG3_HUMAN]	510.13	40.32	4	12	28	377	41.2604
B9A064	Immunoglobulin lambda-like polypeptide 5 OS=Homo sapiens GN=IGLL5 PE=2 SV=2 - [IGLL5_HUMAN]	498.62	38.32	5	10	44	214	23.0486
P25774	Cathepsin S OS=Homo sapiens GN=CTSS PE=1 SV=3 - [CATS_HUMAN]	495.34	35.65	11	11	12	331	37.4713
P01011	Alpha-1-antichymotrypsin OS=Homo sapiens GN=SERPINA3 PE=1 SV=2 - [AACT_HUMAN]	483.81	26.95	13	13	15	423	47.6205
P0CG05	Ig lambda-2 chain C regions OS=Homo sapiens GN=IGLC2 PE=1 SV=1 - [LAC2_HUMAN]	475.21	69.81	4	9	63	106	11.2865
P54108	Cysteine-rich secretory protein 3 OS=Homo sapiens GN=CRISP3 PE=1 SV=1 - [CRIS3_HUMAN]	465.45	45.31	14	14	38	245	27.612
P00738	Haptoglobin OS=Homo sapiens GN=HP PE=1 SV=1 - [HPT_HUMAN]	450.58	24.88	10	10	12	406	45.1766
Q8N4F0	BPI fold-containing family B member 2 OS=Homo sapiens GN=BPIFB2 PE=1 SV=2 - [BPIB2_HUMAN]	446.01	29.04	10	10	13	458	49.1417
P01871	Ig mu chain C region OS=Homo sapiens GN=IGHM PE=1 SV=3 - [IGHM_HUMAN]	441.55	23.89	10	10	17	452	49.2755
P61626	Lysozyme C OS=Homo sapiens GN=LYZ PE=1 SV=1 - [LYSC_HUMAN]	441	72.3	11	11	13	148	16.5263
Q9UIV8	Serpin B13 OS=Homo sapiens GN=SERPINB13 PE=2 SV=2 - [SPB13_HUMAN]	423.55	30.95	11	11	11	391	44.2482
O00584	Ribonuclease T2 OS=Homo sapiens GN=RNASET2 PE=1 SV=2 - [RNT2_HUMAN]	412.35	37.5	10	10	12	256	29.4618
Q9UBX7	Kallikrein-11 OS=Homo sapiens GN=KLK11 PE=1 SV=2 - [KLK11_HUMAN]	390.58	46.1	12	12	16	282	31.0388
P07602	Proactivator polypeptide OS=Homo sapiens GN=PSAP PE=1 SV=2 - [SAP_HUMAN]	389.63	20.23	11	11	13	524	58.0739
P01859	Ig gamma-2 chain C region OS=Homo sapiens GN=IGHG2 PE=1 SV=2 - [IGHG2_HUMAN]	354.54	33.74	4	10	24	326	35.8778
P01036	Cystatin-S OS=Homo sapiens GN=CST4 PE=1 SV=3 - [CYTS_HUMAN]	353.57	59.57	3	7	8	141	16.204
P02790	Hemopexin OS=Homo sapiens GN=HPX PE=1 SV=2 - [HEMO_HUMAN]	353.52	30.09	11	11	12	462	51.6433
P50897	Palmitoyl-protein thioesterase 1 OS=Homo sapiens GN=PPT1 PE=1 SV=1 - [PPT1_HUMAN]	343.93	27.45	8	8	11	306	34.1713
Q9UL52	Transmembrane protease serine 11E OS=Homo sapiens GN=TMPRSS11E PE=1 SV=2 - [TM11E_HUMAN]	341.97	17.49	7	7	12	423	47.6651
P07686	Beta-hexosaminidase subunit beta OS=Homo sapiens GN=HEXB PE=1 SV=3 - [HEXB_HUMAN]	338.65	17.99	10	10	11	556	63.0712
P01033	Metalloproteinase inhibitor 1 OS=Homo sapiens GN=TIMP1 PE=1 SV=1 - [TIMP1_HUMAN]	332.6	45.41	7	7	17	207	23.1555
P12273	Prolactin-inducible protein OS=Homo sapiens GN=PIP PE=1 SV=1 - [PIP_HUMAN]	302.68	47.95	6	6	7	146	16.5618
Q9UBR2	Cathepsin Z OS=Homo sapiens GN=CTSZ PE=1 SV=1 - [CATZ_HUMAN]	299.46	31.02	7	7	8	303	33.8462
P09228	Cystatin-SA OS=Homo sapiens GN=CST2 PE=1 SV=1 - [CYTT_HUMAN]	293.77	42.55	3	6	6	141	16.4342
P13647	Keratin, type II cytoskeletal 5 OS=Homo sapiens GN=KRT5 PE=1 SV=3 - [K2C5_HUMAN]	288.42	12.37	3	7	7	590	62.34
P05090	Apolipoprotein D OS=Homo sapiens GN=APOD PE=1 SV=1 - [APOD_HUMAN]	282.33	30.69	6	6	7	189	21.2618
P01861	Ig gamma-4 chain C region OS=Homo sapiens GN=IGHG4 PE=1 SV=1 - [IGHG4_HUMAN]	280.19	31.5	2	8	18	327	35.9179
P30740	Leukocyte elastase inhibitor OS=Homo sapiens GN=SERPINB1 PE=1 SV=1 - [ILEU_HUMAN]	271.75	16.89	5	5	5	379	42.7147
P01625	Ig kappa chain V-IV region Len OS=Homo sapiens PE=1 SV=2 - [KV402_HUMAN]	271.72	53.51	5	5	11	114	12.6322
Q08380	Galectin-3-binding protein OS=Homo sapiens GN=LGALS3BP PE=1 SV=1 - [LG3BP_HUMAN]	267.24	16.07	8	8	9	585	65.2893
P07711	Cathepsin L1 OS=Homo sapiens GN=CTSL1 PE=1 SV=2 - [CATL1_HUMAN]	259.85	16.22	6	6	7	333	37.5397
Q6ZMR5	Transmembrane protease serine 11A OS=Homo sapiens GN=TMPRSS11A PE=1 SV=1 - [TM11A_HUMAN]	257.01	15.91	8	8	10	421	47.5385
P06870	Kallikrein-1 OS=Homo sapiens GN=KLK1 PE=1 SV=2 - [KLK1_HUMAN]	251.28	19.85	6	6	9	262	28.8709
P01781	Ig heavy chain V-III region GAL OS=Homo sapiens PE=1 SV=1 - [HV320_HUMAN]	250.7	44.83	4	5	8	116	12.7222
Q92876	Kallikrein-6 OS=Homo sapiens GN=KLK6 PE=1 SV=1 - [KLK6_HUMAN]	247.12	40.98	7	7	11	244	26.8384
P01037	Cystatin-SN OS=Homo sapiens GN=CST1 PE=1 SV=3 - [CYTN_HUMAN]	243.62	45.39	2	4	5	141	16.3773
P80188	Neutrophil gelatinase-associated lipocalin OS=Homo sapiens GN=LCN2 PE=1 SV=2 - [NGAL_HUMAN]	242.28	32.83	5	5	5	198	22.5737
P01768	Ig heavy chain V-III region CAM OS=Homo sapiens PE=1 SV=1 - [HV307_HUMAN]	238.84	40.98	3	5	6	122	13.6592
P55058	Phospholipid transfer protein OS=Homo sapiens GN=PLTP PE=1 SV=1 - [PLTP_HUMAN]	238.18	11.76	6	6	8	493	54.7045
Q9UKR3	Kallikrein-13 OS=Homo sapiens GN=KLK13 PE=1 SV=1 - [KLK13_HUMAN]	237.81	19.49	5	5	6	277	30.5505
P21128	Poly(U)-specific endoribonuclease OS=Homo sapiens GN=ENDOU PE=1 SV=2 - [ENDOU_HUMAN]	232.21	19.76	6	6	7	410	46.8419
P01766	Ig heavy chain V-III region BRO OS=Homo sapiens PE=1 SV=1 - [HV305_HUMAN]	230.38	38.33	1	4	6	120	13.2184
P36980	Complement factor H-related protein 2 OS=Homo sapiens GN=CFHR2 PE=1 SV=1 - [FHR2_HUMAN]	230.02	15.19	4	4	4	270	30.6306
P01591	Immunoglobulin J chain OS=Homo sapiens GN=IGJ PE=1 SV=4 - [IGJ_HUMAN]	223.04	36.48	5	5	6	159	18.087
P01779	Ig heavy chain V-III region TUR OS=Homo sapiens PE=1 SV=1 - [HV318_HUMAN]	199.65	31.03	2	3	6	116	12.4233
P78417	Glutathione S-transferase omega-1 OS=Homo sapiens GN=GSTO1 PE=1 SV=2 - [GSTO1_HUMAN]	199.58	24.07	6	6	8	241	27.548
P80748	Ig lambda chain V-III region LOI OS=Homo sapiens PE=1 SV=1 - [LV302_HUMAN]	193.05	37.84	3	3	3	111	11.9278
P28799	Granulins OS=Homo sapiens GN=GRN PE=1 SV=2 - [GRN_HUMAN]	180.72	8.43	4	4	6	593	63.4998
P01620	Ig kappa chain V-III region SIE OS=Homo sapiens PE=1 SV=1 - [KV302_HUMAN]	173.91	36.7	1	4	6	109	11.7678
Q96S96	Phosphatidylethanolamine-binding protein 4 OS=Homo sapiens GN=PEBP4 PE=1 SV=3 - [PEBP4_HUMAN]	168.15	24.67	5	5	6	227	25.7168
P01617	Ig kappa chain V-II region TEW OS=Homo sapiens PE=1 SV=1 - [KV204_HUMAN]	167.79	38.94	3	3	5	113	12.3082
P01594	Ig kappa chain V-I region AU OS=Homo sapiens PE=1 SV=1 - [KV102_HUMAN]	160.44	31.48	1	2	6	108	11.9318
P01714	Ig lambda chain V-III region SH OS=Homo sapiens PE=1 SV=1 - [LV301_HUMAN]	160.29	34.26	3	3	5	108	11.3856
Q92820	Gamma-glutamyl hydrolase OS=Homo sapiens GN=GGH PE=1 SV=2 - [GGH_HUMAN]	155.78	14.78	5	5	6	318	35.9412
P28325	Cystatin-D OS=Homo sapiens GN=CST5 PE=1 SV=1 - [CYTD_HUMAN]	148.79	25.35	3	3	4	142	16.0699
P01596	Ig kappa chain V-I region CAR OS=Homo sapiens PE=1 SV=1 - [KV104_HUMAN]	147.72	26.17	3	3	8	107	11.6963
P24158	Myeloblastin OS=Homo sapiens GN=PRTN3 PE=1 SV=3 - [PRTN3_HUMAN]	143.17	20.7	4	4	4	256	27.7893
P02763	Alpha-1-acid glycoprotein 1 OS=Homo sapiens GN=ORM1 PE=1 SV=1 - [A1AG1_HUMAN]	142.09	23.38	4	4	4	201	23.4968
P02774	Vitamin D-binding protein OS=Homo sapiens GN=GC PE=1 SV=1 - [VTDB_HUMAN]	139.38	14.35	4	4	4	474	52.929
Q6P4A8	Phospholipase B-like 1 OS=Homo sapiens GN=PLBD1 PE=1 SV=2 - [PLBL1_HUMAN]	137.07	5.24	3	3	3	553	63.2142
Q96BQ1	Protein FAM3D OS=Homo sapiens GN=FAM3D PE=1 SV=1 - [FAM3D_HUMAN]	136.6	12.5	3	3	3	224	24.9468
Q16651	Prostasin OS=Homo sapiens GN=PRSS8 PE=1 SV=1 - [PRSS8_HUMAN]	136.59	11.66	3	3	4	343	36.4083
P10909	Clusterin OS=Homo sapiens GN=CLU PE=1 SV=1 - [CLUS_HUMAN]	132.44	7.35	4	4	4	449	52.461
P01612	Ig kappa chain V-I region Mev OS=Homo sapiens PE=1 SV=1 - [KV120_HUMAN]	131.56	22.02	2	2	4	109	11.8628
P10619	Lysosomal protective protein OS=Homo sapiens GN=CTSA PE=1 SV=2 - [PPGB_HUMAN]	126.85	10.83	4	4	4	480	54.4311
P02749	Beta-2-glycoprotein 1 OS=Homo sapiens GN=APOH PE=1 SV=3 - [APOH_HUMAN]	124.8	15.07	3	3	4	345	38.2727
P01611	Ig kappa chain V-I region Wes OS=Homo sapiens PE=1 SV=1 - [KV119_HUMAN]	122.93	31.48	2	2	4	108	11.6007
O43278	Kunitz-type protease inhibitor 1 OS=Homo sapiens GN=SPINT1 PE=1 SV=2 - [SPIT1_HUMAN]	118.75	8.13	4	4	4	529	58.3602
Q8WVQ1	Soluble calcium-activated nucleotidase 1 OS=Homo sapiens GN=CANT1 PE=1 SV=1 - [CANT1_HUMAN]	114.18	8.23	3	3	3	401	44.8117
P04433	Ig kappa chain V-III region VG (Fragment) OS=Homo sapiens PE=1 SV=1 - [KV309_HUMAN]	113.83	31.3	2	3	4	115	12.5673
P12429	Annexin A3 OS=Homo sapiens GN=ANXA3 PE=1 SV=3 - [ANXA3_HUMAN]	112.11	7.74	2	2	2	323	36.3527
P01619	Ig kappa chain V-III region B6 OS=Homo sapiens PE=1 SV=1 - [KV301_HUMAN]	109.94	23.15	1	3	14	108	11.6278
P02765	Alpha-2-HS-glycoprotein OS=Homo sapiens GN=AHSG PE=1 SV=1 - [FETUA_HUMAN]	106.2	13.35	3	3	3	367	39.2997
P04040	Catalase OS=Homo sapiens GN=CAT PE=1 SV=3 - [CATA_HUMAN]	102.24	3.98	2	2	2	527	59.7188
P01825	Ig heavy chain V-II region NEWM OS=Homo sapiens PE=1 SV=1 - [HV207_HUMAN]	101.72	18.8	2	2	2	117	12.7823
P06317	Ig lambda chain V-VI region SUT OS=Homo sapiens PE=1 SV=1 - [LV603_HUMAN]	99.05	20.72	2	2	5	111	12.2398
P43652	Afamin OS=Homo sapiens GN=AFM PE=1 SV=1 - [AFAM_HUMAN]	97.47	8.68	3	3	4	599	69.024
P43234	Cathepsin O OS=Homo sapiens GN=CTSO PE=2 SV=1 - [CATO_HUMAN]	97.09	7.17	2	2	2	321	35.9346
P01597	Ig kappa chain V-I region DEE OS=Homo sapiens PE=1 SV=1 - [KV105_HUMAN]	97.01	16.67	1	2	11	108	11.6538
P31025	Lipocalin-1 OS=Homo sapiens GN=LCN1 PE=1 SV=1 - [LCN1_HUMAN]	96.47	12.5	2	2	2	176	19.2378
Q9BS40	Latexin OS=Homo sapiens GN=LXN PE=1 SV=2 - [LXN_HUMAN]	96.33	16.67	3	3	3	222	25.7339
Q9H0W9	Ester hydrolase C11orf54 OS=Homo sapiens GN=C11orf54 PE=1 SV=1 - [CK054_HUMAN]	78.63	9.21	2	2	2	315	35.0946
P60709	Actin, cytoplasmic 1 OS=Homo sapiens GN=ACTB PE=1 SV=1 - [ACTB_HUMAN]	77.86	6.93	2	2	2	375	41.7097
P01604	Ig kappa chain V-I region Kue OS=Homo sapiens PE=1 SV=1 - [KV112_HUMAN]	77.46	14.81	2	2	3	108	12.119
P01814	Ig heavy chain V-II region OU OS=Homo sapiens PE=1 SV=1 - [HV201_HUMAN]	72.3	9.52	2	2	2	126	14.2668
P01615	Ig kappa chain V-II region FR OS=Homo sapiens PE=1 SV=1 - [KV202_HUMAN]	69.89	18.58	2	2	2	113	12.6517
P04196	Histidine-rich glycoprotein OS=Homo sapiens GN=HRG PE=1 SV=1 - [HRG_HUMAN]	68.67	4.38	2	2	2	525	59.5409
P22894	Neutrophil collagenase OS=Homo sapiens GN=MMP8 PE=1 SV=1 - [MMP8_HUMAN]	66.27	3.64	2	2	2	467	53.3785
P02760	Protein AMBP OS=Homo sapiens GN=AMBP PE=1 SV=1 - [AMBP_HUMAN]	65.76	4.83	2	2	2	352	38.974
Q8NBJ7	Sulfatase-modifying factor 2 OS=Homo sapiens GN=SUMF2 PE=1 SV=2 - [SUMF2_HUMAN]	64.1	8.97	2	2	2	301	33.8218
P01700	Ig lambda chain V-I region HA OS=Homo sapiens PE=1 SV=1 - [LV102_HUMAN]	57.77	11.61	1	2	3	112	11.8889
Q9UI42	Carboxypeptidase A4 OS=Homo sapiens GN=CPA4 PE=1 SV=2 - [CBPA4_HUMAN]	55.71	5.46	2	2	2	421	47.3217
P01702	Ig lambda chain V-I region NIG-64 OS=Homo sapiens PE=1 SV=1 - [LV104_HUMAN]	55.68	14.41	2	2	3	111	11.4465
Q9UBC9	Small proline-rich protein 3 OS=Homo sapiens GN=SPRR3 PE=1 SV=2 - [SPRR3_HUMAN]	55.1	9.47	2	2	2	169	18.1422
P04211	Ig lambda chain V region 4A OS=Homo sapiens PE=4 SV=1 - [LV001_HUMAN]	53.32	13.68	2	2	2	117	12.372
A6NJ16	Putative V-set and immunoglobulin domain-containing-like protein IGHV4OR15-8 OS=Homo sapiens GN=IGHV4OR15-8 PE=5 SV=2 - [IV4F8_HUMAN]	52.87	10.57	2	2	2	123	13.576
P08185	Corticosteroid-binding globulin OS=Homo sapiens GN=SERPINA6 PE=1 SV=1 - [CBG_HUMAN]	44.37	9.38	2	2	2	405	45.1119

## Sheet: Sample #4
Accession	Description	Score	Coverage	# Unique Peptides	# Peptides	# PSMs	# AAs	MW [kDa]
P02768	Serum albumin OS=Homo sapiens GN=ALB PE=1 SV=2 - [ALBU_HUMAN]	2189.18	65.85	45	45	87	609	69.3215
P04264	Keratin, type II cytoskeletal 1 OS=Homo sapiens GN=KRT1 PE=1 SV=6 - [K2C1_HUMAN]	1988.23	54.81	30	34	46	644	65.999
P35908	Keratin, type II cytoskeletal 2 epidermal OS=Homo sapiens GN=KRT2 PE=1 SV=2 - [K22E_HUMAN]	1827.63	55.24	25	33	41	639	65.3932
P13645	Keratin, type I cytoskeletal 10 OS=Homo sapiens GN=KRT10 PE=1 SV=6 - [K1C10_HUMAN]	1534.94	46.23	24	28	35	584	58.7917
P25311	Zinc-alpha-2-glycoprotein OS=Homo sapiens GN=AZGP1 PE=1 SV=2 - [ZA2G_HUMAN]	1269.62	64.09	24	25	86	298	34.2371
P04745	Alpha-amylase 1 OS=Homo sapiens GN=AMY1A PE=1 SV=2 - [AMY1_HUMAN]	1157.99	53.82	24	24	37	511	57.7309
Q96DR5	BPI fold-containing family A member 2 OS=Homo sapiens GN=BPIFA2 PE=1 SV=2 - [BPIA2_HUMAN]	1066.37	54.22	21	21	95	249	26.9947
P01009	Alpha-1-antitrypsin OS=Homo sapiens GN=SERPINA1 PE=1 SV=3 - [A1AT_HUMAN]	995.34	52.63	24	24	33	418	46.707
P12429	Annexin A3 OS=Homo sapiens GN=ANXA3 PE=1 SV=3 - [ANXA3_HUMAN]	940.39	56.04	17	17	20	323	36.3527
P35527	Keratin, type I cytoskeletal 9 OS=Homo sapiens GN=KRT9 PE=1 SV=3 - [K1C9_HUMAN]	930.74	40.45	15	16	18	623	62.0268
P07858	Cathepsin B OS=Homo sapiens GN=CTSB PE=1 SV=3 - [CATB_HUMAN]	894.24	53.1	21	21	36	339	37.7968
Q6P5S2	UPF0762 protein C6orf58 OS=Homo sapiens GN=C6orf58 PE=1 SV=2 - [CF058_HUMAN]	879.47	64.24	23	23	69	330	37.9016
P01876	Ig alpha-1 chain C region OS=Homo sapiens GN=IGHA1 PE=1 SV=2 - [IGHA1_HUMAN]	864.8	50.71	8	20	44	353	37.6306
P29508	Serpin B3 OS=Homo sapiens GN=SERPINB3 PE=1 SV=2 - [SPB3_HUMAN]	813.6	41.54	7	16	21	390	44.5365
P48594	Serpin B4 OS=Homo sapiens GN=SERPINB4 PE=1 SV=2 - [SPB4_HUMAN]	784.8	31.79	5	14	18	390	44.8255
P23280	Carbonic anhydrase 6 OS=Homo sapiens GN=CA6 PE=1 SV=3 - [CAH6_HUMAN]	740.08	51.62	17	17	157	308	35.3446
P01877	Ig alpha-2 chain C region OS=Homo sapiens GN=IGHA2 PE=1 SV=3 - [IGHA2_HUMAN]	641.23	47.06	3	15	42	340	36.503
P00738	Haptoglobin OS=Homo sapiens GN=HP PE=1 SV=1 - [HPT_HUMAN]	636.42	37.19	16	16	18	406	45.1766
P01860	Ig gamma-3 chain C region OS=Homo sapiens GN=IGHG3 PE=1 SV=2 - [IGHG3_HUMAN]	589.89	45.89	5	12	20	377	41.2604
Q9UIV8	Serpin B13 OS=Homo sapiens GN=SERPINB13 PE=2 SV=2 - [SPB13_HUMAN]	580.92	40.41	14	14	18	391	44.2482
P01011	Alpha-1-antichymotrypsin OS=Homo sapiens GN=SERPINA3 PE=1 SV=2 - [AACT_HUMAN]	565.35	25.77	12	12	13	423	47.6205
P01857	Ig gamma-1 chain C region OS=Homo sapiens GN=IGHG1 PE=1 SV=1 - [IGHG1_HUMAN]	553.76	53.03	6	12	26	330	36.0832
P50897	Palmitoyl-protein thioesterase 1 OS=Homo sapiens GN=PPT1 PE=1 SV=1 - [PPT1_HUMAN]	535.41	40.2	12	12	18	306	34.1713
P30740	Leukocyte elastase inhibitor OS=Homo sapiens GN=SERPINB1 PE=1 SV=1 - [ILEU_HUMAN]	530.94	28.76	9	10	11	379	42.7147
P13647	Keratin, type II cytoskeletal 5 OS=Homo sapiens GN=KRT5 PE=1 SV=3 - [K2C5_HUMAN]	530.62	17.8	6	12	13	590	62.34
O00584	Ribonuclease T2 OS=Homo sapiens GN=RNASET2 PE=1 SV=2 - [RNT2_HUMAN]	529.45	34.38	11	11	19	256	29.4618
P61626	Lysozyme C OS=Homo sapiens GN=LYZ PE=1 SV=1 - [LYSC_HUMAN]	447.73	71.62	10	10	14	148	16.5263
Q9UI42	Carboxypeptidase A4 OS=Homo sapiens GN=CPA4 PE=1 SV=2 - [CBPA4_HUMAN]	446.34	27.08	10	10	12	421	47.3217
Q9UBR2	Cathepsin Z OS=Homo sapiens GN=CTSZ PE=1 SV=1 - [CATZ_HUMAN]	443.07	39.6	9	9	12	303	33.8462
Q96DA0	Zymogen granule protein 16 homolog B OS=Homo sapiens GN=ZG16B PE=1 SV=3 - [ZG16B_HUMAN]	432.51	38.46	8	8	35	208	22.7246
P01834	Ig kappa chain C region OS=Homo sapiens GN=IGKC PE=1 SV=1 - [IGKC_HUMAN]	426.28	82.08	7	7	21	106	11.6017
Q9UBX7	Kallikrein-11 OS=Homo sapiens GN=KLK11 PE=1 SV=2 - [KLK11_HUMAN]	426.12	42.2	9	9	16	282	31.0388
Q8N4F0	BPI fold-containing family B member 2 OS=Homo sapiens GN=BPIFB2 PE=1 SV=2 - [BPIB2_HUMAN]	423.3	22.49	8	8	13	458	49.1417
P12273	Prolactin-inducible protein OS=Homo sapiens GN=PIP PE=1 SV=1 - [PIP_HUMAN]	422.71	65.07	8	8	9	146	16.5618
P01859	Ig gamma-2 chain C region OS=Homo sapiens GN=IGHG2 PE=1 SV=2 - [IGHG2_HUMAN]	407.88	38.65	4	10	18	326	35.8778
Q92820	Gamma-glutamyl hydrolase OS=Homo sapiens GN=GGH PE=1 SV=2 - [GGH_HUMAN]	399.31	30.82	10	10	14	318	35.9412
P01871	Ig mu chain C region OS=Homo sapiens GN=IGHM PE=1 SV=3 - [IGHM_HUMAN]	393.89	25.22	10	10	13	452	49.2755
P01861	Ig gamma-4 chain C region OS=Homo sapiens GN=IGHG4 PE=1 SV=1 - [IGHG4_HUMAN]	362.5	35.17	2	8	12	327	35.9179
P07339	Cathepsin D OS=Homo sapiens GN=CTSD PE=1 SV=1 - [CATD_HUMAN]	346.24	23.06	7	7	8	412	44.5236
P01033	Metalloproteinase inhibitor 1 OS=Homo sapiens GN=TIMP1 PE=1 SV=1 - [TIMP1_HUMAN]	340.82	52.17	7	7	9	207	23.1555
P01036	Cystatin-S OS=Homo sapiens GN=CST4 PE=1 SV=3 - [CYTS_HUMAN]	337.58	60.28	4	8	9	141	16.204
P09228	Cystatin-SA OS=Homo sapiens GN=CST2 PE=1 SV=1 - [CYTT_HUMAN]	304.77	53.19	4	7	8	141	16.4342
Q08380	Galectin-3-binding protein OS=Homo sapiens GN=LGALS3BP PE=1 SV=1 - [LG3BP_HUMAN]	280.85	12.31	6	6	8	585	65.2893
Q8NBJ7	Sulfatase-modifying factor 2 OS=Homo sapiens GN=SUMF2 PE=1 SV=2 - [SUMF2_HUMAN]	278.26	23.26	6	6	6	301	33.8218
Q9H0W9	Ester hydrolase C11orf54 OS=Homo sapiens GN=C11orf54 PE=1 SV=1 - [CK054_HUMAN]	270.42	25.4	7	7	8	315	35.0946
P0CG05	Ig lambda-2 chain C regions OS=Homo sapiens GN=IGLC2 PE=1 SV=1 - [LAC2_HUMAN]	270.29	62.26	3	5	16	106	11.2865
P55058	Phospholipid transfer protein OS=Homo sapiens GN=PLTP PE=1 SV=1 - [PLTP_HUMAN]	266.04	12.17	5	5	5	493	54.7045
P02533	Keratin, type I cytoskeletal 14 OS=Homo sapiens GN=KRT14 PE=1 SV=4 - [K1C14_HUMAN]	264.66	9.11	2	6	7	472	51.5294
P01037	Cystatin-SN OS=Homo sapiens GN=CST1 PE=1 SV=3 - [CYTN_HUMAN]	261.79	56.74	3	6	8	141	16.3773
P07602	Proactivator polypeptide OS=Homo sapiens GN=PSAP PE=1 SV=2 - [SAP_HUMAN]	260.48	14.12	7	7	9	524	58.0739
P01766	Ig heavy chain V-III region BRO OS=Homo sapiens PE=1 SV=1 - [HV305_HUMAN]	255.74	40	1	5	6	120	13.2184
P02750	Leucine-rich alpha-2-glycoprotein OS=Homo sapiens GN=LRG1 PE=1 SV=2 - [A2GL_HUMAN]	254.91	22.48	6	7	8	347	38.1541
P10909	Clusterin OS=Homo sapiens GN=CLU PE=1 SV=1 - [CLUS_HUMAN]	232.83	16.48	6	6	6	449	52.461
P80188	Neutrophil gelatinase-associated lipocalin OS=Homo sapiens GN=LCN2 PE=1 SV=2 - [NGAL_HUMAN]	232.65	28.28	4	4	4	198	22.5737
B9A064	Immunoglobulin lambda-like polypeptide 5 OS=Homo sapiens GN=IGLL5 PE=2 SV=2 - [IGLL5_HUMAN]	229.39	26.64	2	4	10	214	23.0486
P01765	Ig heavy chain V-III region TIL OS=Homo sapiens PE=1 SV=1 - [HV304_HUMAN]	220.4	32.17	2	4	6	115	12.3481
Q8WVQ1	Soluble calcium-activated nucleotidase 1 OS=Homo sapiens GN=CANT1 PE=1 SV=1 - [CANT1_HUMAN]	210.6	20.2	6	6	6	401	44.8117
P02749	Beta-2-glycoprotein 1 OS=Homo sapiens GN=APOH PE=1 SV=3 - [APOH_HUMAN]	206.7	15.94	4	4	4	345	38.2727
P02790	Hemopexin OS=Homo sapiens GN=HPX PE=1 SV=2 - [HEMO_HUMAN]	203.13	14.29	6	6	6	462	51.6433
Q9UKR3	Kallikrein-13 OS=Homo sapiens GN=KLK13 PE=1 SV=1 - [KLK13_HUMAN]	199.24	15.16	4	4	4	277	30.5505
P01768	Ig heavy chain V-III region CAM OS=Homo sapiens PE=1 SV=1 - [HV307_HUMAN]	195.64	29.51	3	6	6	122	13.6592
Q9UL52	Transmembrane protease serine 11E OS=Homo sapiens GN=TMPRSS11E PE=1 SV=2 - [TM11E_HUMAN]	188	15.13	4	4	4	423	47.6651
Q16651	Prostasin OS=Homo sapiens GN=PRSS8 PE=1 SV=1 - [PRSS8_HUMAN]	187	11.66	3	3	5	343	36.4083
P01591	Immunoglobulin J chain OS=Homo sapiens GN=IGJ PE=1 SV=4 - [IGJ_HUMAN]	182.82	27.67	4	4	5	159	18.087
Q6P4A8	Phospholipase B-like 1 OS=Homo sapiens GN=PLBD1 PE=1 SV=2 - [PLBL1_HUMAN]	175.5	10.31	5	5	5	553	63.2142
P10619	Lysosomal protective protein OS=Homo sapiens GN=CTSA PE=1 SV=2 - [PPGB_HUMAN]	172.68	13.75	4	4	4	480	54.4311
P54108	Cysteine-rich secretory protein 3 OS=Homo sapiens GN=CRISP3 PE=1 SV=1 - [CRIS3_HUMAN]	163.9	17.96	5	5	6	245	27.612
P28325	Cystatin-D OS=Homo sapiens GN=CST5 PE=1 SV=1 - [CYTD_HUMAN]	163.67	26.06	3	3	4	142	16.0699
P37837	Transaldolase OS=Homo sapiens GN=TALDO1 PE=1 SV=2 - [TALDO_HUMAN]	156.37	11.28	4	4	4	337	37.5165
Q15084	Protein disulfide-isomerase A6 OS=Homo sapiens GN=PDIA6 PE=1 SV=1 - [PDIA6_HUMAN]	156.04	8.86	3	3	3	440	48.0913
P06870	Kallikrein-1 OS=Homo sapiens GN=KLK1 PE=1 SV=2 - [KLK1_HUMAN]	155.98	15.65	4	4	5	262	28.8709
P07711	Cathepsin L1 OS=Homo sapiens GN=CTSL1 PE=1 SV=2 - [CATL1_HUMAN]	148.69	12.01	4	4	4	333	37.5397
P02774	Vitamin D-binding protein OS=Homo sapiens GN=GC PE=1 SV=1 - [VTDB_HUMAN]	145.4	12.24	5	5	5	474	52.929
P01598	Ig kappa chain V-I region EU OS=Homo sapiens PE=1 SV=1 - [KV106_HUMAN]	145.2	26.85	2	2	3	108	11.7808
P05120	Plasminogen activator inhibitor 2 OS=Homo sapiens GN=SERPINB2 PE=1 SV=2 - [PAI2_HUMAN]	140.25	12.05	4	4	4	415	46.5661
P80748	Ig lambda chain V-III region LOI OS=Homo sapiens PE=1 SV=1 - [LV302_HUMAN]	138.04	21.62	2	2	2	111	11.9278
O00560	Syntenin-1 OS=Homo sapiens GN=SDCBP PE=1 SV=1 - [SDCB1_HUMAN]	137.63	10.07	2	2	3	298	32.4239
P08758	Annexin A5 OS=Homo sapiens GN=ANXA5 PE=1 SV=2 - [ANXA5_HUMAN]	137.33	9.69	2	2	2	320	35.9144
Q13510	Acid ceramidase OS=Homo sapiens GN=ASAH1 PE=1 SV=5 - [ASAH1_HUMAN]	133.9	7.34	3	3	3	395	44.6308
P50452	Serpin B8 OS=Homo sapiens GN=SERPINB8 PE=1 SV=2 - [SPB8_HUMAN]	120.02	6.95	2	3	3	374	42.7392
P24158	Myeloblastin OS=Homo sapiens GN=PRTN3 PE=1 SV=3 - [PRTN3_HUMAN]	119.42	11.33	3	3	4	256	27.7893
P81605	Dermcidin OS=Homo sapiens GN=DCD PE=1 SV=2 - [DCD_HUMAN]	118.61	20	2	2	2	110	11.2768
P02763	Alpha-1-acid glycoprotein 1 OS=Homo sapiens GN=ORM1 PE=1 SV=1 - [A1AG1_HUMAN]	116.09	18.91	3	3	3	201	23.4968
P01700	Ig lambda chain V-I region HA OS=Homo sapiens PE=1 SV=1 - [LV102_HUMAN]	115.34	23.21	3	3	3	112	11.8889
P01608	Ig kappa chain V-I region Roy OS=Homo sapiens PE=1 SV=1 - [KV116_HUMAN]	109.59	24.07	2	2	2	108	11.7748
P31025	Lipocalin-1 OS=Homo sapiens GN=LCN1 PE=1 SV=1 - [LCN1_HUMAN]	105.45	12.5	2	2	2	176	19.2378
P05109	Protein S100-A8 OS=Homo sapiens GN=S100A8 PE=1 SV=1 - [S10A8_HUMAN]	96.34	29.03	3	3	3	93	10.8276
P01825	Ig heavy chain V-II region NEWM OS=Homo sapiens PE=1 SV=1 - [HV207_HUMAN]	94.35	18.8	2	2	2	117	12.7823
P07686	Beta-hexosaminidase subunit beta OS=Homo sapiens GN=HEXB PE=1 SV=3 - [HEXB_HUMAN]	87.06	7.19	4	4	4	556	63.0712
Q6ZMR5	Transmembrane protease serine 11A OS=Homo sapiens GN=TMPRSS11A PE=1 SV=1 - [TM11A_HUMAN]	81.76	4.51	2	2	2	421	47.5385
O75635	Serpin B7 OS=Homo sapiens GN=SERPINB7 PE=2 SV=1 - [SPB7_HUMAN]	73.02	5.53	2	2	2	380	42.8775
P20061	Transcobalamin-1 OS=Homo sapiens GN=TCN1 PE=1 SV=2 - [TCO1_HUMAN]	70.76	5.08	2	2	2	433	48.176
P48595	Serpin B10 OS=Homo sapiens GN=SERPINB10 PE=1 SV=1 - [SPB10_HUMAN]	70.59	5.04	2	2	2	397	45.3739
Q9NZP8	Complement C1r subcomponent-like protein OS=Homo sapiens GN=C1RL PE=1 SV=2 - [C1RL_HUMAN]	69.33	4.93	2	2	2	487	53.4643
P02765	Alpha-2-HS-glycoprotein OS=Homo sapiens GN=AHSG PE=1 SV=1 - [FETUA_HUMAN]	68.56	4.63	2	2	2	367	39.2997
Q10588	ADP-ribosyl cyclase 2 OS=Homo sapiens GN=BST1 PE=1 SV=2 - [BST1_HUMAN]	68.27	6.92	2	2	2	318	35.7011
P28799	Granulins OS=Homo sapiens GN=GRN PE=1 SV=2 - [GRN_HUMAN]	66.25	4.38	2	2	3	593	63.4998
Q96P63	Serpin B12 OS=Homo sapiens GN=SERPINB12 PE=1 SV=1 - [SPB12_HUMAN]	64.88	4.94	2	2	2	405	46.2471
P01814	Ig heavy chain V-II region OU OS=Homo sapiens PE=1 SV=1 - [HV201_HUMAN]	59.37	9.52	2	2	2	126	14.2668
Q9UBC9	Small proline-rich protein 3 OS=Homo sapiens GN=SPRR3 PE=1 SV=2 - [SPRR3_HUMAN]	56.5	9.47	2	2	2	169	18.1422
Q92876	Kallikrein-6 OS=Homo sapiens GN=KLK6 PE=1 SV=1 - [KLK6_HUMAN]	52.89	13.11	2	2	2	244	26.8384

## Sheet: Sample #5
Accession	Description	Score	Coverage	# Unique Peptides	# Peptides	# PSMs	# AAs	MW [kDa]
P02768	Serum albumin OS=Homo sapiens GN=ALB PE=1 SV=2 - [ALBU_HUMAN]	1949.35	65.68	44	44	81	609	69.3215
P04264	Keratin, type II cytoskeletal 1 OS=Homo sapiens GN=KRT1 PE=1 SV=6 - [K2C1_HUMAN]	1491.46	41.61	22	25	30	644	65.999
P04745	Alpha-amylase 1 OS=Homo sapiens GN=AMY1A PE=1 SV=2 - [AMY1_HUMAN]	1263.36	58.12	26	26	45	511	57.7309
P29508	Serpin B3 OS=Homo sapiens GN=SERPINB3 PE=1 SV=2 - [SPB3_HUMAN]	1237.53	56.67	25	25	44	390	44.5365
P01009	Alpha-1-antitrypsin OS=Homo sapiens GN=SERPINA1 PE=1 SV=3 - [A1AT_HUMAN]	1236.37	54.78	28	28	50	418	46.707
P25311	Zinc-alpha-2-glycoprotein OS=Homo sapiens GN=AZGP1 PE=1 SV=2 - [ZA2G_HUMAN]	1196.4	64.09	25	25	78	298	34.2371
P35908	Keratin, type II cytoskeletal 2 epidermal OS=Homo sapiens GN=KRT2 PE=1 SV=2 - [K22E_HUMAN]	1102.03	36.93	14	18	18	639	65.3932
P13645	Keratin, type I cytoskeletal 10 OS=Homo sapiens GN=KRT10 PE=1 SV=6 - [K1C10_HUMAN]	1033.72	35.45	15	18	21	584	58.7917
Q9UIV8	Serpin B13 OS=Homo sapiens GN=SERPINB13 PE=2 SV=2 - [SPB13_HUMAN]	977.17	51.41	20	20	32	391	44.2482
P01011	Alpha-1-antichymotrypsin OS=Homo sapiens GN=SERPINA3 PE=1 SV=2 - [AACT_HUMAN]	968.77	37.12	20	20	31	423	47.6205
P01876	Ig alpha-1 chain C region OS=Homo sapiens GN=IGHA1 PE=1 SV=2 - [IGHA1_HUMAN]	895.56	48.44	8	19	90	353	37.6306
P07858	Cathepsin B OS=Homo sapiens GN=CTSB PE=1 SV=3 - [CATB_HUMAN]	881.98	53.1	20	20	31	339	37.7968
Q6P5S2	UPF0762 protein C6orf58 OS=Homo sapiens GN=C6orf58 PE=1 SV=2 - [CF058_HUMAN]	874.48	63.03	23	23	78	330	37.9016
Q96DR5	BPI fold-containing family A member 2 OS=Homo sapiens GN=BPIFA2 PE=1 SV=2 - [BPIA2_HUMAN]	799.67	53.41	18	18	37	249	26.9947
P00738	Haptoglobin OS=Homo sapiens GN=HP PE=1 SV=1 - [HPT_HUMAN]	765.92	34.24	17	17	24	406	45.1766
O00584	Ribonuclease T2 OS=Homo sapiens GN=RNASET2 PE=1 SV=2 - [RNT2_HUMAN]	752.07	54.69	15	15	25	256	29.4618
P01877	Ig alpha-2 chain C region OS=Homo sapiens GN=IGHA2 PE=1 SV=3 - [IGHA2_HUMAN]	729.79	47.06	4	15	82	340	36.503
P30740	Leukocyte elastase inhibitor OS=Homo sapiens GN=SERPINB1 PE=1 SV=1 - [ILEU_HUMAN]	726.52	40.11	15	15	17	379	42.7147
P35527	Keratin, type I cytoskeletal 9 OS=Homo sapiens GN=KRT9 PE=1 SV=3 - [K1C9_HUMAN]	702.26	28.25	12	13	13	623	62.0268
P37837	Transaldolase OS=Homo sapiens GN=TALDO1 PE=1 SV=2 - [TALDO_HUMAN]	693.86	38.87	15	15	24	337	37.5165
P23280	Carbonic anhydrase 6 OS=Homo sapiens GN=CA6 PE=1 SV=3 - [CAH6_HUMAN]	672.89	51.3	16	16	118	308	35.3446
P01857	Ig gamma-1 chain C region OS=Homo sapiens GN=IGHG1 PE=1 SV=1 - [IGHG1_HUMAN]	604.69	60	6	14	29	330	36.0832
P01860	Ig gamma-3 chain C region OS=Homo sapiens GN=IGHG3 PE=1 SV=2 - [IGHG3_HUMAN]	581.64	50.93	6	14	22	377	41.2604
P08779	Keratin, type I cytoskeletal 16 OS=Homo sapiens GN=KRT16 PE=1 SV=4 - [K1C16_HUMAN]	543.87	25.79	5	11	12	473	51.2362
Q6P4A8	Phospholipase B-like 1 OS=Homo sapiens GN=PLBD1 PE=1 SV=2 - [PLBL1_HUMAN]	541.64	24.23	13	13	14	553	63.2142
P01871	Ig mu chain C region OS=Homo sapiens GN=IGHM PE=1 SV=3 - [IGHM_HUMAN]	538.08	33.63	13	13	18	452	49.2755
Q9UBX7	Kallikrein-11 OS=Homo sapiens GN=KLK11 PE=1 SV=2 - [KLK11_HUMAN]	528.12	46.45	12	12	22	282	31.0388
Q8N4F0	BPI fold-containing family B member 2 OS=Homo sapiens GN=BPIFB2 PE=1 SV=2 - [BPIB2_HUMAN]	506.15	39.3	12	12	20	458	49.1417
P35237	Serpin B6 OS=Homo sapiens GN=SERPINB6 PE=1 SV=3 - [SPB6_HUMAN]	480.39	33.51	10	10	11	376	42.5941
P02533	Keratin, type I cytoskeletal 14 OS=Homo sapiens GN=KRT14 PE=1 SV=4 - [K1C14_HUMAN]	470.44	19.7	3	9	10	472	51.5294
P50897	Palmitoyl-protein thioesterase 1 OS=Homo sapiens GN=PPT1 PE=1 SV=1 - [PPT1_HUMAN]	464.11	40.2	10	10	16	306	34.1713
Q08380	Galectin-3-binding protein OS=Homo sapiens GN=LGALS3BP PE=1 SV=1 - [LG3BP_HUMAN]	458.7	17.09	9	9	12	585	65.2893
P07711	Cathepsin L1 OS=Homo sapiens GN=CTSL1 PE=1 SV=2 - [CATL1_HUMAN]	447.18	30.93	10	10	19	333	37.5397
P61626	Lysozyme C OS=Homo sapiens GN=LYZ PE=1 SV=1 - [LYSC_HUMAN]	443.91	71.62	10	10	15	148	16.5263
P07339	Cathepsin D OS=Homo sapiens GN=CTSD PE=1 SV=1 - [CATD_HUMAN]	434.12	25.73	9	9	14	412	44.5236
Q92820	Gamma-glutamyl hydrolase OS=Homo sapiens GN=GGH PE=1 SV=2 - [GGH_HUMAN]	398.51	30.82	10	10	15	318	35.9412
P01859	Ig gamma-2 chain C region OS=Homo sapiens GN=IGHG2 PE=1 SV=2 - [IGHG2_HUMAN]	398	37.73	3	10	17	326	35.8778
P01861	Ig gamma-4 chain C region OS=Homo sapiens GN=IGHG4 PE=1 SV=1 - [IGHG4_HUMAN]	392.74	35.17	2	9	10	327	35.9179
P12273	Prolactin-inducible protein OS=Homo sapiens GN=PIP PE=1 SV=1 - [PIP_HUMAN]	391.62	47.95	7	7	8	146	16.5618
Q9UBR2	Cathepsin Z OS=Homo sapiens GN=CTSZ PE=1 SV=1 - [CATZ_HUMAN]	390.52	39.6	9	9	10	303	33.8462
P04075	Fructose-bisphosphate aldolase A OS=Homo sapiens GN=ALDOA PE=1 SV=2 - [ALDOA_HUMAN]	387.14	27.2	9	10	12	364	39.3953
P01834	Ig kappa chain C region OS=Homo sapiens GN=IGKC PE=1 SV=1 - [IGKC_HUMAN]	352.38	82.08	6	6	18	106	11.6017
P04259	Keratin, type II cytoskeletal 6B OS=Homo sapiens GN=KRT6B PE=1 SV=5 - [K2C6B_HUMAN]	346.84	11.88	3	6	6	564	60.0303
P0CG05	Ig lambda-2 chain C regions OS=Homo sapiens GN=IGLC2 PE=1 SV=1 - [LAC2_HUMAN]	332.63	62.26	3	5	12	106	11.2865
P55058	Phospholipid transfer protein OS=Homo sapiens GN=PLTP PE=1 SV=1 - [PLTP_HUMAN]	332.18	14.4	7	7	8	493	54.7045
Q8WVQ1	Soluble calcium-activated nucleotidase 1 OS=Homo sapiens GN=CANT1 PE=1 SV=1 - [CANT1_HUMAN]	331.63	21.95	8	8	9	401	44.8117
Q96DA0	Zymogen granule protein 16 homolog B OS=Homo sapiens GN=ZG16B PE=1 SV=3 - [ZG16B_HUMAN]	294.11	33.65	6	6	12	208	22.7246
P01036	Cystatin-S OS=Homo sapiens GN=CST4 PE=1 SV=3 - [CYTS_HUMAN]	271.78	47.52	5	7	8	141	16.204
Q13510	Acid ceramidase OS=Homo sapiens GN=ASAH1 PE=1 SV=5 - [ASAH1_HUMAN]	270.23	12.66	6	6	6	395	44.6308
P01766	Ig heavy chain V-III region BRO OS=Homo sapiens PE=1 SV=1 - [HV305_HUMAN]	265.31	40	1	5	8	120	13.2184
P01781	Ig heavy chain V-III region GAL OS=Homo sapiens PE=1 SV=1 - [HV320_HUMAN]	259.09	32.76	3	5	8	116	12.7222
P09228	Cystatin-SA OS=Homo sapiens GN=CST2 PE=1 SV=1 - [CYTT_HUMAN]	255.29	40.43	4	6	6	141	16.4342
P10909	Clusterin OS=Homo sapiens GN=CLU PE=1 SV=1 - [CLUS_HUMAN]	250.39	16.48	6	6	6	449	52.461
Q9H0W9	Ester hydrolase C11orf54 OS=Homo sapiens GN=C11orf54 PE=1 SV=1 - [CK054_HUMAN]	246.71	25.4	7	7	8	315	35.0946
B9A064	Immunoglobulin lambda-like polypeptide 5 OS=Homo sapiens GN=IGLL5 PE=2 SV=2 - [IGLL5_HUMAN]	244.49	26.64	2	4	9	214	23.0486
P23141	Liver carboxylesterase 1 OS=Homo sapiens GN=CES1 PE=1 SV=2 - [EST1_HUMAN]	243.71	8.64	4	4	4	567	62.4812
P06870	Kallikrein-1 OS=Homo sapiens GN=KLK1 PE=1 SV=2 - [KLK1_HUMAN]	233.69	19.85	6	6	7	262	28.8709
P01765	Ig heavy chain V-III region TIL OS=Homo sapiens PE=1 SV=1 - [HV304_HUMAN]	232.35	32.17	2	4	7	115	12.3481
Q12805	EGF-containing fibulin-like extracellular matrix protein 1 OS=Homo sapiens GN=EFEMP1 PE=1 SV=2 - [FBLN3_HUMAN]	228.14	10.34	4	4	4	493	54.6042
P28799	Granulins OS=Homo sapiens GN=GRN PE=1 SV=2 - [GRN_HUMAN]	226.61	10.46	5	5	7	593	63.4998
P12429	Annexin A3 OS=Homo sapiens GN=ANXA3 PE=1 SV=3 - [ANXA3_HUMAN]	220.27	13	4	4	4	323	36.3527
P08185	Corticosteroid-binding globulin OS=Homo sapiens GN=SERPINA6 PE=1 SV=1 - [CBG_HUMAN]	219.97	12.84	5	5	5	405	45.1119
P07686	Beta-hexosaminidase subunit beta OS=Homo sapiens GN=HEXB PE=1 SV=3 - [HEXB_HUMAN]	219.48	16.01	8	8	8	556	63.0712
P13647	Keratin, type II cytoskeletal 5 OS=Homo sapiens GN=KRT5 PE=1 SV=3 - [K2C5_HUMAN]	212.25	7.97	3	4	4	590	62.34
P01768	Ig heavy chain V-III region CAM OS=Homo sapiens PE=1 SV=1 - [HV307_HUMAN]	204.44	29.51	3	6	9	122	13.6592
P02790	Hemopexin OS=Homo sapiens GN=HPX PE=1 SV=2 - [HEMO_HUMAN]	203.12	17.32	6	6	6	462	51.6433
P01591	Immunoglobulin J chain OS=Homo sapiens GN=IGJ PE=1 SV=4 - [IGJ_HUMAN]	202.23	36.48	5	5	6	159	18.087
P80188	Neutrophil gelatinase-associated lipocalin OS=Homo sapiens GN=LCN2 PE=1 SV=2 - [NGAL_HUMAN]	201.73	28.28	4	4	4	198	22.5737
P02749	Beta-2-glycoprotein 1 OS=Homo sapiens GN=APOH PE=1 SV=3 - [APOH_HUMAN]	189.16	11.88	4	4	4	345	38.2727
P48595	Serpin B10 OS=Homo sapiens GN=SERPINB10 PE=1 SV=1 - [SPB10_HUMAN]	185.51	14.11	4	5	6	397	45.3739
Q8NBJ7	Sulfatase-modifying factor 2 OS=Homo sapiens GN=SUMF2 PE=1 SV=2 - [SUMF2_HUMAN]	181.86	17.28	4	4	4	301	33.8218
P01033	Metalloproteinase inhibitor 1 OS=Homo sapiens GN=TIMP1 PE=1 SV=1 - [TIMP1_HUMAN]	170.51	27.05	4	4	4	207	23.1555
P08697	Alpha-2-antiplasmin OS=Homo sapiens GN=SERPINF2 PE=1 SV=3 - [A2AP_HUMAN]	167.65	6.92	3	3	3	491	54.5311
Q16651	Prostasin OS=Homo sapiens GN=PRSS8 PE=1 SV=1 - [PRSS8_HUMAN]	159.18	11.66	3	3	5	343	36.4083
Q9UKR3	Kallikrein-13 OS=Homo sapiens GN=KLK13 PE=1 SV=1 - [KLK13_HUMAN]	157.88	11.55	3	3	3	277	30.5505
P28325	Cystatin-D OS=Homo sapiens GN=CST5 PE=1 SV=1 - [CYTD_HUMAN]	154.31	21.13	2	2	3	142	16.0699
O43866	CD5 antigen-like OS=Homo sapiens GN=CD5L PE=1 SV=1 - [CD5L_HUMAN]	151.93	14.99	4	4	4	347	38.0629
O43278	Kunitz-type protease inhibitor 1 OS=Homo sapiens GN=SPINT1 PE=1 SV=2 - [SPIT1_HUMAN]	146.54	8.13	4	4	4	529	58.3602
P54108	Cysteine-rich secretory protein 3 OS=Homo sapiens GN=CRISP3 PE=1 SV=1 - [CRIS3_HUMAN]	134.51	15.51	4	4	5	245	27.612
P80748	Ig lambda chain V-III region LOI OS=Homo sapiens PE=1 SV=1 - [LV302_HUMAN]	133.19	21.62	2	2	2	111	11.9278
Q01459	Di-N-acetylchitobiase OS=Homo sapiens GN=CTBS PE=1 SV=1 - [DIAC_HUMAN]	125.29	7.53	2	2	2	385	43.7316
P01743	Ig heavy chain V-I region HG3 OS=Homo sapiens PE=4 SV=1 - [HV102_HUMAN]	114.99	22.22	2	2	4	117	12.9373
Q9UI42	Carboxypeptidase A4 OS=Homo sapiens GN=CPA4 PE=1 SV=2 - [CBPA4_HUMAN]	109.54	5.46	2	2	2	421	47.3217
P06331	Ig heavy chain V-II region ARH-77 OS=Homo sapiens PE=4 SV=1 - [HV209_HUMAN]	106.87	21.23	3	3	3	146	16.2181
P09972	Fructose-bisphosphate aldolase C OS=Homo sapiens GN=ALDOC PE=1 SV=2 - [ALDOC_HUMAN]	105.42	12.64	2	3	4	364	39.4312
Q9NZP8	Complement C1r subcomponent-like protein OS=Homo sapiens GN=C1RL PE=1 SV=2 - [C1RL_HUMAN]	103.04	6.16	3	3	3	487	53.4643
P08571	Monocyte differentiation antigen CD14 OS=Homo sapiens GN=CD14 PE=1 SV=2 - [CD14_HUMAN]	96.68	10.13	3	3	3	375	40.0507
P07602	Proactivator polypeptide OS=Homo sapiens GN=PSAP PE=1 SV=2 - [SAP_HUMAN]	94.99	4.58	2	2	2	524	58.0739
P02765	Alpha-2-HS-glycoprotein OS=Homo sapiens GN=AHSG PE=1 SV=1 - [FETUA_HUMAN]	94.94	4.63	2	2	2	367	39.2997
Q9HAT2	Sialate O-acetylesterase OS=Homo sapiens GN=SIAE PE=1 SV=1 - [SIAE_HUMAN]	94.5	6.69	3	3	3	523	58.2771
P42785	Lysosomal Pro-X carboxypeptidase OS=Homo sapiens GN=PRCP PE=1 SV=1 - [PCP_HUMAN]	94.49	6.25	3	3	3	496	55.7639
P02763	Alpha-1-acid glycoprotein 1 OS=Homo sapiens GN=ORM1 PE=1 SV=1 - [A1AG1_HUMAN]	92.84	11.44	2	2	2	201	23.4968
P31025	Lipocalin-1 OS=Homo sapiens GN=LCN1 PE=1 SV=1 - [LCN1_HUMAN]	92.81	12.5	2	2	2	176	19.2378
P05543	Thyroxine-binding globulin OS=Homo sapiens GN=SERPINA7 PE=1 SV=2 - [THBG_HUMAN]	91.75	4.58	2	2	2	415	46.2946
P02750	Leucine-rich alpha-2-glycoprotein OS=Homo sapiens GN=LRG1 PE=1 SV=2 - [A2GL_HUMAN]	90.72	10.37	3	3	3	347	38.1541
P04208	Ig lambda chain V-I region WAH OS=Homo sapiens PE=1 SV=1 - [LV106_HUMAN]	86.8	16.51	2	2	2	109	11.7177
Q9UBX1	Cathepsin F OS=Homo sapiens GN=CTSF PE=1 SV=1 - [CATF_HUMAN]	85.68	4.55	2	2	2	484	53.3318
Q10588	ADP-ribosyl cyclase 2 OS=Homo sapiens GN=BST1 PE=1 SV=2 - [BST1_HUMAN]	82.35	6.92	2	2	2	318	35.7011
P24158	Myeloblastin OS=Homo sapiens GN=PRTN3 PE=1 SV=3 - [PRTN3_HUMAN]	76.77	8.2	2	2	2	256	27.7893
Q99574	Neuroserpin OS=Homo sapiens GN=SERPINI1 PE=1 SV=1 - [NEUS_HUMAN]	74.25	5.61	2	2	2	410	46.3971
Q9UBC9	Small proline-rich protein 3 OS=Homo sapiens GN=SPRR3 PE=1 SV=2 - [SPRR3_HUMAN]	71.43	9.47	2	2	2	169	18.1422
P40199	Carcinoembryonic antigen-related cell adhesion molecule 6 OS=Homo sapiens GN=CEACAM6 PE=1 SV=3 - [CEAM6_HUMAN]	67.41	9.88	2	2	2	344	37.1717
P01814	Ig heavy chain V-II region OU OS=Homo sapiens PE=1 SV=1 - [HV201_HUMAN]	63.41	9.52	2	2	2	126	14.2668
A6NJ16	Putative V-set and immunoglobulin domain-containing-like protein IGHV4OR15-8 OS=Homo sapiens GN=IGHV4OR15-8 PE=5 SV=2 - [IV4F8_HUMAN]	56.01	10.57	2	2	2	123	13.576
P15328	Folate receptor alpha OS=Homo sapiens GN=FOLR1 PE=1 SV=3 - [FOLR1_HUMAN]	46.25	8.17	2	2	2	257	29.7992

## Sheet: Sample #6
Accession	Description	Score	Coverage	# Unique Peptides	# Peptides	# PSMs	# AAs	MW [kDa]
P02768	Serum albumin OS=Homo sapiens GN=ALB PE=1 SV=2 - [ALBU_HUMAN]	2336.83	75.37	50	50	93	609	69.3215
P01833	Polymeric immunoglobulin receptor OS=Homo sapiens GN=PIGR PE=1 SV=4 - [PIGR_HUMAN]	1915.16	44.76	38	38	61	764	83.2317
P29508	Serpin B3 OS=Homo sapiens GN=SERPINB3 PE=1 SV=2 - [SPB3_HUMAN]	1734.23	78.21	35	35	76	390	44.5365
P04745	Alpha-amylase 1 OS=Homo sapiens GN=AMY1A PE=1 SV=2 - [AMY1_HUMAN]	1686.34	70.25	35	35	117	511	57.7309
P01009	Alpha-1-antitrypsin OS=Homo sapiens GN=SERPINA1 PE=1 SV=3 - [A1AT_HUMAN]	1670.3	65.31	34	34	96	418	46.707
Q9HC84	Mucin-5B OS=Homo sapiens GN=MUC5B PE=1 SV=3 - [MUC5B_HUMAN]	1650.31	7.95	35	35	37	5762	595.96
P30740	Leukocyte elastase inhibitor OS=Homo sapiens GN=SERPINB1 PE=1 SV=1 - [ILEU_HUMAN]	1446.66	55.41	23	24	52	379	42.7147
P22079	Lactoperoxidase OS=Homo sapiens GN=LPO PE=1 SV=2 - [PERL_HUMAN]	1412.38	42.13	33	33	60	712	80.2369
P01011	Alpha-1-antichymotrypsin OS=Homo sapiens GN=SERPINA3 PE=1 SV=2 - [AACT_HUMAN]	1278.03	41.37	25	25	47	423	47.6205
Q9UIV8	Serpin B13 OS=Homo sapiens GN=SERPINB13 PE=2 SV=2 - [SPB13_HUMAN]	1133.15	67.26	23	23	39	391	44.2482
P01876	Ig alpha-1 chain C region OS=Homo sapiens GN=IGHA1 PE=1 SV=2 - [IGHA1_HUMAN]	1117.92	76.77	10	23	142	353	37.6306
P13796	Plastin-2 OS=Homo sapiens GN=LCP1 PE=1 SV=6 - [PLSL_HUMAN]	1111.94	45.14	22	22	26	627	70.2439
P02787	Serotransferrin OS=Homo sapiens GN=TF PE=1 SV=3 - [TRFE_HUMAN]	1102.42	34.24	19	20	32	698	77.0136
P13645	Keratin, type I cytoskeletal 10 OS=Homo sapiens GN=KRT10 PE=1 SV=6 - [K1C10_HUMAN]	1071.06	38.18	16	20	26	584	58.7917
P25311	Zinc-alpha-2-glycoprotein OS=Homo sapiens GN=AZGP1 PE=1 SV=2 - [ZA2G_HUMAN]	1015.88	60.4	20	20	41	298	34.2371
Q9Y6R7	IgGFc-binding protein OS=Homo sapiens GN=FCGBP PE=1 SV=3 - [FCGBP_HUMAN]	985	11.1	21	21	24	5405	571.639
P35908	Keratin, type II cytoskeletal 2 epidermal OS=Homo sapiens GN=KRT2 PE=1 SV=2 - [K22E_HUMAN]	962.58	35.37	17	19	19	639	65.3932
P07339	Cathepsin D OS=Homo sapiens GN=CTSD PE=1 SV=1 - [CATD_HUMAN]	904.17	47.82	17	17	35	412	44.5236
P02788	Lactotransferrin OS=Homo sapiens GN=LTF PE=1 SV=6 - [TRFL_HUMAN]	879.79	38.17	20	21	23	710	78.1319
P01877	Ig alpha-2 chain C region OS=Homo sapiens GN=IGHA2 PE=1 SV=3 - [IGHA2_HUMAN]	873.52	56.47	4	17	105	340	36.503
A8K2U0	Alpha-2-macroglobulin-like protein 1 OS=Homo sapiens GN=A2ML1 PE=1 SV=3 - [A2ML1_HUMAN]	856.96	15.75	21	21	22	1454	161.004
P04264	Keratin, type II cytoskeletal 1 OS=Homo sapiens GN=KRT1 PE=1 SV=6 - [K2C1_HUMAN]	829.05	27.48	16	18	19	644	65.999
P01857	Ig gamma-1 chain C region OS=Homo sapiens GN=IGHG1 PE=1 SV=1 - [IGHG1_HUMAN]	766.36	67.88	6	17	90	330	36.0832
P01860	Ig gamma-3 chain C region OS=Homo sapiens GN=IGHG3 PE=1 SV=2 - [IGHG3_HUMAN]	718.01	56.23	6	16	50	377	41.2604
P00738	Haptoglobin OS=Homo sapiens GN=HP PE=1 SV=1 - [HPT_HUMAN]	667.2	33.25	16	16	21	406	45.1766
P01859	Ig gamma-2 chain C region OS=Homo sapiens GN=IGHG2 PE=1 SV=2 - [IGHG2_HUMAN]	614.36	49.39	6	14	54	326	35.8778
Q8N4F0	BPI fold-containing family B member 2 OS=Homo sapiens GN=BPIFB2 PE=1 SV=2 - [BPIB2_HUMAN]	613.1	27.29	12	12	27	458	49.1417
P01871	Ig mu chain C region OS=Homo sapiens GN=IGHM PE=1 SV=3 - [IGHM_HUMAN]	605.16	35.4	14	14	22	452	49.2755
Q6P5S2	UPF0762 protein C6orf58 OS=Homo sapiens GN=C6orf58 PE=1 SV=2 - [CF058_HUMAN]	581.6	57.58	16	16	29	330	37.9016
P10619	Lysosomal protective protein OS=Homo sapiens GN=CTSA PE=1 SV=2 - [PPGB_HUMAN]	578.35	25.42	11	11	13	480	54.4311
P55058	Phospholipid transfer protein OS=Homo sapiens GN=PLTP PE=1 SV=1 - [PLTP_HUMAN]	575.85	20.08	12	12	20	493	54.7045
P19021	Peptidyl-glycine alpha-amidating monooxygenase OS=Homo sapiens GN=PAM PE=1 SV=2 - [AMD_HUMAN]	571.22	15.72	14	14	17	973	108.263
Q6P4A8	Phospholipase B-like 1 OS=Homo sapiens GN=PLBD1 PE=1 SV=2 - [PLBL1_HUMAN]	557.8	25.86	13	13	14	553	63.2142
P01861	Ig gamma-4 chain C region OS=Homo sapiens GN=IGHG4 PE=1 SV=1 - [IGHG4_HUMAN]	523.6	50.15	4	12	26	327	35.9179
P02533	Keratin, type I cytoskeletal 14 OS=Homo sapiens GN=KRT14 PE=1 SV=4 - [K1C14_HUMAN]	521.06	20.55	6	10	13	472	51.5294
Q9UGM3	Deleted in malignant brain tumors 1 protein OS=Homo sapiens GN=DMBT1 PE=1 SV=2 - [DMBT1_HUMAN]	504.19	18.52	13	13	14	2413	260.569
Q08380	Galectin-3-binding protein OS=Homo sapiens GN=LGALS3BP PE=1 SV=1 - [LG3BP_HUMAN]	494.31	19.15	10	10	12	585	65.2893
P28799	Granulins OS=Homo sapiens GN=GRN PE=1 SV=2 - [GRN_HUMAN]	490.7	20.24	10	10	14	593	63.4998
P05543	Thyroxine-binding globulin OS=Homo sapiens GN=SERPINA7 PE=1 SV=2 - [THBG_HUMAN]	485.06	28.67	9	9	9	415	46.2946
P50452	Serpin B8 OS=Homo sapiens GN=SERPINB8 PE=1 SV=2 - [SPB8_HUMAN]	439.7	32.09	9	11	11	374	42.7392
P08571	Monocyte differentiation antigen CD14 OS=Homo sapiens GN=CD14 PE=1 SV=2 - [CD14_HUMAN]	432.16	40.27	10	10	13	375	40.0507
P61626	Lysozyme C OS=Homo sapiens GN=LYZ PE=1 SV=1 - [LYSC_HUMAN]	428.78	71.62	10	10	13	148	16.5263
P37837	Transaldolase OS=Homo sapiens GN=TALDO1 PE=1 SV=2 - [TALDO_HUMAN]	410.93	23.15	9	9	11	337	37.5165
P02790	Hemopexin OS=Homo sapiens GN=HPX PE=1 SV=2 - [HEMO_HUMAN]	406.83	22.29	11	11	11	462	51.6433
P20061	Transcobalamin-1 OS=Homo sapiens GN=TCN1 PE=1 SV=2 - [TCO1_HUMAN]	394.87	26.33	9	9	10	433	48.176
P12273	Prolactin-inducible protein OS=Homo sapiens GN=PIP PE=1 SV=1 - [PIP_HUMAN]	394.56	65.07	8	8	8	146	16.5618
P01834	Ig kappa chain C region OS=Homo sapiens GN=IGKC PE=1 SV=1 - [IGKC_HUMAN]	387.84	82.08	6	6	16	106	11.6017
P01768	Ig heavy chain V-III region CAM OS=Homo sapiens PE=1 SV=1 - [HV307_HUMAN]	350.97	45.9	3	8	14	122	13.6592
P48595	Serpin B10 OS=Homo sapiens GN=SERPINB10 PE=1 SV=1 - [SPB10_HUMAN]	346.68	28.97	7	8	8	397	45.3739
P35527	Keratin, type I cytoskeletal 9 OS=Homo sapiens GN=KRT9 PE=1 SV=3 - [K1C9_HUMAN]	341.95	10.91	4	5	5	623	62.0268
P01764	Ig heavy chain V-III region VH26 OS=Homo sapiens PE=1 SV=1 - [HV303_HUMAN]	333.55	44.44	2	6	9	117	12.5742
Q96DA0	Zymogen granule protein 16 homolog B OS=Homo sapiens GN=ZG16B PE=1 SV=3 - [ZG16B_HUMAN]	329.18	33.65	7	7	8	208	22.7246
Q9UBX7	Kallikrein-11 OS=Homo sapiens GN=KLK11 PE=1 SV=2 - [KLK11_HUMAN]	327.78	40.07	9	9	12	282	31.0388
Q8WVQ1	Soluble calcium-activated nucleotidase 1 OS=Homo sapiens GN=CANT1 PE=1 SV=1 - [CANT1_HUMAN]	326.52	28.43	9	9	9	401	44.8117
P42785	Lysosomal Pro-X carboxypeptidase OS=Homo sapiens GN=PRCP PE=1 SV=1 - [PCP_HUMAN]	313.97	17.54	8	8	9	496	55.7639
P07858	Cathepsin B OS=Homo sapiens GN=CTSB PE=1 SV=3 - [CATB_HUMAN]	305.17	30.68	7	7	8	339	37.7968
P14780	Matrix metalloproteinase-9 OS=Homo sapiens GN=MMP9 PE=1 SV=3 - [MMP9_HUMAN]	301.22	8.91	7	7	8	707	78.4084
P01036	Cystatin-S OS=Homo sapiens GN=CST4 PE=1 SV=3 - [CYTS_HUMAN]	299.99	46.81	3	6	6	141	16.204
O43505	N-acetyllactosaminide beta-1,3-N-acetylglucosaminyltransferase OS=Homo sapiens GN=B3GNT1 PE=1 SV=1 - [B3GN1_HUMAN]	297.1	15.66	8	8	9	415	47.0889
P0CG05	Ig lambda-2 chain C regions OS=Homo sapiens GN=IGLC2 PE=1 SV=1 - [LAC2_HUMAN]	287.12	62.26	5	5	12	106	11.2865
P09228	Cystatin-SA OS=Homo sapiens GN=CST2 PE=1 SV=1 - [CYTT_HUMAN]	284.23	40.43	4	6	6	141	16.4342
Q99574	Neuroserpin OS=Homo sapiens GN=SERPINI1 PE=1 SV=1 - [NEUS_HUMAN]	263.82	12.93	5	5	5	410	46.3971
P01781	Ig heavy chain V-III region GAL OS=Homo sapiens PE=1 SV=1 - [HV320_HUMAN]	257.31	32.76	3	5	9	116	12.7222
Q9HB40	Retinoid-inducible serine carboxypeptidase OS=Homo sapiens GN=SCPEP1 PE=1 SV=1 - [RISC_HUMAN]	251.38	11.95	6	6	7	452	50.7977
Q13510	Acid ceramidase OS=Homo sapiens GN=ASAH1 PE=1 SV=5 - [ASAH1_HUMAN]	246.17	16.2	5	5	5	395	44.6308
P01766	Ig heavy chain V-III region BRO OS=Homo sapiens PE=1 SV=1 - [HV305_HUMAN]	236.06	40	1	5	13	120	13.2184
P23280	Carbonic anhydrase 6 OS=Homo sapiens GN=CA6 PE=1 SV=3 - [CAH6_HUMAN]	226.08	20.45	5	5	9	308	35.3446
P02751	Fibronectin OS=Homo sapiens GN=FN1 PE=1 SV=4 - [FINC_HUMAN]	220.27	4.61	8	8	10	2386	262.46
P36222	Chitinase-3-like protein 1 OS=Homo sapiens GN=CHI3L1 PE=1 SV=2 - [CH3L1_HUMAN]	220.23	16.45	5	5	5	383	42.5984
P01767	Ig heavy chain V-III region BUT OS=Homo sapiens PE=1 SV=1 - [HV306_HUMAN]	218.82	41.74	2	5	17	115	12.3712
P08697	Alpha-2-antiplasmin OS=Homo sapiens GN=SERPINF2 PE=1 SV=3 - [A2AP_HUMAN]	215.05	14.26	5	5	6	491	54.5311
O00584	Ribonuclease T2 OS=Homo sapiens GN=RNASET2 PE=1 SV=2 - [RNT2_HUMAN]	208.1	13.67	4	4	4	256	29.4618
P01019	Angiotensinogen OS=Homo sapiens GN=AGT PE=1 SV=1 - [ANGT_HUMAN]	201.86	9.69	3	3	4	485	53.1205
P01591	Immunoglobulin J chain OS=Homo sapiens GN=IGJ PE=1 SV=4 - [IGJ_HUMAN]	185.04	36.48	5	5	5	159	18.087
P05154	Plasma serine protease inhibitor OS=Homo sapiens GN=SERPINA5 PE=1 SV=3 - [IPSP_HUMAN]	184.98	8.87	3	3	4	406	45.6457
Q9UBX1	Cathepsin F OS=Homo sapiens GN=CTSF PE=1 SV=1 - [CATF_HUMAN]	183.89	11.16	6	6	6	484	53.3318
P16870	Carboxypeptidase E OS=Homo sapiens GN=CPE PE=1 SV=1 - [CBPE_HUMAN]	183.69	13.45	4	4	4	476	53.1171
Q96DR5	BPI fold-containing family A member 2 OS=Homo sapiens GN=BPIFA2 PE=1 SV=2 - [BPIA2_HUMAN]	180.98	23.29	5	5	6	249	26.9947
P80188	Neutrophil gelatinase-associated lipocalin OS=Homo sapiens GN=LCN2 PE=1 SV=2 - [NGAL_HUMAN]	174.48	28.28	4	4	4	198	22.5737
P35237	Serpin B6 OS=Homo sapiens GN=SERPINB6 PE=1 SV=3 - [SPB6_HUMAN]	174.29	15.69	4	4	4	376	42.5941
P01037	Cystatin-SN OS=Homo sapiens GN=CST1 PE=1 SV=3 - [CYTN_HUMAN]	173.21	31.91	2	4	5	141	16.3773
P02749	Beta-2-glycoprotein 1 OS=Homo sapiens GN=APOH PE=1 SV=3 - [APOH_HUMAN]	170.56	21.74	5	5	5	345	38.2727
P14384	Carboxypeptidase M OS=Homo sapiens GN=CPM PE=1 SV=2 - [CBPM_HUMAN]	141.21	9.48	4	4	4	443	50.4815
P07686	Beta-hexosaminidase subunit beta OS=Homo sapiens GN=HEXB PE=1 SV=3 - [HEXB_HUMAN]	136.58	9.17	5	5	5	556	63.0712
P27487	Dipeptidyl peptidase 4 OS=Homo sapiens GN=DPP4 PE=1 SV=2 - [DPP4_HUMAN]	133.84	4.7	3	3	3	766	88.2225
P28325	Cystatin-D OS=Homo sapiens GN=CST5 PE=1 SV=1 - [CYTD_HUMAN]	133.75	21.13	2	2	2	142	16.0699
P01743	Ig heavy chain V-I region HG3 OS=Homo sapiens PE=4 SV=1 - [HV102_HUMAN]	131.22	22.22	2	2	3	117	12.9373
O75635	Serpin B7 OS=Homo sapiens GN=SERPINB7 PE=2 SV=1 - [SPB7_HUMAN]	129.91	9.21	3	3	3	380	42.8775
P01008	Antithrombin-III OS=Homo sapiens GN=SERPINC1 PE=1 SV=1 - [ANT3_HUMAN]	127.23	9.48	3	3	3	464	52.5689
O14773	Tripeptidyl-peptidase 1 OS=Homo sapiens GN=TPP1 PE=1 SV=2 - [TPP1_HUMAN]	127.21	8.17	3	3	3	563	61.2096
P01023	Alpha-2-macroglobulin OS=Homo sapiens GN=A2M PE=1 SV=3 - [A2MG_HUMAN]	125.55	1.83	2	2	2	1474	163.188
P24158	Myeloblastin OS=Homo sapiens GN=PRTN3 PE=1 SV=3 - [PRTN3_HUMAN]	124.57	21.48	4	4	4	256	27.7893
P80748	Ig lambda chain V-III region LOI OS=Homo sapiens PE=1 SV=1 - [LV302_HUMAN]	124	21.62	2	2	2	111	11.9278
P12830	Cadherin-1 OS=Homo sapiens GN=CDH1 PE=1 SV=3 - [CADH1_HUMAN]	121.69	3.85	2	2	2	882	97.3959
Q92820	Gamma-glutamyl hydrolase OS=Homo sapiens GN=GGH PE=1 SV=2 - [GGH_HUMAN]	118.84	11.01	3	3	4	318	35.9412
P06331	Ig heavy chain V-II region ARH-77 OS=Homo sapiens PE=4 SV=1 - [HV209_HUMAN]	113.92	17.12	2	2	3	146	16.2181
P01762	Ig heavy chain V-III region TRO OS=Homo sapiens PE=1 SV=1 - [HV301_HUMAN]	110.01	22.95	2	4	5	122	13.4635
A6NJ16	Putative V-set and immunoglobulin domain-containing-like protein IGHV4OR15-8 OS=Homo sapiens GN=IGHV4OR15-8 PE=5 SV=2 - [IV4F8_HUMAN]	108.78	17.89	4	4	4	123	13.576
Q96P44	Collagen alpha-1(XXI) chain OS=Homo sapiens GN=COL21A1 PE=2 SV=1 - [COLA1_HUMAN]	108.34	2.3	2	2	2	957	99.3067
P15309	Prostatic acid phosphatase OS=Homo sapiens GN=ACPP PE=1 SV=3 - [PPAP_HUMAN]	107.48	9.84	3	3	3	386	44.5375
P54108	Cysteine-rich secretory protein 3 OS=Homo sapiens GN=CRISP3 PE=1 SV=1 - [CRIS3_HUMAN]	107.08	15.51	4	4	4	245	27.612
P06870	Kallikrein-1 OS=Homo sapiens GN=KLK1 PE=1 SV=2 - [KLK1_HUMAN]	104.12	12.6	3	3	3	262	28.8709
Q06830	Peroxiredoxin-1 OS=Homo sapiens GN=PRDX1 PE=1 SV=1 - [PRDX1_HUMAN]	100.15	15.08	3	3	3	199	22.0963
P02765	Alpha-2-HS-glycoprotein OS=Homo sapiens GN=AHSG PE=1 SV=1 - [FETUA_HUMAN]	94.25	4.63	2	2	2	367	39.2997
P01814	Ig heavy chain V-II region OU OS=Homo sapiens PE=1 SV=1 - [HV201_HUMAN]	82.86	9.52	2	2	2	126	14.2668
P04075	Fructose-bisphosphate aldolase A OS=Homo sapiens GN=ALDOA PE=1 SV=2 - [ALDOA_HUMAN]	82.04	9.34	2	2	2	364	39.3953
P06865	Beta-hexosaminidase subunit alpha OS=Homo sapiens GN=HEXA PE=1 SV=2 - [HEXA_HUMAN]	79.24	4.16	2	2	2	529	60.6643
P02774	Vitamin D-binding protein OS=Homo sapiens GN=GC PE=1 SV=1 - [VTDB_HUMAN]	59.3	4.01	2	2	2	474	52.929
Q15782	Chitinase-3-like protein 2 OS=Homo sapiens GN=CHI3L2 PE=1 SV=1 - [CH3L2_HUMAN]	53.32	7.95	2	2	2	390	43.473
P23083	Ig heavy chain V-I region V35 OS=Homo sapiens PE=1 SV=1 - [HV103_HUMAN]	38.84	19.66	2	2	4	117	13.0004
