# Supplementary material for: KLK3/PSA and cathepsin D activate VEGF-C and VEGF-D
Source: eLife journal article supplement (doi:10.7554/elife.44478), 2019-05-17
Supplement: supp [file Figure 1-Source data 1.xlsx]

## Sheet: BaF3-hVEGFR3 assay
KLK3+FL-VEGF-C-FL			KLK3+FL-VEGF-C-FL	SD	VEGF-C-FL			VEGF-C-FL	SD	dCdN-VEGF-C			dCdN-VEGF-C	SD	KLK3			KLK3	SD	Mock			Mock	SD
0.162	0.18	0.169	0.170333	0.00907377	0.102	0.098	0.087	0.0956667	0.00776745	0.538	0.5	0.53	0.522667	0.0200333	0.071	0.068	0.067	0.0686667	0.00208167	0.065	0.065	0.066	0.0653333	0.00057735
0.112	0.121	0.115	0.116	0.00458258	0.071	0.073	0.073	0.0723333	0.0011547	0.549	0.465	0.506	0.506667	0.042004	0.07	0.07	0.069	0.0696667	0.00057735	0.069	0.073	0.067	0.0696667	0.00305505
0.097	0.093	0.096	0.0953333	0.00208167	0.068	0.071	0.07	0.0696667	0.00152753	0.448	0.432	0.436	0.438667	0.00832666	0.07	0.07	0.069	0.0696667	0.00057735	0.068	0.069	0.068	0.0683333	0.00057735
0.081	0.087	0.081	0.083	0.0034641	0.068	0.071	0.07	0.0696667	0.00152753	0.428	0.43	0.446	0.434667	0.00986577	0.07	0.07	0.07	0.07	0	0.07	0.073	0.073	0.072	0.00173205
0.076	0.081	0.077	0.078	0.00264575	0.065	0.071	0.068	0.068	0.003	0.445	0.427	0.447	0.439667	0.0110151	0.068	0.07	0.068	0.0686667	0.0011547	0.069	0.068	0.069	0.0686667	0.00057735
0.07	0.07	0.07	0.07	0	0.064	0.068	0.067	0.0663333	0.00208167	0.472	0.471	0.444	0.462333	0.015885	0.069	0.07	0.067	0.0686667	0.00152753	0.07	0.068	0.068	0.0686667	0.0011547
0.067	0.067	0.067	0.067	0	0.063	0.066	0.066	0.065	0.00173205	0.466	0.427	0.462	0.451667	0.0214554	0.067	0.067	0.069	0.0676667	0.0011547	0.067	0.066	0.07	0.0676667	0.00208167
0.063	0.064	0.065	0.064	0.001	0.058	0.066	0.064	0.0626667	0.00416333	0.062	0.065	0.063	0.0633333	0.00152753	0.066	0.065	0.065	0.0653333	0.00057735	0.066	0.067	0.068	0.067	0.001
		Average
		KLK3+FL-VEGF-C-FL	VEGF-C-FL	dCdN-VEGF-C	KLK3	Mock
	100	0.170333	0.0956667	0.522667	0.0686667	0.0653333
	50	0.116	0.0723333	0.506667	0.0696667	0.0696667
	25	0.0953333	0.0696667	0.438667	0.0696667	0.0683333
	12.5	0.083	0.0696667	0.434667	0.07	0.072
	6.25	0.078	0.068	0.439667	0.0686667	0.0686667
	3.125	0.07	0.0663333	0.462333	0.0686667	0.0686667
	1.5625	0.067	0.065	0.451667	0.0676667	0.0676667
	0.78125	0.064	0.0626667	0.0633333	0.0653333	0.067
		Standard deviation
		KLK3+FL-VEGF-C-FL	VEGF-C-FL	dCdN-VEGF-C	KLK3	Mock
		0.00907377	0.00776745	0.0200333	0.00208167	0.00057735
		0.00458258	0.0011547	0.042004	0.00057735	0.00305505
		0.00208167	0.00152753	0.00832666	0.00057735	0.00057735
		0.0034641	0.00152753	0.00986577	0	0.00173205
		0.00264575	0.003	0.0110151	0.0011547	0.00057735
		0	0.00208167	0.015885	0.00152753	0.0011547
		0	0.00173205	0.0214554	0.0011547	0.00208167
		0.001	0.00416333	0.00152753	0.00057735	0.001
						μ
		Average
	Concentration(ug/ml)	KLK3+FL-VEGF-C	VEGF-C	KLK3	Mock
	3	0.170333	0.0956667	0.0686667	0.0653333
	1.5	0.116	0.0723333	0.0696667	0.0696667
	0.75	0.0953333	0.0696667	0.0696667	0.0683333
	0.375	0.083	0.0696667	0.07	0.072
	0.1875	0.078	0.068	0.0686667	0.0686667
	0.09375	0.07	0.0663333	0.0686667	0.0686667
	0.046875	0.067	0.065	0.0676667	0.0676667
	0	0.064	0.0626667	0.0653333	0.067
		Standard deviation
		KLK3+FL-VEGF-C-FL	VEGF-C-FL	KLK3	Mock
		0.00907377	0.00776745	0.00208167	0.00057735
		0.00458258	0.0011547	0.00057735	0.00305505
		0.00208167	0.00152753	0.00057735	0.00057735
		0.0034641	0.00152753	0	0.00173205
		0.00264575	0.003	0.0011547	0.00057735
		0	0.00208167	0.00152753	0.0011547
		0	0.00173205	0.0011547	0.00208167
		0.001	0.00416333	0.00057735	0.001

## Sheet: BaF3-mVEGFR2 assay
		KLK3+FL-VEGF-C			FL-VEGF-C			dNdC-VEGF-C
	1	2	3	4	5	6	7	8	9	10	11	12
A	0.077	0.382	0.336	0.314	0.107	0.106	0.102	0.389	0.403	0.393	0.077	0.076
B	0.074	0.124	0.123	0.129	0.075	0.08	0.079	0.406	0.377	0.403	0.076	0.076
C	0.071	0.101	0.097	0.1	0.071	0.076	0.076	0.352	0.352	0.384	0.079	0.077
D	0.067	0.078	0.081	0.081	0.062	0.07	0.068	0.341	0.358	0.35	0.071	0.072
E	0.069	0.075	0.074	0.074	0.072	0.076	0.078	0.376	0.373	0.362	0.078	0.075
F	0.07	0.069	0.07	0.072	0.069	0.072	0.072	0.345	0.34	0.344	0.073	0.073
G	0.069	0.068	0.07	0.069	0.071	0.069	0.07	0.34	0.329	0.332	0.072	0.07
H	0.069	0.165	0.072	0.075	0.069	0.075	0.07	0.068	0.071	0.068	0.069	0.07
			KLK3			Mock
	1	2	3	4	5	6	7	8	9	10	11	12
A	0.078	0.077	0.078	0.078	0.08	0.078	0.075	0.076	0.075	0.074	0.077	0.08
B	0.073	0.071	0.07	0.071	0.07	0.066	0.07	0.068	0.07	0.067	0.071	0.078
C	0.074	0.072	0.07	0.071	0.072	0.073	0.073	0.073	0.075	0.076	0.078	0.08
D	0.074	0.073	0.071	0.07	0.078	0.069	0.071	0.075	0.077	0.075	0.074	0.075
E	0.076	0.071	0.073	0.072	0.073	0.071	0.071	0.071	0.069	0.074	0.076	0.076
F	0.076	0.071	0.072	0.07	0.07	0.069	0.071	0.07	0.071	0.071	0.07	0.069
G	0.074	0.071	0.07	0.073	0.071	0.07	0.071	0.072	0.072	0.069	0.074	0.071
H	0.071	0.069	0.068	0.067	0.069	0.066	0.066	0.066	0.071	0.068	0.066	0.067
KLK3+FL-VEGF-C-FL			KLK3+FL-VEGF-C-FL	SD	VEGF-C-FL			VEGF-C-FL	SD	dCdN-VEGF-C			dCdN-VEGF-C	SD	KLK3			KLK3	SD	Mock			Mock	SD
0.382	0.336	0.314	0.344	0.0346987	0.107	0.106	0.102	0.105	0.00264575	0.389	0.403	0.393	0.395	0.0072111	0.078	0.078	0.08	0.0786667	0.0011547	0.078	0.075	0.076	0.0763333	0.00152753
0.124	0.123	0.129	0.125333	0.00321455	0.075	0.08	0.079	0.078	0.00264575	0.406	0.377	0.403	0.395333	0.0159478	0.07	0.071	0.07	0.0703333	0.00057735	0.066	0.07	0.068	0.068	0.002
0.101	0.097	0.1	0.0993333	0.00208167	0.071	0.076	0.076	0.0743333	0.00288675	0.352	0.352	0.384	0.362667	0.0184752	0.07	0.071	0.072	0.071	0.001	0.073	0.073	0.073	0.073	0
0.078	0.081	0.081	0.08	0.00173205	0.062	0.07	0.068	0.0666667	0.00416333	0.341	0.358	0.35	0.349667	0.0085049	0.071	0.07	0.078	0.073	0.0043589	0.069	0.071	0.075	0.0716667	0.00305505
0.075	0.074	0.074	0.0743333	0.00057735	0.072	0.076	0.078	0.0753333	0.00305505	0.376	0.373	0.362	0.370333	0.00737111	0.073	0.072	0.073	0.0726667	0.00057735	0.071	0.071	0.071	0.071	0
0.069	0.07	0.072	0.0703333	0.00152753	0.069	0.072	0.072	0.071	0.00173205	0.345	0.34	0.344	0.343	0.00264575	0.072	0.07	0.07	0.0706667	0.0011547	0.069	0.071	0.07	0.07	0.001
0.068	0.07	0.069	0.069	0.001	0.071	0.069	0.07	0.07	0.001	0.34	0.329	0.332	0.333667	0.00568624	0.07	0.073	0.071	0.0713333	0.00152753	0.07	0.071	0.072	0.071	0.001
0.165	0.072	0.075	0.104	0.0528488	0.069	0.075	0.07	0.0713333	0.00321455	0.068	0.071	0.068	0.069	0.00173205	0.068	0.067	0.069	0.068	0.001	0.066	0.066	0.066	0.066	0
		Average
		KLK3+FL-VEGF-C-FL	VEGF-C-FL	dCdN-VEGF-C	KLK3	Mock
	100	0.344	0.105	0.395	0.0786667	0.0763333
	50	0.125333	0.078	0.395333	0.0703333	0.068
	25	0.0993333	0.0743333	0.362667	0.071	0.073
	12.5	0.08	0.0666667	0.349667	0.073	0.0716667
	6.25	0.0743333	0.0753333	0.370333	0.0726667	0.071
	3.125	0.0703333	0.071	0.343	0.0706667	0.07
	1.5625	0.069	0.07	0.333667	0.0713333	0.071
	0.78125	0.104	0.0713333	0.069	0.068	0.066
		Standard deviation
		KLK3+FL-VEGF-C-FL	VEGF-C-FL	dCdN-VEGF-C	KLK3	Mock
		0.0346987	0.00264575	0.0072111	0.0011547	0.00152753
		0.00321455	0.00264575	0.0159478	0.00057735	0.002
		0.00208167	0.00288675	0.0184752	0.001	0
		0.00173205	0.00416333	0.0085049	0.0043589	0.00305505
		0.00057735	0.00305505	0.00737111	0.00057735	0
		0.00152753	0.00173205	0.00264575	0.0011547	0.001
		0.001	0.001	0.00568624	0.00152753	0.001
		0.0528488	0.00321455	0.00173205	0.001	0
			Average
		Concentration(ug/ml)	KLK3+FL-VEGF-C	VEGF-C	KLK3	Mock
		3	0.344	0.105	0.0786667	0.0763333
		1.5	0.125333	0.078	0.0703333	0.068
		0.75	0.0993333	0.0743333	0.071	0.073
		0.375	0.08	0.0666667	0.073	0.0716667
		0.1875	0.0743333	0.0753333	0.0726667	0.071
		0.09375	0.0703333	0.071	0.0706667	0.07
		0.046875	0.069	0.07	0.0713333	0.071
		0	0.104	0.0713333	0.068	0.066
		Standard deviation
		KLK3+FL-VEGF-C-FL	VEGF-C-FL	KLK3	Mock
		0.0046987	0.00264575	0.0011547	0.00152753
		0.00321455	0.00264575	0.00057735	0.002
		0.00208167	0.00288675	0.001	0
		0.00173205	0.00416333	0.0043589	0.00305505
		0.00057735	0.00305505	0.00057735	0
		0.00152753	0.00173205	0.0011547	0.001
		0.001	0.001	0.00152753	0.001
		0.0528488	0.00321455	0.001	0
