# Supplementary material for: KLK3/PSA and cathepsin D activate VEGF-C and VEGF-D
Source: eLife journal article supplement (doi:10.7554/elife.44478), 2019-05-17
Supplement: supp [file Figure 7-Source data 1.xlsx]

## Sheet: Sheet1
												VEGF-C-FL-(on/Ctrl)
			VEGF-C-FL (1h)			VEGF-C-FL-(1h/Ctrl)
		3/1h			3/ctrl/1 h			3/o.n			3/ctrl/o.n
		1	2	3	4	5	6	7	8	9	10	11	12
	A	0.2	0.205	0.189	0.181	0.178	0.182	0.201	0.19	0.187	0.192	0.207
	B		0.198	0.196	0.162	0.159	0.162	0.19	0.199	0.189	0.173	0.189	0.199
	C	0.221	0.203		0.135	0.136	0.153	0.193	0.2	0.201		0.172	0.182
	D	0.192	0.171	0.173	0.124	0.12	0.123	0.195		0.209	0.136	0.136	0.145
	E	0.154	0.14	0.152	0.103	0.103	0.104	0.156	0.149			0.121	0.127
	F	0.144	0.131	0.127	0.096	0.096	0.097	0.141	0.14	0.144	0.102	0.104	0.111
	G	0.126	0.127		0.09	0.089	0.094	0.128	0.123	0.126	0.1	0.096	0.106
	H	0.098	0.084	0.085	0.086	0.086	0.085	0.084	0.083	0.084	0.089	0.087	0.092
								Average
							% Sup	VEGF-C-FL+CTD (1h)	VEGF-C-FL(1h)	VEGF-C-FL+CTD (o/n)	VEGF-C-FL(o/n)
							100	0.198	0.180333	0.192667	0.1995
							50	0.197	0.161	0.192667	0.187
							25	0.212	0.141333	0.198	0.177
							12.5	0.178667	0.122333	0.202	0.139
							6.25	0.148667	0.103333	0.1525	0.124
							3.125	0.134	0.0963333	0.141667	0.105667
							1.5625	0.1265	0.091	0.125667	0.100667
							0	0.089	0.0856667	0.0836667	0.0893333
								SD
							% Sup	VEGF-C-FL (1h)	VEGF-C-FL-(1h/Ctrl)	VEGF-C-FL (on)	VEGF-C-FL-(on/Ctrl)
							100	0.00818535	0.00208167	0.00737111	0.0106066
							50	0.00141421	0.00173205	0.00550757	0.0131149
							25	0.0127279	0.010116	0.0043589	0.00707107
							12.5	0.0115902	0.00208167	0.00989949	0.00519615
							6.25	0.00757188	0.00057735	0.00494975	0.00424264
							3.125	0.00888819	0.00057735	0.00208167	0.00472582
							1.5625	0.000707107	0.00264575	0.00251661	0.00503322
							0	0.00781025	0.00057735	0.00057735	0.00251661
