# Supplementary material for: KLK3/PSA and cathepsin D activate VEGF-C and VEGF-D
Source: eLife journal article supplement (doi:10.7554/elife.44478), 2019-05-17
Supplement: supp [file Figure 7-Source data 2.xlsx]

## Sheet: Sheet1
		VEGF-C-FL				VEGF-C-FL+CTD(sample 1)				VEGF-C-FL+CTD(sample 2)
		1	2	3	4	5	6	7	8	9	10	11	12
	A		0.221	0.209	0.198	0.227	0.207	0.194	0.215	0.203	0.221	0.22
	B		0.174	0.165	0.171	0.172	0.177	0.169	0.171	0.204	0.214	0.2
	C		0.142	0.142	0.149	0.146	0.157	0.161	0.15	0.194	0.197	0.215
	D		0.134	0.13	0.13	0.134	0.131	0.146	0.137	0.174	0.195	0.194
	E		0.116	0.118	0.114	0.124	0.121	0.122	0.117	0.158	0.179	0.193
	F	0.111	0.102	0.108	0.109	0.113	0.114	0.113	0.114	0.154	0.166	0.178
	G	0.104	0.099	0.106	0.105	0.109	0.105	0.11	0.108	0.146	0.166	0.157	0.153
	H	0.09	0.092	0.099	0.102	0.104	0.104	0.106	0.105	0.099	0.102	0.098	0.105
								Average
							% Sup	VEGF-C-FL	VEGF-C-FL+CTD(sample 1)	VEGF-C-FL+CTD(sample 2)
							100	0.209333	0.21075	0.214667
							50	0.17	0.17225	0.206
							25	0.144333	0.1535	0.202
							12.5	0.131333	0.137	0.187667
							6.25	0.116	0.121	0.176667
							3.125	0.1075	0.1135	0.166
							1.5625	0.1035	0.108	0.1555
							0	0.09575	0.10475	0.101
								SD
							% Sup	VEGF-C-FL	VEGF-C-FL+CTD(sample 1)	VEGF-C-FL+CTD(sample 2)
							100	0.0115036	0.0138654	0.010116
							50	0.00458258	0.00340343	0.0072111
							25	0.00404145	0.00675771	0.0113578
							12.5	0.0023094	0.00648074	0.0118462
							6.25	0.002	0.00294392	0.0176163
							3.125	0.00387298	0.00057735	0.012
							1.5625	0.00310913	0.00216025	0.00834666
							0	0.00567891	0.000957427	0.00316228
