# Supplementary material for: KLK3/PSA and cathepsin D activate VEGF-C and VEGF-D
Source: eLife journal article supplement (doi:10.7554/elife.44478), 2019-05-17
Supplement: supp [file Figure 7-Source data 3.xlsx]

## Sheet: Sheet1
			dNdC-VEGF-D+CTD (4h)			dNdC-VEGF-D (4h)			dNdC-VEGF-D+CTD (o/n)			dNdC-VEGF-D (o/n)
		1	2	3	4	5	6	7	8	9	10	11	12
	A		0.142	0.13	0.173	0.193	0.18	0.135	0.141	0.136	0.18	0.174	0.189
	B	0.133	0.123	0.131	0.207	0.212	0.206	0.12	0.123	0.123	0.193	0.185	0.204
	C	0.109	0.1	0.107	0.174	0.188	0.191	0.096	0.1	0.099	0.182	0.165	0.176
	D	0.097	0.092	0.096	0.153	0.16	0.16	0.093	0.092	0.095	0.133	0.135	0.144
	E	0.092	0.087	0.09	0.125	0.137	0.13	0.088	0.093	0.095	0.114	0.119	0.124
	F	0.092	0.087	0.091	0.108	0.119	0.108	0.092	0.091	0.093	0.102	0.108	0.103
	G	0.092	0.087	0.088	0.097	0.1	0.096	0.087	0.088	0.089	0.098	0.092	0.105
	H	0.107	0.092	0.087	0.091	0.09	0.087	0.087	0.095	0.092	0.097	0.096	0.1
									Avg
							% Sup	dNdC-VEGF-D+CTD (4h)	dNdC-VEGF-D (4h)	dNdC-VEGF-D+CTD (o/n)	dNdC-VEGF-D (o/n)
							100	0.136	0.182	0.137333	0.181
							50	0.129	0.208333	0.122	0.194
							25	0.105333	0.184333	0.0983333	0.174333
							12.5	0.095	0.157667	0.0933333	0.137333
							6.25	0.0896667	0.130667	0.092	0.119
							3.125	0.09	0.111667	0.092	0.104333
							1.5625	0.089	0.0976667	0.088	0.0983333
							0	0.0953333	0.0893333	0.0913333	0.0976667
									STD
							% Sup	dNdC-VEGF-D+CTD (4h)	dNdC-VEGF-D (4h)	dNdC-VEGF-D+CTD (o/n)	dNdC-VEGF-D (o/n)
							100	0.00848528	0.0101489	0.00321455	0.00754983
							50	0.0052915	0.00321455	0.00173205	0.00953939
							25	0.00472582	0.00907377	0.00208167	0.00862168
							12.5	0.00264575	0.00404145	0.00152753	0.00585947
							6.25	0.00251661	0.00602771	0.00360555	0.005
							3.125	0.00264575	0.00635085	0.001	0.00321455
							1.5625	0.00264575	0.00208167	0.001	0.00650641
							0	0.0104083	0.00208167	0.00404145	0.00208167
