# Supplementary material for: KLK3/PSA and cathepsin D activate VEGF-C and VEGF-D
Source: eLife journal article supplement (doi:10.7554/elife.44478), 2019-05-17
Supplement: supp [file Figure 7-Source data 4.xlsx]

## Sheet: End point
User: USER
Path: C:\Program Files (x86)\BMG\Omega\User\Data\
Test ID: 7363
Test Name: MTT
Date: 17.12.2018
Time: 10:16:27
ID1: 2001_BaFmR2
ID2: matVEGFD_cathepsinD
ID3: 17_12_2018
Absorbance			Absorbance values are displayed as OD
	1. Raw Data (540)
	mature VEGF-D+CatD			mature VEGF-D			control
A	0.321	0.316	0.306	0.45	0.446	0.462	0.124	0.141	0.133
B	0.237	0.233	0.227	0.328	0.339	0.327	0.122	0.121	0.131
C	0.199	0.19	0.187	0.304	0.279	0.281	0.133	0.129	0.143
D	0.196	0.2	0.185	0.235	0.232	0.222	0.125	0.124	0.127
E	0.177	0.179	0.169	0.202	0.198	0.183	0.139	0.149	0.153
F	0.19	0.19	0.185	0.197	0.195	0.181	0.152	0.155	0.156
G	0.187	0.18	0.177	0.183	0.183	0.177	0.158	0.158	0.168
H	0.173	0.174	0.164	0.163	0.162	0.163	0.162	0.168	0.173
	2. Average over replicates based on Raw Data (540)
	mature VEGF-D+CatD			mature VEGF-D			control			10	11	12
A	0.314	0.314	0.314	0.453	0.453	0.453	0.132	0.132	0.132
B	0.232	0.232	0.232	0.331	0.331	0.331	0.125	0.125	0.125
C	0.192	0.192	0.192	0.288	0.288	0.288	0.135	0.135	0.135
D	0.194	0.194	0.194	0.23	0.23	0.23	0.126	0.126	0.126
E	0.175	0.175	0.175	0.194	0.194	0.194	0.147	0.147	0.147
F	0.188	0.188	0.188	0.191	0.191	0.191	0.155	0.155	0.155
G	0.181	0.181	0.181	0.181	0.181	0.181	0.161	0.161	0.161
H	0.17	0.17	0.17	0.163	0.163	0.163	0.168	0.168	0.168
						3.2ul	VEGFD control	media control
					0	0.17	0.163	0.168
					8.125	0.181	0.181	0.161
					16.25	0.188	0.191	0.155
					32.5	0.175	0.194	0.147
					65	0.194	0.23	0.126
					130	0.192	0.288	0.135
					260	0.232	0.331	0.125
					520	0.314	0.453	0.132
