# Supplementary material for: KLK3/PSA and cathepsin D activate VEGF-C and VEGF-D
Source: eLife journal article supplement (doi:10.7554/elife.44478), 2019-05-17
Supplement: supp [file Figure 7-Source data 5.xlsx]

## Sheet: Sheet1
			VEGF-D-FL(A5)+KLK3-o/n			VEGF-D-FL(A5)o/n			VEGF-D-FL(A5)+KLK3-3h			VEGF-D-FL(A5)-3h
			3/1h
			1	2	3	4	5	6	7	8	9	10	11	12
		A	0.213	0.2	0.197	0.16	0.146	0.168	0.156	0.143	0.133	0.117	0.126	0.142
		B		0.171	0.171	0.133	0.125	0.136	0.13	0.134	0.121	0.114	0.118	0.119
		C		0.138	0.145	0.124	0.119	0.13	0.124	0.125	0.12	0.11	0.12	0.121
		D		0.128	0.128	0.118	0.114	0.124	0.121	0.12	0.118	0.115	0.114	0.121
		E		0.12	0.123	0.118	0.12	0.116	0.114	0.117	0.115	0.122	0.118	0.125
		F	0.118	0.107	0.12	0.126	0.119	0.125	0.123	0.123	0.121	0.12	0.117	0.128
		G	0.133	0.118	0.121	0.115	0.125	0.124	0.117	0.122	0.121	0.121	0.12	0.137
		H	0.131	0.122	0.132	0.13	0.133	0.13	0.127	0.131	0.121	0.114	0.118	0.142
											Avg
									% Sup	VEGF-D-FL(A5)+KLK3-o/n	VEGF-D-FL(A5)o/n	VEGF-D-FL(A5)+KLK3-3hn)	VEGF-D-FL(A5)-3h
									100	0.203333	0.158	0.144	0.128333
									50	0.171	0.131333	0.128333	0.117
									25	0.1415	0.124333	0.123	0.117
									12.5	0.128	0.118667	0.119667	0.116667
									6.25	0.1215	0.118	0.115333	0.121667
									3.125	0.115	0.123333	0.122333	0.121667
									1.5625	0.124	0.121333	0.12	0.126
									0	0.128333	0.131	0.126333	0.124667
											SD
									% Sup	dNdC (1h)	dNdC-(Ctrl, 0 h)	dNdC (on)	dNdC(4h)
									100	0.0085049	0.0111355	0.0115326	0.0126623
									50	0	0.00568624	0.00665833	0.00264575
									25	0.00494975	0.00550757	0.00264575	0.00608276
									12.5	0	0.00503322	0.00152753	0.00378594
									6.25	0.00212132	0.002	0.00152753	0.00351188
									3.125	0.007	0.00378594	0.0011547	0.00568624
									1.5625	0.00793725	0.00550757	0.00264575	0.00953939
									0	0.00550757	0.00173205	0.00503322	0.0151438
