# Supplementary material for: KLK3/PSA and cathepsin D activate VEGF-C and VEGF-D
Source: eLife journal article supplement (doi:10.7554/elife.44478), 2019-05-17
Supplement: supp [file Figure 7-Source data 6.xlsx]

## Sheet: End point
User: USER
Path: C:\Program Files (x86)\BMG\Omega\User\Data\
Test ID: 7362
Test Name: MTT
Date: 17.12.2018
Time: 10:14:18
ID1: 2001_BaFmR2
ID2: matVEGFC_cathepsinD
ID3: 17_12_2018
Absorbance			Absorbance values are displayed as OD
	1. Raw Data (540)
	mature VEGF-C+CatD (0.5ul)			mature VEGF-C+CatD (1 ul)			mature VEGF-C			control
A	0.619	0.594	0.603	0.552	0.543	0.59	0.611	0.649	0.579	0.124	0.127	0.127
B	0.651	0.555	0.548	0.582	0.587	0.578	0.629	0.63	0.61	0.121	0.119	0.136
C	0.676	0.612	0.624	0.622	0.59	0.595	0.668	0.72	0.683	0.129	0.136	0.142
D	0.691	0.578	0.578	0.631	0.603	0.62	0.616	0.636	0.645	0.124	0.129	0.136
E	0.636	0.582	0.555	0.597	0.605	0.582	0.637	0.628	0.605	0.141	0.155	0.145
F	0.561	0.524	0.484	0.567	0.54	0.551	0.599	0.6	0.604	0.145	0.15	0.152
G	0.52	0.456	0.443	0.514	0.524	0.514	0.607	0.594	0.572	0.149	0.151	0.151
H	0.142	0.138	0.137	0.138	0.134	0.135	0.14	0.141	0.145	0.149	0.158	0.161
	2. Average over replicates based on Raw Data (540)
	mature VEGF-C+CatD (0.5ul)			mature VEGF-C+CatD (1 ul)			mature VEGF-C			control
A	0.605	0.605	0.605	0.562	0.562	0.562	0.613	0.613	0.613	0.126	0.126	0.126
B	0.585	0.585	0.585	0.582	0.582	0.582	0.623	0.623	0.623	0.126	0.126	0.126
C	0.637	0.637	0.637	0.602	0.602	0.602	0.69	0.69	0.69	0.135	0.135	0.135
D	0.616	0.616	0.616	0.618	0.618	0.618	0.632	0.632	0.632	0.13	0.13	0.13
E	0.591	0.591	0.591	0.594	0.594	0.594	0.623	0.623	0.623	0.147	0.147	0.147
F	0.523	0.523	0.523	0.553	0.553	0.553	0.601	0.601	0.601	0.149	0.149	0.149
G	0.473	0.473	0.473	0.518	0.518	0.518	0.591	0.591	0.591	0.151	0.151	0.151
H	0.139	0.139	0.139	0.136	0.136	0.136	0.142	0.142	0.142	0.156	0.156	0.156
				0.5ul	1ul	VEGFC control	media control
			0	0.139	0.136	0.142	0.156
			13.1836	0.473	0.518	0.591	0.151
			26.3672	0.523	0.553	0.601	0.149
			52.7344	0.591	0.594	0.623	0.147
			105.469	0.616	0.618	0.632	0.13
			210.938	0.637	0.602	0.69	0.135
			421.875	0.585	0.582	0.623	0.126
			843.75	0.605	0.562	0.613	0.126
