# Supplementary figures and images for: KLK3/PSA and cathepsin D activate VEGF-C and VEGF-D
Source: eLife journal article supplement (doi:10.7554/elife.44478), 2019-05-17

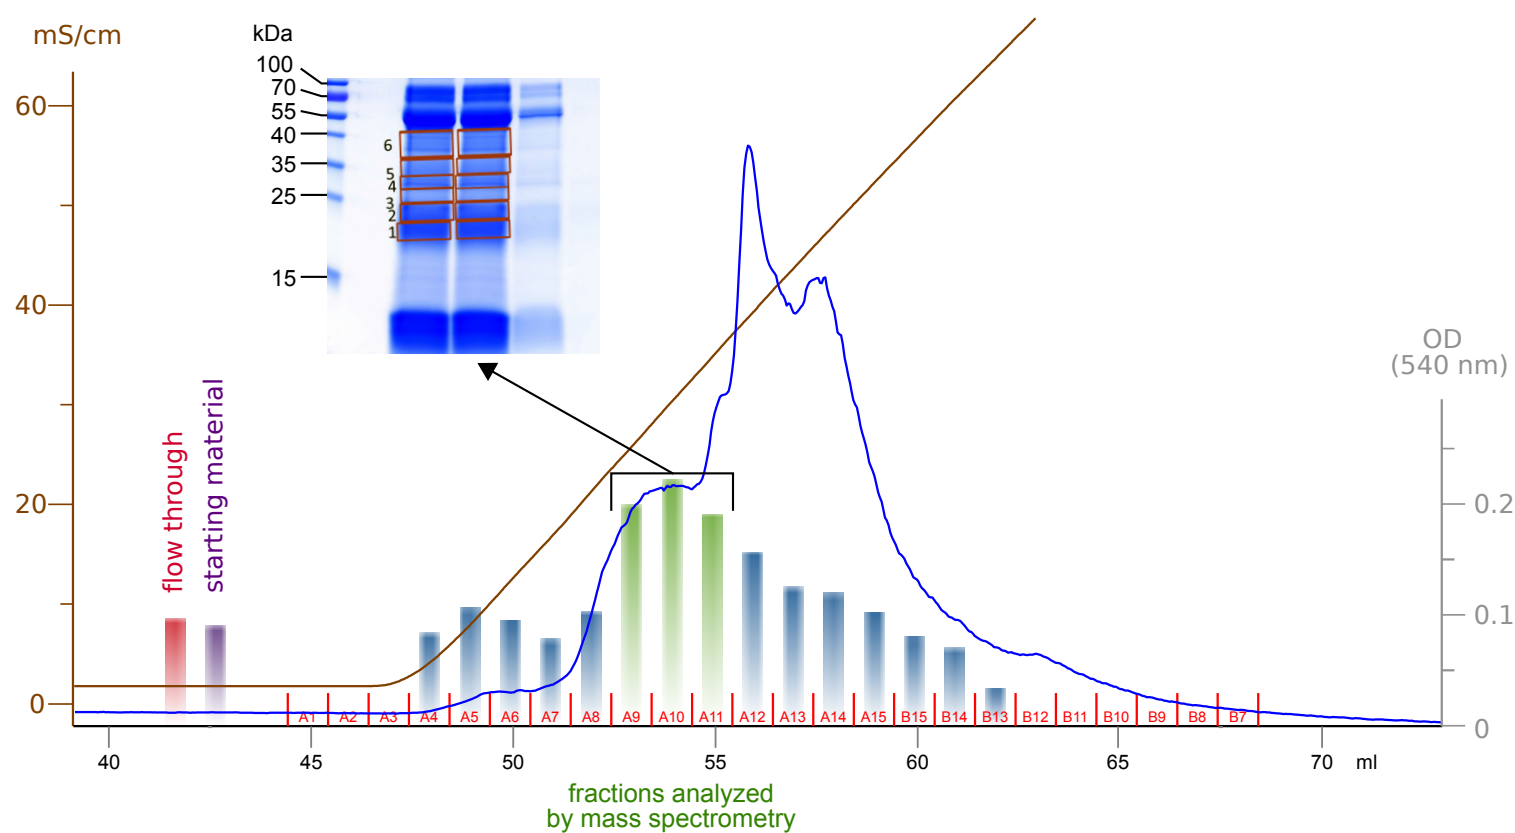

Figure 6-figure supplement 1. Enrichment and fractionation of VEGF-C cleaving activity

Supplement: supp [file elife-44478-supp-v1.zip]

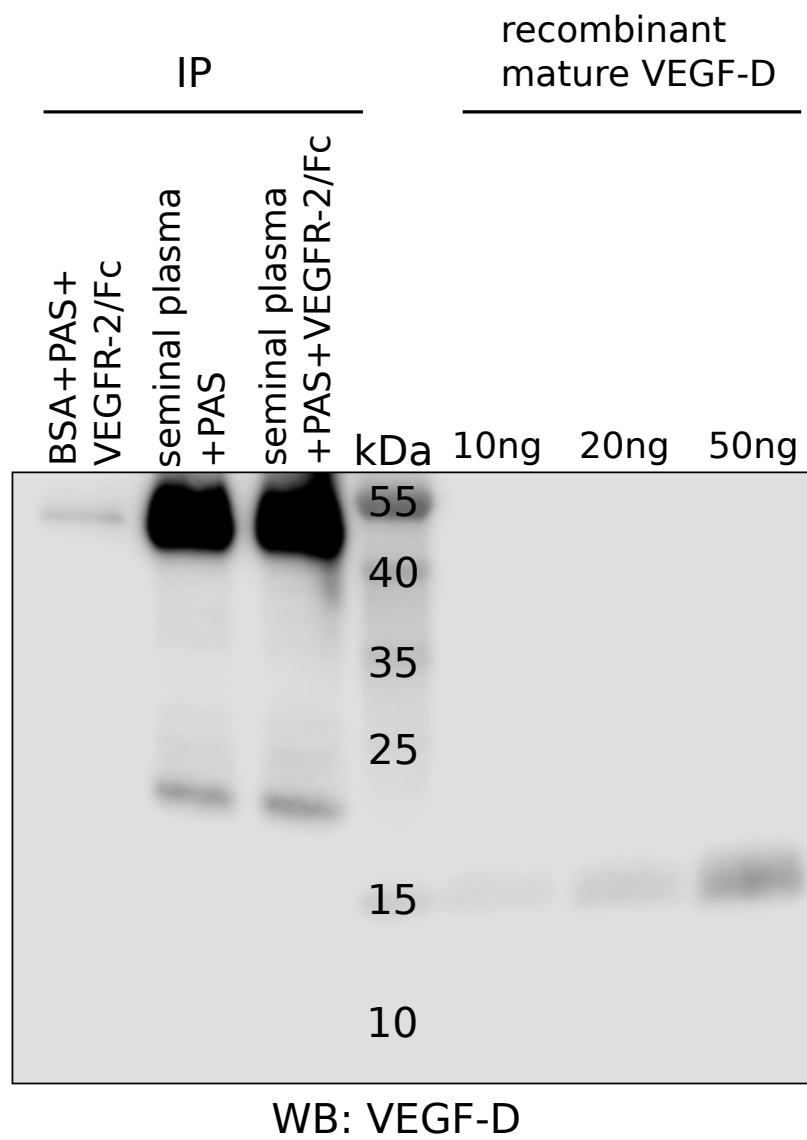

Figure 3-figure supplement 3: No detection of VEGF-D in seminal plasma

Supplement: supp [file elife-44478-supp-v1.zip]

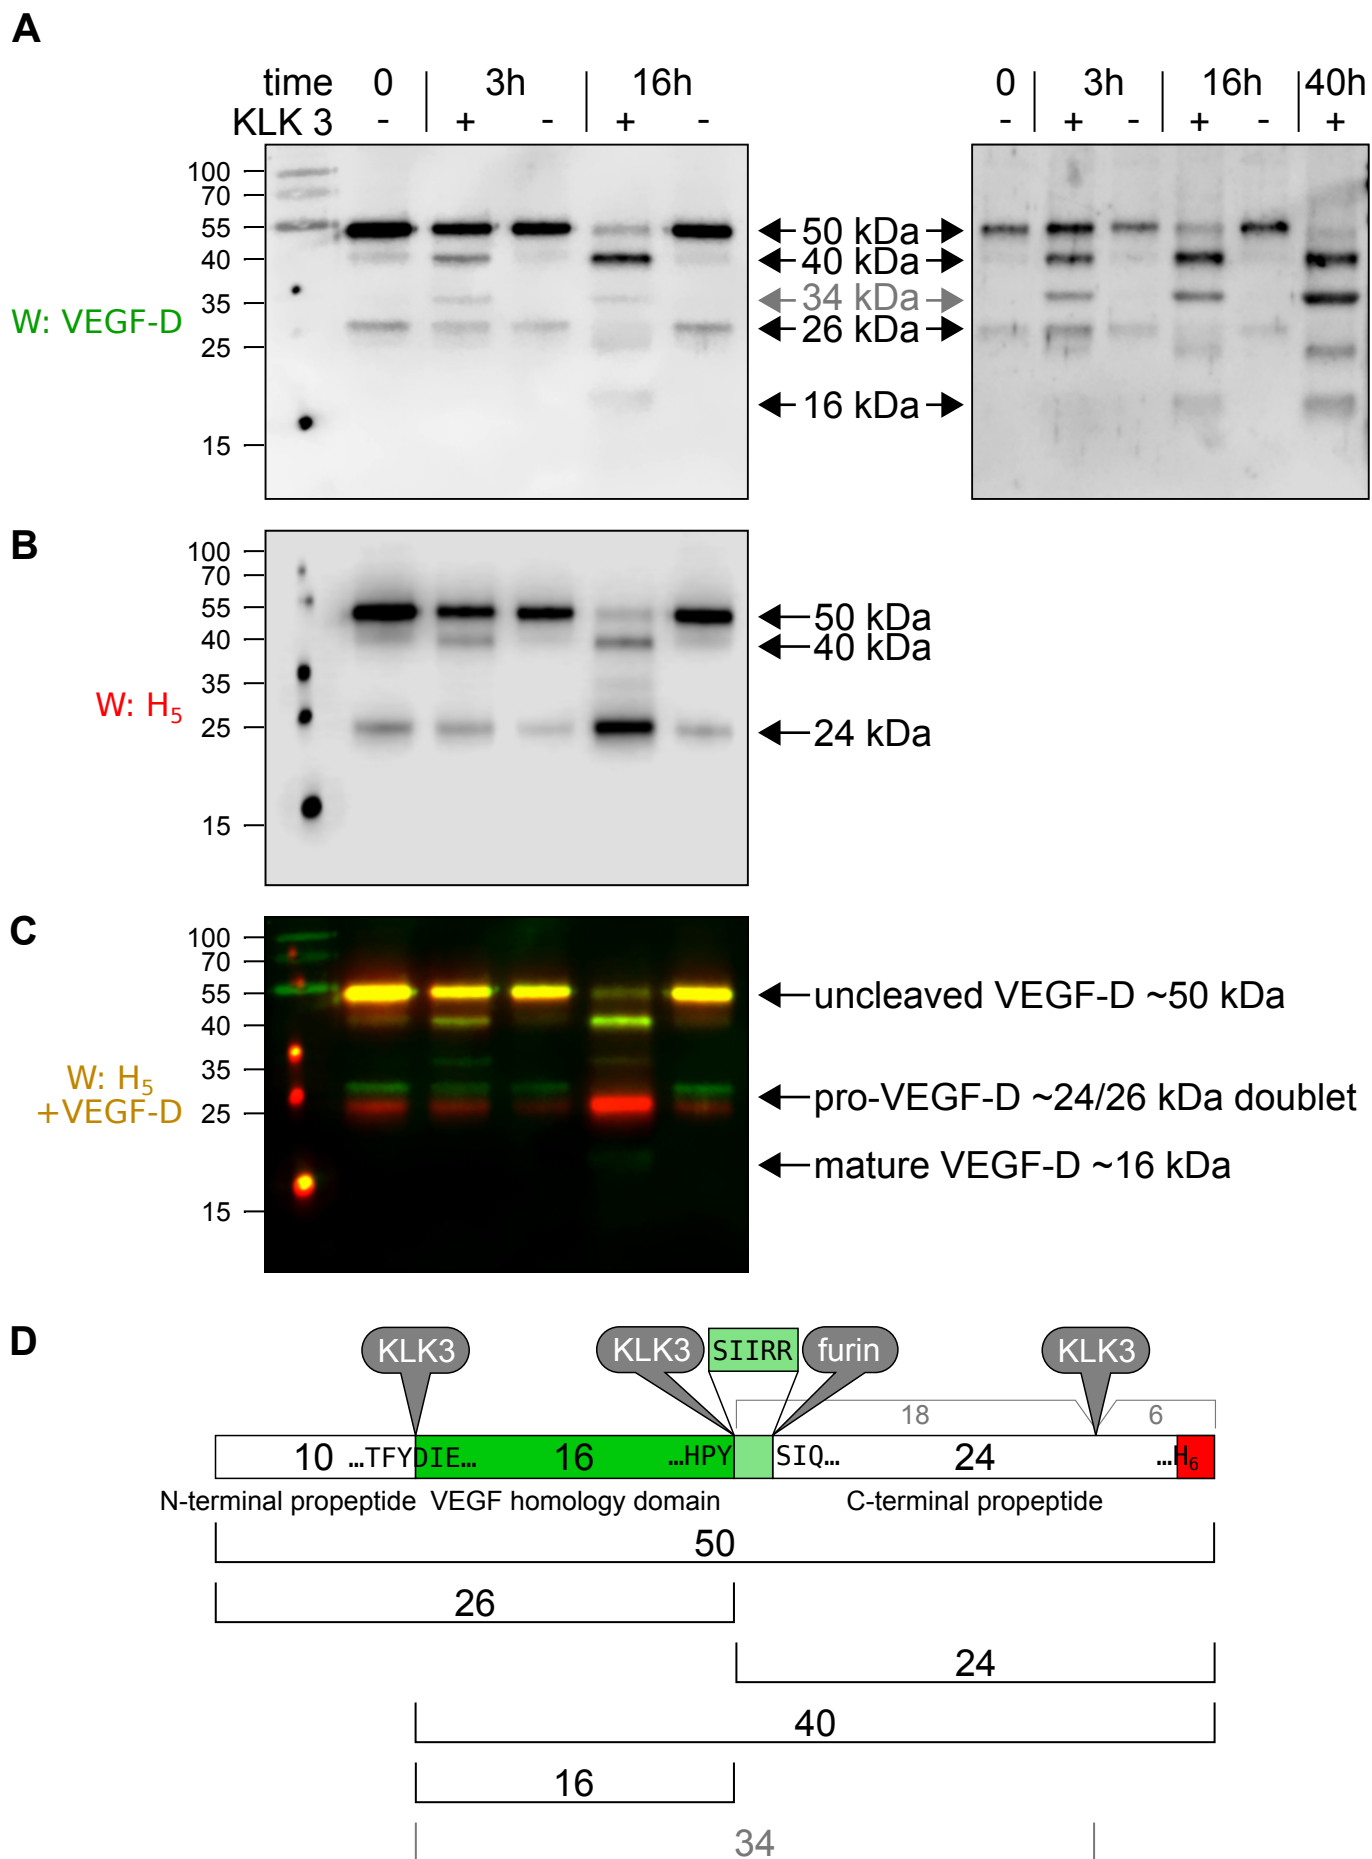

Figure 7-figure supplement 2: KLK3/PSA can proteolytically remove both propeptides from VEGF-D

Supplement: supp [file elife-44478-supp-v1.zip › elife_poa_e44478_Figure_7_figure_supplement_2.pdf]

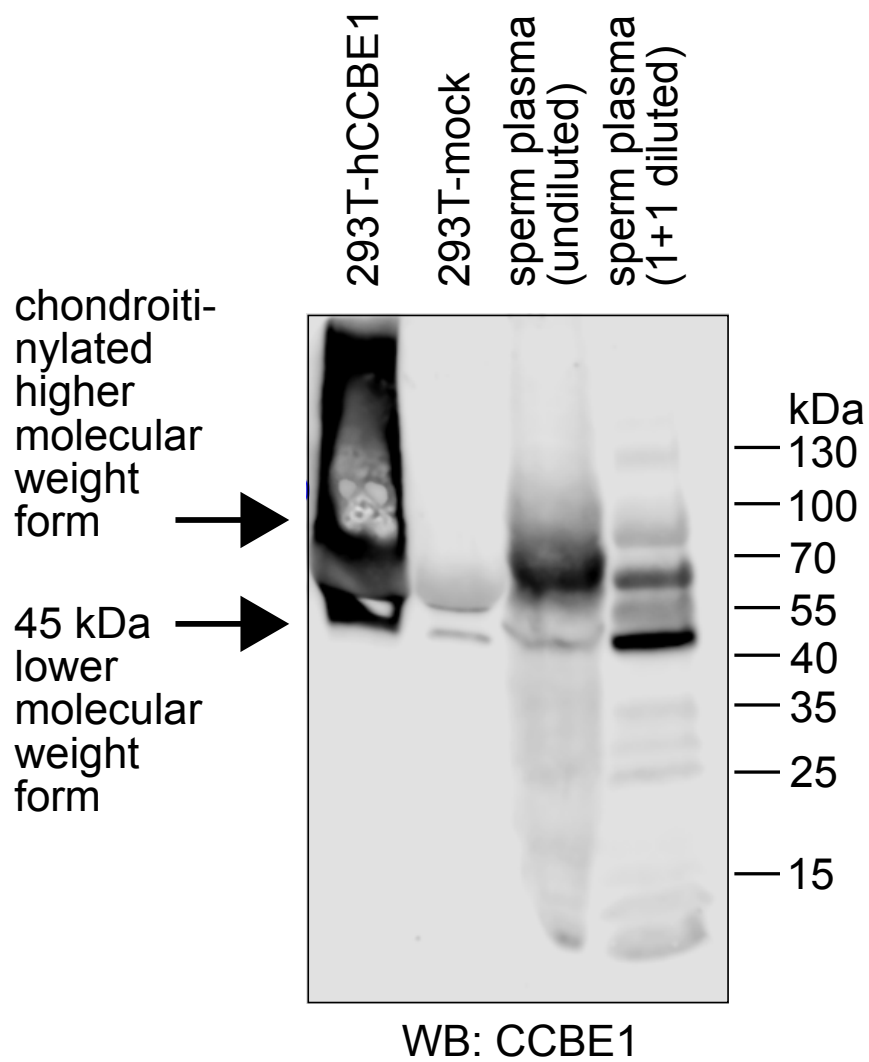

Figure 4-figure supplement 1. Seminal plasma contains CCBE1 protein

Supplement: supp [file elife-44478-supp-v1.zip › elife_poa_e44478_Figure_4_figure_supplement_1.pdf]

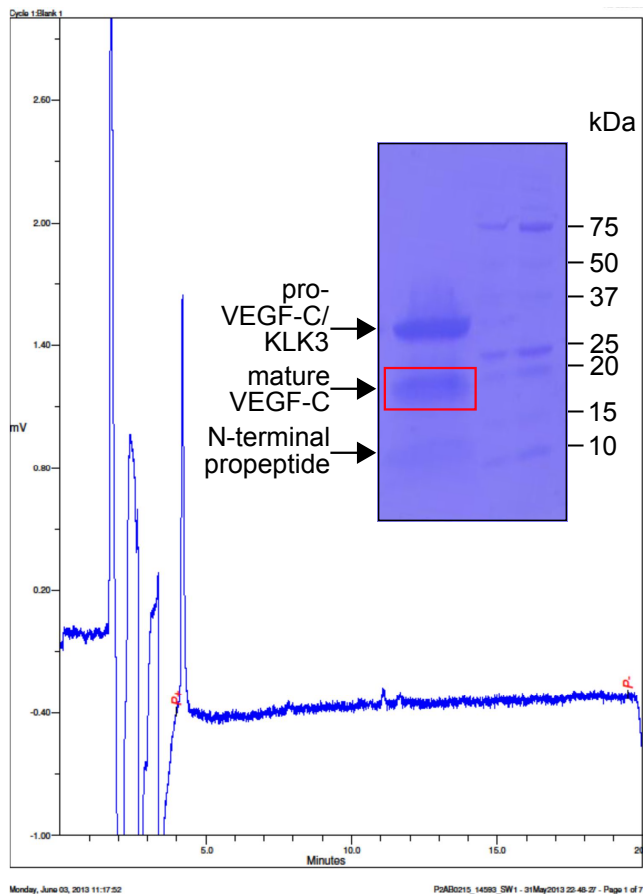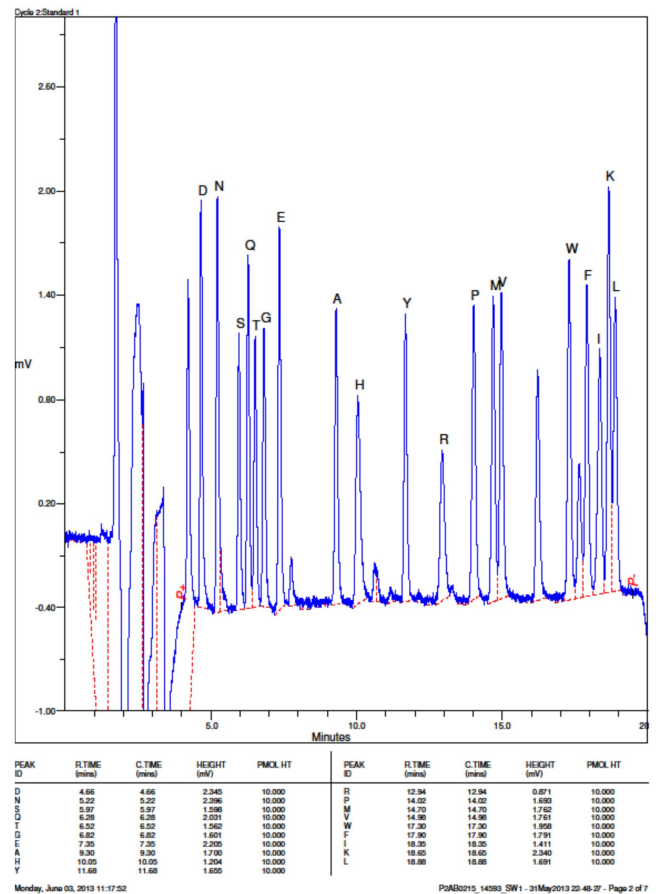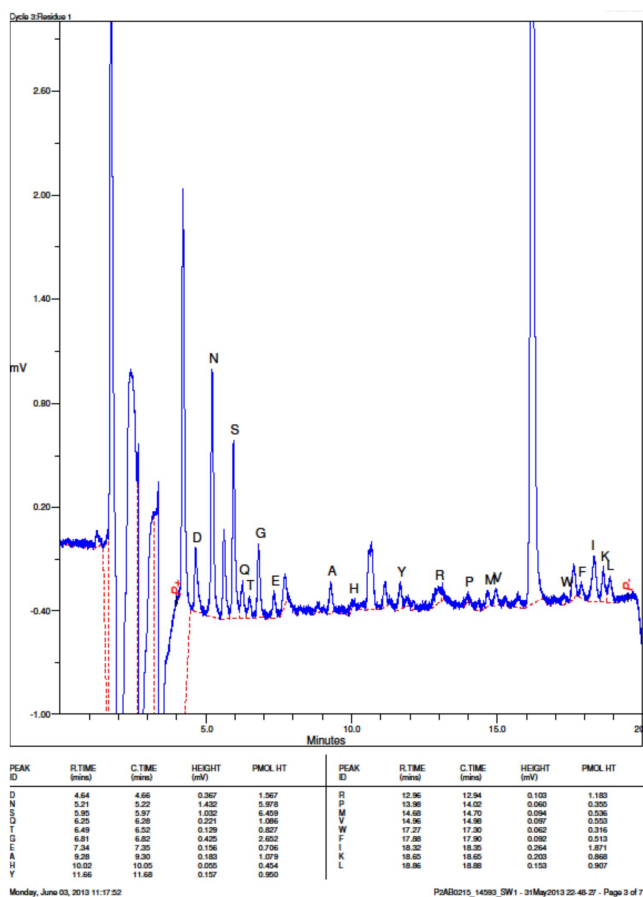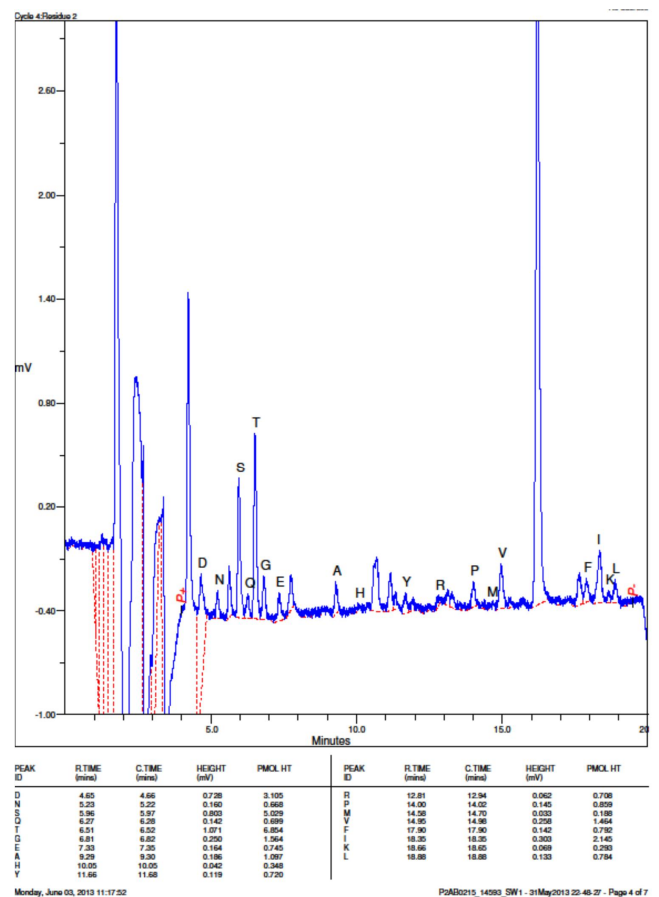

Figure 2-figure supplement 1: Results of Edman degradation of KLK3-cleaved pro-VEGF-C

Supplement: supp [file elife-44478-supp-v1.zip › elife_poa_e44478_Figure_2_figure_supplement_1.pdf]

**A**

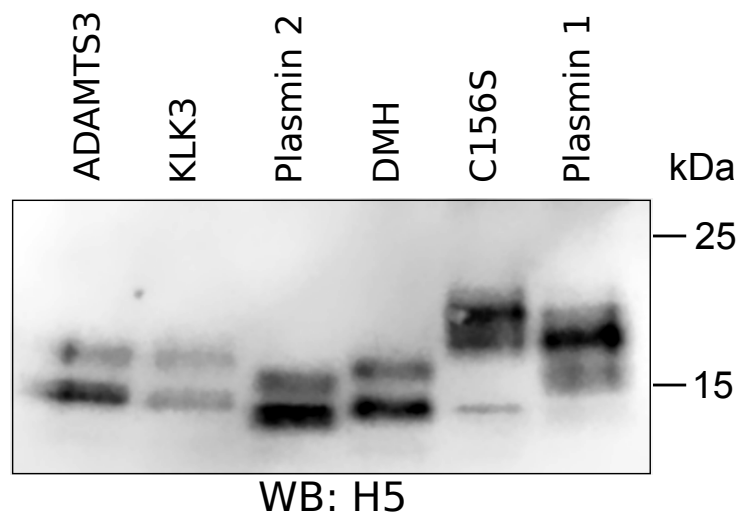

**B**

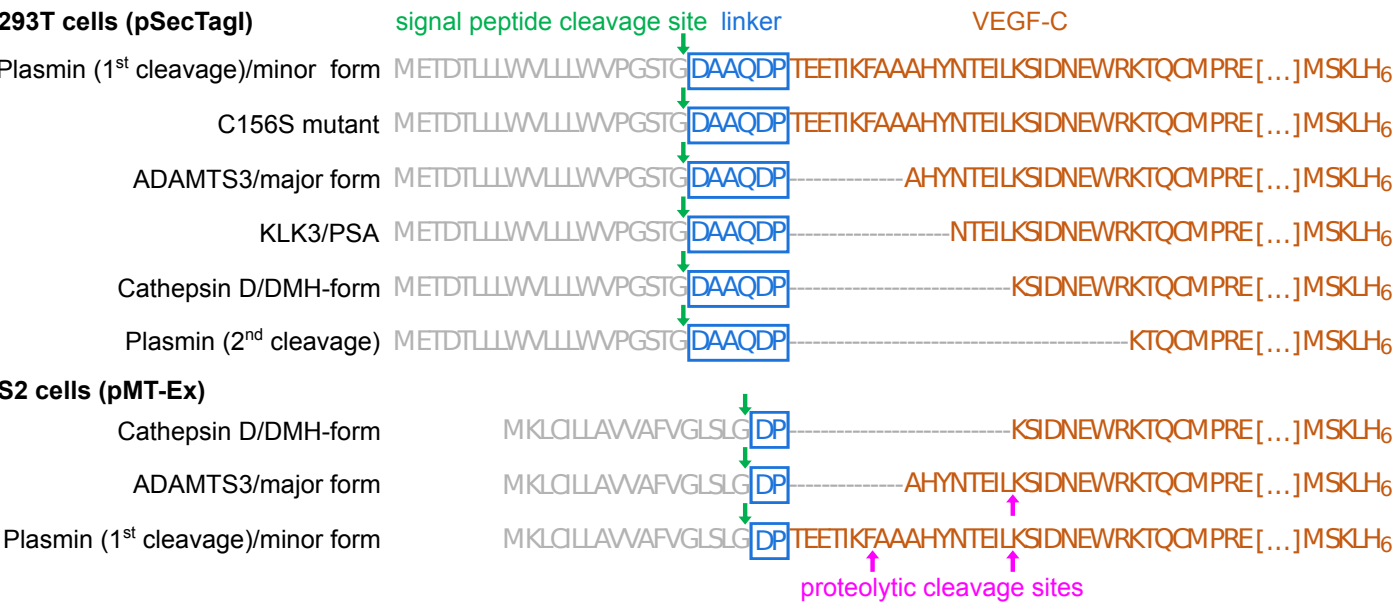

**C**

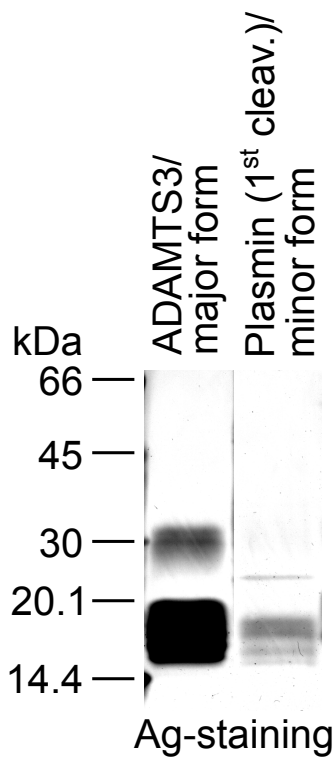

Figure 5-figure supplement 1. Secondary activation of the longer mature VEGF-C form in S2 cells

Supplement: supp [file elife-44478-supp-v1.zip › elife_poa_e44478_Figure_5_figure_supplement_1.pdf]

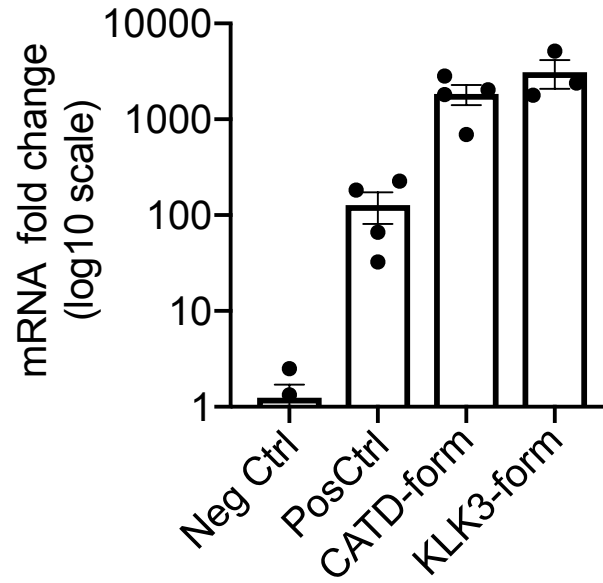

Figure 8-figure supplement 1: Expression of VEGF-C mRNA in tibialis anterior (TA) muscle

Supplement: supp [file elife-44478-supp-v1.zip › elife_poa_e44478_Figure_8_figure_supplement_1.pdf]
